# Supplementary material for: In Vitro and In Vivo Enhancement of Temozolomide Effect in Human Glioblastoma by Non-Invasive Application of Cold Atmospheric Plasma
Source: MDPI journal article supplement (doi:10.3390/cancers13174485), 2021-09-06
Supplement: s1 [file s1]

**Supplementary Table 2: List of top 134 down-regulated genes in CAP treatment**

| Sr. No | Gene Name  | GeneID            | Log2(FC) | P-adj     | Description                                                                                             | Chromosome | Strand |
|--------|------------|-------------------|----------|-----------|---------------------------------------------------------------------------------------------------------|------------|--------|
| [1]    | AC004949.1 | ENSG00000283117.1 | -6.9793  | 1.88E-80  | uncharacterized LOC79150<br>[Source:NCBI gene (formerly<br>Entrezgene);Acc:79150]                       | chr7       | -      |
| [2]    | SNORA48    | ENSG00000209582.1 | -4.63482 | 1.29E-49  | small nucleolar RNA,<br>H/ACA box 48<br>[Source:HGNC<br>Symbol;Acc:HGNC:32641]                          | chr17      | +      |
| [3]    | PIGW       | ENSG00000277161.2 | -4.48098 | 5.40E-25  | phosphatidylinositol glycan<br>anchor biosynthesis class W<br>[Source:HGNC<br>Symbol;Acc:HGNC:23213]    | chr17      | +      |
| [4]    | SRGAP2D    | ENSG00000270872.2 | -4.37259 | 1.31E-23  | SLIT-ROBO Rho GTPase<br>activating protein 2D<br>(pseudogene)<br>[Source:HGNC<br>Symbol;Acc:HGNC:43932] | chr1       | +      |
| [5]    | AC026464.4 | ENSG00000260914.3 | -4.12949 | 2.14E-19  | novel protein                                                                                           | chr16      | +      |
| [6]    | SNORA63    | ENSG00000200320.1 | -3.9004  | 7.88E-22  | small nucleolar RNA,<br>H/ACA box 63<br>[Source:HGNC<br>Symbol;Acc:HGNC:10106]                          | chr3       | +      |
| [7]    | MT-TN      | ENSG00000210135.1 | -3.60601 | 3.86E-66  | mitochondrially encoded<br>tRNA-Asn (AAU/C)<br>[Source:HGNC<br>Symbol;Acc:HGNC:7493]                    | chrM       | -      |
| [8]    | MT-TF      | ENSG00000210049.1 | -3.60452 | 6.22E-21  | mitochondrially encoded<br>tRNA-Phe (UUU/C)<br>[Source:HGNC<br>Symbol;Acc:HGNC:7481]                    | chrM       | +      |
| [9]    | SMIM11B    | ENSG00000273590.4 | -3.48028 | 3.41E-13  | small integral membrane<br>protein 11B [Source:HGNC<br>Symbol;Acc:HGNC:51846]                           | chr21      | +      |
| [10]   | HIST2H3D   | ENSG00000183598.3 | -3.38011 | 6.88E-190 | H3 clustered histone 13<br>[Source:HGNC<br>Symbol;Acc:HGNC:25311]                                       | chr1       | -      |
| [11]   | Y_RNA      | ENSG00000200494.1 | -3.33084 | 4.13E-24  | Y RNA<br>[Source:RFAM;Acc:RF00019]                                                                      | chr20      | -      |
| [12]   | RNY3P1     | ENSG00000201955.1 | -3.33084 | 4.13E-24  | RNY3 pseudogene 1<br>[Source:HGNC<br>Symbol;Acc:HGNC:42477]                                             | chr5       | -      |
| [13]   | RNY3       | ENSG00000202354.1 | -3.33084 | 4.13E-24  | RNA, Ro60-associated Y3<br>[Source:HGNC<br>Symbol;Acc:HGNC:10243]                                       | chr7       | +      |
| [14]   | Y_RNA      | ENSG00000207142.1 | -3.33084 | 4.13E-24  | Y RNA<br>[Source:RFAM;Acc:RF00019]                                                                      | chr12      | +      |
| [15]   | HIST1H3J   | ENSG00000197153.4 | -3.25795 | 5.45E-161 | H3 clustered histone 12<br>[Source:HGNC<br>Symbol;Acc:HGNC:4774]                                        | chr6       | -      |
| [16]   | AC051619.8 | ENSG00000260035.1 | -3.25346 | 9.26E-17  | novel transcript                                                                                        | chr15      | -      |
| [17]   | HIST1H2BM  | ENSG00000273703.1 | -3.24626 | 6.00E-117 | H2B clustered histone 14<br>[Source:HGNC<br>Symbol;Acc:HGNC:4750]                                       | chr6       | +      |

|      |            |                   |          |           |                                                                                                                      |       |   |
|------|------------|-------------------|----------|-----------|----------------------------------------------------------------------------------------------------------------------|-------|---|
| [18] | HIST1H2AB  | ENSG00000278463.1 | -3.18572 | 1.32E-89  | H2A clustered histone 4<br>[Source:HGNC<br>Symbol;Acc:HGNC:4734]                                                     | chr6  | - |
| [19] | MT-TA      | ENSG00000210127.1 | -3.16725 | 1.45E-22  | mitochondrially encoded<br>tRNA-Ala (GCN)<br>[Source:HGNC<br>Symbol;Acc:HGNC:7475]                                   | chrM  | - |
| [20] | HIST1H3I   | ENSG00000275379.1 | -3.14679 | 4.97E-65  | H3 clustered histone 11<br>[Source:HGNC<br>Symbol;Acc:HGNC:4771]                                                     | chr6  | - |
| [21] | SNORA57    | ENSG00000206597.1 | -3.13598 | 6.66E-48  | small nucleolar RNA,<br>H/ACA box 57<br>[Source:HGNC<br>Symbol;Acc:HGNC:32651]                                       | chr11 | + |
| [22] | SNORD10    | ENSG00000238917.1 | -3.06821 | 9.92E-13  | small nucleolar RNA, C/D<br>box 10 [Source:HGNC<br>Symbol;Acc:HGNC:32706]                                            | chr17 | + |
| [23] | HIST1H2AL  | ENSG00000276903.1 | -3.03548 | 1.74E-180 | H2A clustered histone 16<br>[Source:HGNC<br>Symbol;Acc:HGNC:4730]                                                    | chr6  | + |
| [24] | HIST1H3G   | ENSG00000273983.1 | -3.00694 | 1.20E-228 | H3 clustered histone 8<br>[Source:HGNC<br>Symbol;Acc:HGNC:4772]                                                      | chr6  | - |
| [25] | RNU5F-1    | ENSG00000199377.1 | -2.96175 | 2.49E-14  | RNA, U5F small nuclear 1<br>[Source:HGNC<br>Symbol;Acc:HGNC:10216]                                                   | chr1  | - |
| [26] | C4orf48    | ENSG00000243449.6 | -2.91532 | 3.52E-09  | chromosome 4 open reading<br>frame 48 [Source:HGNC<br>Symbol;Acc:HGNC:34437]                                         | chr4  | + |
| [27] | RN7SL128P  | ENSG00000240869.3 | -2.91498 | 0         | RNA, 7SL, cytoplasmic 128,<br>pseudogene [Source:HGNC<br>Symbol;Acc:HGNC:46144]                                      | chr6  | - |
| [28] | HIST1H2BJ  | ENSG00000124635.8 | -2.91303 | 2.62E-169 | H2B clustered histone 11<br>[Source:HGNC<br>Symbol;Acc:HGNC:4761]                                                    | chr6  | - |
| [29] | MT-ND3     | ENSG00000198840.2 | -2.90632 | 1.03E-125 | mitochondrially encoded<br>NADH:ubiquinone<br>oxidoreductase core subunit<br>3 [Source:HGNC<br>Symbol;Acc:HGNC:7458] | chrM  | + |
| [30] | HIST1H3A   | ENSG00000275714.1 | -2.88092 | 4.86E-70  | H3 clustered histone 1<br>[Source:HGNC<br>Symbol;Acc:HGNC:4766]                                                      | chr6  | + |
| [31] | HIST1H1A   | ENSG00000124610.4 | -2.85819 | 1.44E-38  | H1.1 linker histone, cluster<br>member [Source:HGNC<br>Symbol;Acc:HGNC:4715]                                         | chr6  | - |
| [32] | HIST2H3DP1 | ENSG00000213244.3 | -2.85738 | 2.60E-46  | H3 histone pseudogene 4<br>[Source:HGNC<br>Symbol;Acc:HGNC:43797]                                                    | chr1  | - |
| [33] | RNU4-2     | ENSG00000202538.1 | -2.84925 | 5.95E-52  | RNA, U4 small nuclear 2<br>[Source:HGNC<br>Symbol;Acc:HGNC:10193]                                                    | chr12 | - |
| [34] | RNU4-1     | ENSG00000200795.1 | -2.81825 | 3.44E-41  | RNA, U4 small nuclear 1<br>[Source:HGNC<br>Symbol;Acc:HGNC:10192]                                                    | chr12 | - |
| [35] | RNU2-2P    | ENSG00000222328.1 | -2.80875 | 2.01E-10  | RNA, U2 small nuclear 2,<br>pseudogene [Source:HGNC<br>Symbol;Acc:HGNC:10152]                                        | chr11 | - |

|      |            |                    |          |           |                                                                                    |       |   |
|------|------------|--------------------|----------|-----------|------------------------------------------------------------------------------------|-------|---|
| [36] | HIST1H2AI  | ENSG00000196747.4  | -2.80745 | 1.19E-196 | H2A clustered histone 13<br>[Source:HGNC<br>Symbol;Acc:HGNC:4725]                  | chr6  | + |
| [37] | HIST1H4B   | ENSG00000278705.1  | -2.80472 | 5.82E-260 | H4 clustered histone 2<br>[Source:HGNC<br>Symbol;Acc:HGNC:4789]                    | chr6  | - |
| [38] | HIST1H2AG  | ENSG00000196787.3  | -2.80116 | 6.76E-266 | H2A clustered histone 11<br>[Source:HGNC<br>Symbol;Acc:HGNC:4737]                  | chr6  | + |
| [39] | RN7SL674P  | ENSG00000239899.3  | -2.79438 | 0         | RNA, 75L, cytoplasmic 674,<br>pseudogene [Source:HGNC<br>Symbol;Acc:HGNC:46690]    | chr2  | + |
| [40] | FP671120.2 | ENSG00000277437.1  | -2.79154 | 7.00E-11  | nan                                                                                | chr21 | + |
| [41] | SNORA70    | ENSG00000207165.1  | -2.78785 | 1.16E-09  | small nucleolar RNA,<br>H/ACA box 70<br>[Source:HGNC<br>Symbol;Acc:HGNC:10231]     | chrX  | + |
| [42] | CR392039.1 | ENSG00000264063.1  | -2.76565 | 1.15E-10  | nan                                                                                | chr21 | + |
| [43] | HIST2H4B   | ENSG00000270276.2  | -2.76552 | 0         | H4 clustered histone 15<br>[Source:HGNC<br>Symbol;Acc:HGNC:29607]                  | chr1  | - |
| [44] | HIST2H4A   | ENSG00000270882.2  | -2.76466 | 0         | H4 clustered histone 14<br>[Source:HGNC<br>Symbol;Acc:HGNC:4794]                   | chr1  | + |
| [45] | RN7SKP230  | ENSG00000202512.1  | -2.74653 | 1.91E-232 | RN7SK pseudogene 230<br>[Source:HGNC<br>Symbol;Acc:HGNC:45954]                     | chr5  | - |
| [46] | SNORA54    | ENSG00000207008.1  | -2.73449 | 2.29E-11  | small nucleolar RNA,<br>H/ACA box 54<br>[Source:HGNC<br>Symbol;Acc:HGNC:32647]     | chr11 | - |
| [47] | ASPM       | ENSG00000066279.18 | -2.72395 | 0         | assembly factor for spindle<br>microtubules [Source:HGNC<br>Symbol;Acc:HGNC:19048] | chr1  | - |
| [48] | PRR11      | ENSG00000068489.12 | -2.70463 | 2.88E-127 | proline rich 11<br>[Source:HGNC<br>Symbol;Acc:HGNC:25619]                          | chr17 | + |
| [49] | AC008894.3 | ENSG00000279198.1  | -2.70336 | 3.58E-36  | TEC                                                                                | chr19 | - |
| [50] | HIST1H2BI  | ENSG00000278588.1  | -2.68702 | 4.85E-151 | H2B clustered histone 10<br>[Source:HGNC<br>Symbol;Acc:HGNC:4756]                  | chr6  | + |
| [51] | HIST1H1B   | ENSG00000184357.4  | -2.67681 | 0         | H1.5 linker histone, cluster<br>member [Source:HGNC<br>Symbol;Acc:HGNC:4719]       | chr6  | - |
| [52] | SNORA73A   | ENSG00000274266.1  | -2.66579 | 5.85E-239 | small nucleolar RNA,<br>H/ACA box 73A<br>[Source:HGNC<br>Symbol;Acc:HGNC:10115]    | chr1  | + |
| [53] | SNORA71A   | ENSG00000225091.3  | -2.65584 | 6.06E-09  | small nucleolar RNA,<br>H/ACA box 71A<br>[Source:HGNC<br>Symbol;Acc:HGNC:10232]    | chr20 | - |
| [54] | HIST1H2BF  | ENSG00000277224.2  | -2.65106 | 2.80E-128 | H2B clustered histone 7<br>[Source:HGNC<br>Symbol;Acc:HGNC:4752]                   | chr6  | + |
| [55] | MT-TC      | ENSG00000210140.1  | -2.63505 | 6.61E-62  | mitochondrially encoded<br>tRNA-Cys (UGU/C)                                        | chrM  | - |

|      |           |                    |          |           |                                                                                                             |       |   |
|------|-----------|--------------------|----------|-----------|-------------------------------------------------------------------------------------------------------------|-------|---|
|      |           |                    |          |           | [Source:HGNC<br>Symbol;Acc:HGNC:7477]                                                                       |       |   |
| [56] | HIST1H2BO | ENSG00000274641.1  | -2.61714 | 8.61E-146 | H2B clustered histone 17<br>[Source:HGNC<br>Symbol;Acc:HGNC:4758]                                           | chr6  | + |
| [57] | HIST1H2AH | ENSG00000274997.1  | -2.60995 | 7.51E-153 | H2A clustered histone 12<br>[Source:HGNC<br>Symbol;Acc:HGNC:13671]                                          | chr6  | + |
| [58] | HIST1H4L  | ENSG00000275126.1  | -2.58083 | 3.56E-62  | H4 clustered histone 13<br>[Source:HGNC<br>Symbol;Acc:HGNC:4791]                                            | chr6  | - |
| [59] | HIST1H1D  | ENSG00000124575.6  | -2.57455 | 3.94E-280 | H1.3 linker histone, cluster<br>member [Source:HGNC<br>Symbol;Acc:HGNC:4717]                                | chr6  | - |
| [60] | Y_RNA     | ENSG00000200314.1  | -2.56581 | 2.27E-09  | Y RNA<br>[Source:RFAM;Acc:RF00019]                                                                          | chr6  | + |
| [61] | HIST1H2AJ | ENSG00000276368.1  | -2.56318 | 1.26E-165 | H2A clustered histone 14<br>[Source:HGNC<br>Symbol;Acc:HGNC:4727]                                           | chr6  | - |
| [62] | HIST1H3C  | ENSG00000287080.1  | -2.55383 | 5.81E-256 | H3 clustered histone 3<br>[Source:HGNC<br>Symbol;Acc:HGNC:4768]                                             | chr6  | + |
| [63] | PHLDA2    | ENSG00000181649.8  | -2.5288  | 6.64E-07  | pleckstrin homoLogy like<br>domain family A member 2<br>[Source:HGNC<br>Symbol;Acc:HGNC:12385]              | chr11 | - |
| [64] | MT-TY     | ENSG00000210144.1  | -2.50629 | 3.49E-74  | mitochondrially encoded<br>tRNA-Tyr (UAU/C)<br>[Source:HGNC<br>Symbol;Acc:HGNC:7502]                        | chrM  | - |
| [65] | HIST1H3F  | ENSG00000277775.1  | -2.48751 | 1.60E-264 | H3 clustered histone 7<br>[Source:HGNC<br>Symbol;Acc:HGNC:4773]                                             | chr6  | - |
| [66] | HIST2H2AC | ENSG00000184260.5  | -2.46797 | 0         | H2A clustered histone 20<br>[Source:HGNC<br>Symbol;Acc:HGNC:4738]                                           | chr1  | + |
| [67] | Y_RNA     | ENSG00000199677.1  | -2.46495 | 1.12E-09  | Y RNA<br>[Source:RFAM;Acc:RF00019]                                                                          | chr5  | - |
| [68] | HERC3     | ENSG00000138641.18 | -2.45856 | 7.13E-07  | HECT and RLD domain<br>containing E3 ubiquitin<br>protein ligase 3<br>[Source:HGNC<br>Symbol;Acc:HGNC:4876] | chr4  | + |
| [69] | HIST2H3C  | ENSG00000203811.1  | -2.45211 | 0         | H3 clustered histone 14<br>[Source:HGNC<br>Symbol;Acc:HGNC:20503]                                           | chr1  | - |
| [70] | HIST2H3A  | ENSG00000203852.3  | -2.45172 | 0         | H3 clustered histone 15<br>[Source:HGNC<br>Symbol;Acc:HGNC:20505]                                           | chr1  | + |
| [71] | SNORA52   | ENSG00000199785.1  | -2.44577 | 9.61E-08  | small nucleolar RNA,<br>H/ACA box 52<br>[Source:HGNC<br>Symbol;Acc:HGNC:32645]                              | chr11 | + |
| [72] | KIF18B    | ENSG00000186185.14 | -2.43213 | 2.55E-83  | kinesin family member 18B<br>[Source:HGNC<br>Symbol;Acc:HGNC:27102]                                         | chr17 | - |
| [73] | MT-TE     | ENSG00000210194.1  | -2.43124 | 1.52E-23  | mitochondrially encoded<br>tRNA-Glu (GAA/G)                                                                 | chrM  | - |

|      |            |                    |          |           |                                                                                                |       |   |
|------|------------|--------------------|----------|-----------|------------------------------------------------------------------------------------------------|-------|---|
|      |            |                    |          |           | [Source:HGNC<br>Symbol;Acc:HGNC:7479]                                                          |       |   |
| [74] | RN7SL767P  | ENSG00000241529.3  | -2.42491 | 3.09E-23  | RNA, 7SL, cytoplasmic 767,<br>pseudogene [Source:HGNC<br>Symbol;Acc:HGNC:46783]                | chr3  | + |
| [75] | RNU5E-1    | ENSG00000199347.1  | -2.40068 | 5.49E-08  | RNA, U5E small nuclear 1<br>[Source:HGNC<br>Symbol;Acc:HGNC:10215]                             | chr1  | + |
| [76] | CENPA      | ENSG00000115163.15 | -2.39523 | 4.37E-43  | centromere protein A<br>[Source:HGNC<br>Symbol;Acc:HGNC:1851]                                  | chr2  | + |
| [77] | UHRF1      | ENSG00000276043.5  | -2.39224 | 1.27E-97  | ubiquitin like with PHD and<br>ring finger domains 1<br>[Source:HGNC<br>Symbol;Acc:HGNC:12556] | chr19 | + |
| [78] | PLK1       | ENSG00000166851.15 | -2.39024 | 4.16E-211 | polo like kinase 1<br>[Source:HGNC<br>Symbol;Acc:HGNC:9077]                                    | chr16 | + |
| [79] | NEURL1B    | ENSG00000214357.9  | -2.34878 | 3.36E-56  | neuralized E3 ubiquitin<br>protein ligase 1B<br>[Source:HGNC<br>Symbol;Acc:HGNC:35422]         | chr5  | + |
| [80] | HJURP      | ENSG00000123485.12 | -2.34196 | 5.33E-194 | Holliday junction<br>recognition protein<br>[Source:HGNC<br>Symbol;Acc:HGNC:25444]             | chr2  | - |
| [81] | TOP2A      | ENSG00000131747.15 | -2.33901 | 0         | DNA topoisomerase II alpha<br>[Source:HGNC<br>Symbol;Acc:HGNC:11989]                           | chr17 | - |
| [82] | HIST1H2AE  | ENSG00000277075.2  | -2.33858 | 1.94E-139 | H2A clustered histone 8<br>[Source:HGNC<br>Symbol;Acc:HGNC:4724]                               | chr6  | + |
| [83] | RDM1       | ENSG00000278023.6  | -2.33482 | 5.98E-06  | RAD52 motif containing 1<br>[Source:HGNC<br>Symbol;Acc:HGNC:19950]                             | chr17 | - |
| [84] | KIF20A     | ENSG00000112984.12 | -2.33418 | 2.75E-167 | kinesin family member 20A<br>[Source:HGNC<br>Symbol;Acc:HGNC:9787]                             | chr5  | + |
| [85] | CENPE      | ENSG00000138778.12 | -2.32713 | 0         | centromere protein E<br>[Source:HGNC<br>Symbol;Acc:HGNC:1856]                                  | chr4  | - |
| [86] | AC055736.1 | ENSG00000257500.1  | -2.32144 | 7.02E-06  | novel transcript, antisense to<br>KRT75 and KRT82                                              | chr12 | + |
| [87] | HIST1H2BB  | ENSG00000276410.3  | -2.31358 | 2.47E-94  | H2B clustered histone 3<br>[Source:HGNC<br>Symbol;Acc:HGNC:4751]                               | chr6  | - |
| [88] | POLA2      | ENSG00000014138.9  | -2.30274 | 1.65E-25  | DNA polymerase alpha 2,<br>accessory subunit<br>[Source:HGNC<br>Symbol;Acc:HGNC:30073]         | chr11 | + |
| [89] | SIGLEC15   | ENSG00000197046.12 | -2.25273 | 2.77E-157 | sialic acid binding Ig like<br>lectin 15 [Source:HGNC<br>Symbol;Acc:HGNC:27596]                | chr18 | + |
| [90] | HIST2H2BE  | ENSG00000184678.10 | -2.2433  | 2.54E-297 | H2B clustered histone 21<br>[Source:HGNC<br>Symbol;Acc:HGNC:4760]                              | chr1  | - |
| [91] | SNORA49    | ENSG00000208892.1  | -2.23619 | 1.05E-07  | small nucleolar RNA,<br>H/ACA box 49                                                           | chr12 | + |

|       |            |                    |          |           |                                                                                                     |       |   |
|-------|------------|--------------------|----------|-----------|-----------------------------------------------------------------------------------------------------|-------|---|
|       |            |                    |          |           | [Source:HGNC<br>Symbol;Acc:HGNC:32642]                                                              |       |   |
| [92]  | LMNB1      | ENSG00000113368.12 | -2.23459 | 5.79E-79  | lamin B1 [Source:HGNC<br>Symbol;Acc:HGNC:6637]                                                      | chr5  | + |
| [93]  | HIST1H4A   | ENSG00000278637.1  | -2.23286 | 3.48E-44  | H4 clustered histone 1<br>[Source:HGNC<br>Symbol;Acc:HGNC:4781]                                     | chr6  | + |
| [94]  | AL162151.2 | ENSG00000234648.1  | -2.23103 | 8.62E-11  | pseudogene similar to part<br>of ribosomal protein L3<br>(RPL3)                                     | chr14 | + |
| [95]  | HMMR       | ENSG00000072571.20 | -2.22078 | 3.10E-146 | hyaluronan mediated<br>motility receptor<br>[Source:HGNC<br>Symbol;Acc:HGNC:5012]                   | chr5  | + |
| [96]  | MKI67      | ENSG00000148773.14 | -2.21612 | 0         | marker of proliferation Ki-67<br>[Source:HGNC<br>Symbol;Acc:HGNC:7107]                              | chr10 | - |
| [97]  | CDCA8      | ENSG00000134690.11 | -2.21327 | 1.34E-132 | cell division cycle associated<br>8 [Source:HGNC<br>Symbol;Acc:HGNC:14629]                          | chr1  | + |
| [98]  | MT-ATP8    | ENSG00000228253.1  | -2.21192 | 6.04E-89  | mitochondrially encoded<br>ATP synthase membrane<br>subunit 8 [Source:HGNC<br>Symbol;Acc:HGNC:7415] | chrM  | + |
| [99]  | HIST2H2AA4 | ENSG00000272196.2  | -2.18859 | 0         | H2A clustered histone 19<br>[Source:HGNC<br>Symbol;Acc:HGNC:29668]                                  | chr1  | + |
| [100] | HIST2H2AA3 | ENSG00000203812.2  | -2.1874  | 0         | H2A clustered histone 18<br>[Source:HGNC<br>Symbol;Acc:HGNC:4736]                                   | chr1  | - |
| [101] | ARL17B     | ENSG00000228696.9  | -2.18695 | 2.76E-05  | ADP ribosylation factor like<br>GTPase 17B [Source:HGNC<br>Symbol;Acc:HGNC:32387]                   | chr17 | - |
| [102] | SCARNA22   | ENSG00000249784.1  | -2.18425 | 2.15E-06  | small Cajal body-specific<br>RNA 22 [Source:HGNC<br>Symbol;Acc:HGNC:32580]                          | chr4  | + |
| [103] | BUB1       | ENSG00000169679.15 | -2.17022 | 1.68E-220 | BUB1 mitotic checkpoint<br>serine/threonine kinase<br>[Source:HGNC<br>Symbol;Acc:HGNC:1148]         | chr2  | - |
| [104] | CDC20      | ENSG00000117399.14 | -2.15594 | 2.26E-178 | cell division cycle 20<br>[Source:HGNC<br>Symbol;Acc:HGNC:1723]                                     | chr1  | + |
| [105] | HIST1H2BG  | ENSG00000273802.2  | -2.15481 | 8.23E-170 | H2B clustered histone 8<br>[Source:HGNC<br>Symbol;Acc:HGNC:4746]                                    | chr6  | - |
| [106] | GTSE1      | ENSG00000075218.19 | -2.14291 | 1.56E-79  | G2 and S-phase expressed 1<br>[Source:HGNC<br>Symbol;Acc:HGNC:13698]                                | chr22 | + |
| [107] | RNY1       | ENSG00000201098.1  | -2.13736 | 3.95E-07  | RNA, Ro60-associated Y1<br>[Source:HGNC<br>Symbol;Acc:HGNC:10242]                                   | chr7  | - |
| [108] | AC009119.1 | ENSG00000260228.6  | -2.12052 | 5.17E-05  | novel transcript, antisense to<br>CDH13                                                             | chr16 | - |
| [109] | MT-TL1     | ENSG00000209082.1  | -2.11931 | 6.23E-25  | mitochondrially encoded<br>tRNA-Leu (UUA/G) 1<br>[Source:HGNC<br>Symbol;Acc:HGNC:7490]              | chrM  | + |

|       |            |                    |          |           |                                                                                  |       |   |
|-------|------------|--------------------|----------|-----------|----------------------------------------------------------------------------------|-------|---|
| [110] |            |                    |          |           | family with sequence similarity 110 member A [Source:HGNC Symbol;Acc:HGNC:16188] | chr20 | + |
|       | FAM110A    | ENSG00000125898.13 | -2.11612 | 6.73E-07  |                                                                                  |       |   |
| [111] |            |                    |          |           | hepatocyte growth factor [Source:HGNC Symbol;Acc:HGNC:4893]                      | chr7  | - |
|       | HGF        | ENSG00000019991.18 | -2.10729 | 3.08E-88  |                                                                                  |       |   |
| [112] |            |                    |          |           | small nucleolar RNA, H/ACA box 71D [Source:HGNC Symbol;Acc:HGNC:32657]           | chr20 | - |
|       | SNORA71D   | ENSG00000200354.1  | -2.10293 | 5.16E-06  |                                                                                  |       |   |
| [113] |            |                    |          |           | proline and serine rich coiled-coil 1 [Source:HGNC Symbol;Acc:HGNC:24472]        | chr1  | - |
|       | PSRC1      | ENSG00000134222.16 | -2.09555 | 2.02E-59  |                                                                                  |       |   |
| [114] |            |                    |          |           | chromosome transmission fidelity factor 18 [Source:HGNC Symbol;Acc:HGNC:18435]   | chr16 | + |
|       | CHTF18     | ENSG00000127586.17 | -2.09224 | 4.61E-22  |                                                                                  |       |   |
| [115] |            |                    |          |           | cyclin A2 [Source:HGNC Symbol;Acc:HGNC:1578]                                     | chr4  | - |
|       | CCNA2      | ENSG00000145386.10 | -2.09153 | 5.05E-205 |                                                                                  |       |   |
| [116] |            |                    |          |           | FOXC2 antisense RNA 1 [Source:HGNC Symbol;Acc:HGNC:50665]                        | chr16 | - |
|       | FOXC2-AS1  | ENSG00000260944.1  | -2.07957 | 7.44E-05  |                                                                                  |       |   |
| [117] |            |                    |          |           | cyclin F [Source:HGNC Symbol;Acc:HGNC:1591]                                      | chr16 | + |
|       | CCNF       | ENSG00000162063.13 | -2.07929 | 1.17E-58  |                                                                                  |       |   |
| [118] |            |                    |          |           | family with sequence similarity 83 member D [Source:HGNC Symbol;Acc:HGNC:16122]  | chr20 | + |
|       | FAM83D     | ENSG00000101447.15 | -2.07722 | 5.12E-118 |                                                                                  |       |   |
| [119] |            |                    |          |           | ubiquitin-like with PHD and ring finger domains 1 (UHRF1) pseudogene             | chr12 | + |
|       | AC112777.1 | ENSG00000256663.1  | -2.07368 | 6.25E-38  |                                                                                  |       |   |
| [120] |            |                    |          |           | H2A clustered histone 17 [Source:HGNC Symbol;Acc:HGNC:4735]                      | chr6  | - |
|       | HIST1H2AM  | ENSG00000278677.1  | -2.06322 | 1.33E-133 |                                                                                  |       |   |
| [121] |            |                    |          |           | H3 clustered histone 2 [Source:HGNC Symbol;Acc:HGNC:4776]                        | chr6  | - |
|       | HIST1H3B   | ENSG00000286522.1  | -2.06016 | 1.41E-295 |                                                                                  |       |   |
| [122] |            |                    |          |           | anillin actin binding protein [Source:HGNC Symbol;Acc:HGNC:14082]                | chr7  | + |
|       | ANLN       | ENSG00000011426.11 | -2.05611 | 0         |                                                                                  |       |   |
| [123] |            |                    |          |           | cell division cycle associated 7 [Source:HGNC Symbol;Acc:HGNC:14628]             | chr2  | + |
|       | CDCA7      | ENSG00000144354.14 | -2.0559  | 9.31E-38  |                                                                                  |       |   |
| [124] |            |                    |          |           | cyclin B1 [Source:HGNC Symbol;Acc:HGNC:1579]                                     | chr5  | + |
|       | CCNB1      | ENSG00000134057.15 | -2.05156 | 0         |                                                                                  |       |   |
| [125] |            |                    |          |           | H3 clustered histone 6 [Source:HGNC Symbol;Acc:HGNC:4769]                        | chr6  | + |
|       | HIST1H3E   | ENSG00000274750.2  | -2.04388 | 9.21E-28  |                                                                                  |       |   |
| [126] |            |                    |          |           | podocan like 1 [Source:HGNC Symbol;Acc:HGNC:26275]                               | chr19 | - |
|       | PODNL1     | ENSG00000132000.13 | -2.04222 | 0.000104  |                                                                                  |       |   |
| [127] |            |                    |          |           | H2B clustered histone 9 [Source:HGNC Symbol;Acc:HGNC:4755]                       | chr6  | + |
|       | HIST1H2BH  | ENSG00000275713.2  | -2.04055 | 3.25E-188 |                                                                                  |       |   |
| [128] |            |                    |          |           | inhibitor of DNA binding 1, HLH protein [Source:HGNC Symbol;Acc:HGNC:5360]       | chr20 | + |
|       | ID1        | ENSG00000125968.9  | -2.03915 | 2.81E-283 |                                                                                  |       |   |

|       |           |                    |          |           |                                                                                |       |   |
|-------|-----------|--------------------|----------|-----------|--------------------------------------------------------------------------------|-------|---|
| [129] | PALMD     | ENSG00000099260.11 | -2.03627 | 1.22E-120 | palmdelphin [Source:HGNC<br>Symbol;Acc:HGNC:15846]                             | chr1  | + |
| [130] | MIR3648-2 | ENSG00000264462.1  | -2.02883 | 6.66E-08  | microRNA 3648-2<br>[Source:HGNC<br>Symbol;Acc:HGNC:50843]                      | chr21 | + |
| [131] | MIR3648-1 | ENSG00000275708.1  | -2.02883 | 6.66E-08  | microRNA 3648-1<br>[Source:HGNC<br>Symbol;Acc:HGNC:38941]                      | chr21 | + |
| [132] | DHRS4     | ENSG00000157326.19 | -2.02561 | 5.74E-05  | dehydrogenase/reductase 4<br>[Source:HGNC<br>Symbol;Acc:HGNC:16985]            | chr14 | + |
| [133] | SNORA7B   | ENSG00000207088.1  | -2.02261 | 4.44E-06  | small nucleolar RNA,<br>H/ACA box 7B<br>[Source:HGNC<br>Symbol;Acc:HGNC:32593] | chr3  | - |
| [134] | HIST1H2BE | ENSG00000274290.2  | -2.00237 | 8.89E-64  | H2B clustered histone 6<br>[Source:HGNC<br>Symbol;Acc:HGNC:4753]               | chr6  | + |
