# Supplementary material for: In Vitro and In Vivo Enhancement of Temozolomide Effect in Human Glioblastoma by Non-Invasive Application of Cold Atmospheric Plasma
Source: MDPI journal article supplement (doi:10.3390/cancers13174485), 2021-09-06
Supplement: s1 [file s1]

**Supplementary Table 6: List of top 448 down-regulated genes in the case of CAP + TMZ treatment**

| Sr. No | Gene Name  | GeneID            | Log2(FC) | P-adj         | Description                                                                           | Chromosome | Strand |
|--------|------------|-------------------|----------|---------------|---------------------------------------------------------------------------------------|------------|--------|
| [1]    | AC004949.1 | ENSG00000283117.1 | -7.64067 | 2.05E-52      | uncharacterized LOC79150<br>[Source:NCBI gene (formerly<br>Entrezgene);Acc:79150]     | chr7       | -      |
| [2]    | PDXP       | ENSG00000241360.2 | -6.28187 | 4.27E-31      | pyridoxal phosphatase<br>[Source:HGNC<br>Symbol;Acc:HGNC:30259]                       | chr22      | +      |
| [3]    | AC009133.6 | ENSG00000280893.1 | -6.16662 | 1.27E-29      | novel transcript                                                                      | chr16      | +      |
| [4]    | SVIL2P     | ENSG00000234814.8 | -5.14657 | 1.12E-18      | supervillin family member 2,<br>pseudogene [Source:HGNC<br>Symbol;Acc:HGNC:44959]     | chr10      | +      |
| [5]    | FAM72D     | ENSG00000215784.6 | -4.89078 | 2.03E-16      | family with sequence similarity<br>72 member D [Source:HGNC<br>Symbol;Acc:HGNC:33593] | chr1       | +      |
| [6]    | RN7SKP230  | ENSG00000202512.1 | -4.78546 | 9.89E-<br>189 | RN7SK pseudogene 230<br>[Source:HGNC<br>Symbol;Acc:HGNC:45954]                        | chr5       | -      |
| [7]    | SNORA48    | ENSG00000209582.1 | -4.75196 | 2.58E-39      | small nucleolar RNA, H/ACA<br>box 48 [Source:HGNC<br>Symbol;Acc:HGNC:32641]           | chr17      | +      |
| [8]    | Y_RNA      | ENSG00000200494.1 | -4.73713 | 4.99E-21      | Y RNA<br>[Source:RFAM;Acc:RF00019]                                                    | chr20      | -      |
| [9]    | RNY3P1     | ENSG00000201955.1 | -4.73713 | 4.99E-21      | RNY3 pseudogene 1<br>[Source:HGNC<br>Symbol;Acc:HGNC:42477]                           | chr5       | -      |
| [10]   | RN7SL674P  | ENSG00000239899.3 | -4.73331 | 0             | RNA, 7SL, cytoplasmic 674,<br>pseudogene [Source:HGNC<br>Symbol;Acc:HGNC:46690]       | chr2       | +      |
| [11]   | SNORA57    | ENSG00000206597.1 | -4.64238 | 2.64E-40      | small nucleolar RNA, H/ACA<br>box 57 [Source:HGNC<br>Symbol;Acc:HGNC:32651]           | chr11      | +      |
| [12]   | RNY3       | ENSG00000202354.1 | -4.56784 | 4.44E-21      | RNA, Ro60-associated Y3<br>[Source:HGNC<br>Symbol;Acc:HGNC:10243]                     | chr7       | +      |
| [13]   | Y_RNA      | ENSG00000207142.1 | -4.56784 | 4.44E-21      | Y RNA<br>[Source:RFAM;Acc:RF00019]                                                    | chr12      | +      |
| [14]   | RN7SL128P  | ENSG00000240869.3 | -4.54329 | 0             | RNA, 7SL, cytoplasmic 128,<br>pseudogene [Source:HGNC<br>Symbol;Acc:HGNC:46144]       | chr6       | -      |
| [15]   | HIST1H2BM  | ENSG00000273703.1 | -4.54223 | 6.11E-98      | H2B clustered histone 14<br>[Source:HGNC<br>Symbol;Acc:HGNC:4750]                     | chr6       | +      |

|      |            |                        |          |               |                                                                                                               |       |   |
|------|------------|------------------------|----------|---------------|---------------------------------------------------------------------------------------------------------------|-------|---|
| [16] | RNU4-2     | ENSG00000202538.1      | -4.3821  | 7.07E-48      | RNA, U4 small nuclear 2<br>[Source:HGNC<br>Symbol;Acc:HGNC:10193]                                             | chr12 | - |
| [17] | SMIM11B    | ENSG00000273590.4      | -4.28122 | 1.78E-11      | small integral membrane protein<br>11B [Source:HGNC<br>Symbol;Acc:HGNC:51846]                                 | chr21 | + |
| [18] | SNORA63    | ENSG00000200320.1      | -4.27003 | 1.99E-17      | small nucleolar RNA, H/ACA<br>box 63 [Source:HGNC<br>Symbol;Acc:HGNC:10106]                                   | chr3  | + |
| [19] | MT-TF      | ENSG00000210049.1      | -4.26287 | 1.41E-17      | mitochondrially encoded tRNA-<br>Phe (UUU/C) [Source:HGNC<br>Symbol;Acc:HGNC:7481]                            | chrM  | + |
| [20] | AC051619.8 | ENSG00000260035.1      | -4.20922 | 1.17E-15      | novel transcript                                                                                              | chr15 | - |
| [21] | HIST1H2AB  | ENSG00000278463.1      | -4.19822 | 1.23E-77      | H2A clustered histone 4<br>[Source:HGNC<br>Symbol;Acc:HGNC:4734]                                              | chr6  | - |
| [22] | ATP23      | ENSG00000166896.9      | -4.17645 | 3.59E-11      | ATP23 metalloproteinase and<br>ATP synthase assembly factor<br>homoLog [Source:HGNC<br>Symbol;Acc:HGNC:29452] | chr12 | + |
| [23] | CDC42EP2   | ENSG00000149798.5      | -4.15609 | 1.36E-10      | CDC42 effector protein 2<br>[Source:HGNC<br>Symbol;Acc:HGNC:16263]                                            | chr11 | + |
| [24] | RNU4-1     | ENSG00000200795.1      | -4.12504 | 9.63E-42      | RNA, U4 small nuclear 1<br>[Source:HGNC<br>Symbol;Acc:HGNC:10192]                                             | chr12 | - |
| [25] | RNU5F-1    | ENSG00000199377.1      | -4.07629 | 2.17E-14      | RNA, U5F small nuclear 1<br>[Source:HGNC<br>Symbol;Acc:HGNC:10216]                                            | chr1  | - |
| [26] | HIST2H3D   | ENSG00000183598.3      | -4.06289 | 7.80E-<br>163 | H3 clustered histone 13<br>[Source:HGNC<br>Symbol;Acc:HGNC:25311]                                             | chr1  | - |
| [27] | NMU        | ENSG00000109255.1<br>1 | -4.06092 | 1.87E-10      | neuromedin U [Source:HGNC<br>Symbol;Acc:HGNC:7859]                                                            | chr4  | - |
| [28] | HIST1H3J   | ENSG00000197153.4      | -4.03104 | 1.11E-<br>140 | H3 clustered histone 12<br>[Source:HGNC<br>Symbol;Acc:HGNC:4774]                                              | chr6  | - |
| [29] | HIST1H2AI  | ENSG00000196747.4      | -3.94409 | 2.19E-<br>183 | H2A clustered histone 13<br>[Source:HGNC<br>Symbol;Acc:HGNC:4725]                                             | chr6  | + |
| [30] | HIST1H3F   | ENSG00000277775.1      | -3.85179 | 3.41E-<br>263 | H3 clustered histone 7<br>[Source:HGNC<br>Symbol;Acc:HGNC:4773]                                               | chr6  | - |
| [31] | ELMO3      | ENSG00000102890.1<br>6 | -3.81734 | 4.51E-09      | engulfment and cell motility 3<br>[Source:HGNC<br>Symbol;Acc:HGNC:17289]                                      | chr16 | + |

|      |                |                        |          |           |                                                                                          |       |   |
|------|----------------|------------------------|----------|-----------|------------------------------------------------------------------------------------------|-------|---|
| [32] | HIST1H1B       | ENSG00000184357.4      | -3.78791 | 0         | H1.5 linker histone, cluster member [Source:HGNC Symbol;Acc:HGNC:4719]                   | chr6  | - |
| [33] | AC010624.5     | ENSG00000287001.1      | -3.78161 | 6.72E-09  | novel transcript                                                                         | chr19 | - |
| [34] | Y_RNA          | ENSG00000199677.1      | -3.7704  | 6.16E-11  | Y RNA [Source:RFAM;Acc:RF00019]                                                          | chr5  | - |
| [35] | HIST1H3G       | ENSG00000273983.1      | -3.73645 | 1.04E-208 | H3 clustered histone 8 [Source:HGNC Symbol;Acc:HGNC:4772]                                | chr6  | - |
| [36] | SCARNA13       | ENSG00000252481.1      | -3.73281 | 4.84E-37  | small Cajal body-specific RNA 13 [Source:HGNC Symbol;Acc:HGNC:32570]                     | chr14 | - |
| [37] | CRYZL2P-SEC16B | ENSG00000254154.8      | -3.72005 | 1.54E-08  | CRYZL2P-SEC16B readthrough [Source:HGNC Symbol;Acc:HGNC:53757]                           | chr1  | - |
| [38] | HIST1H2AL      | ENSG00000276903.1      | -3.71452 | 2.79E-161 | H2A clustered histone 16 [Source:HGNC Symbol;Acc:HGNC:4730]                              | chr6  | + |
| [39] | AC092641.1     | ENSG00000227176.1      | -3.69885 | 1.82E-08  | NSA2 pseudogene 5 [Source:HGNC Symbol;Acc:HGNC:54584]                                    | chr2  | - |
| [40] | COL1A1         | ENSG00000108821.1<br>3 | -3.69756 | 0         | collagen type I alpha 1 chain [Source:HGNC Symbol;Acc:HGNC:2197]                         | chr17 | - |
| [41] | SNORA80A       | ENSG00000200792.1      | -3.69333 | 1.96E-08  | small nucleolar RNA, H/ACA box 80A [Source:HGNC Symbol;Acc:HGNC:32666]                   | chr21 | - |
| [42] | RN7SL767P      | ENSG00000241529.3      | -3.68781 | 4.29E-26  | RNA, 7SL, cytoplasmic 767, pseudogene [Source:HGNC Symbol;Acc:HGNC:46783]                | chr3  | + |
| [43] | C4orf48        | ENSG00000243449.6      | -3.64586 | 3.45E-08  | chromosome 4 open reading frame 48 [Source:HGNC Symbol;Acc:HGNC:34437]                   | chr4  | + |
| [44] | MBOAT1         | ENSG00000172197.1<br>1 | -3.63223 | 4.29E-08  | membrane bound O-acyltransferase domain containing 1 [Source:HGNC Symbol;Acc:HGNC:21579] | chr6  | - |
| [45] | Y_RNA          | ENSG00000200314.1      | -3.6222  | 5.79E-10  | Y RNA [Source:RFAM;Acc:RF00019]                                                          | chr6  | + |
| [46] | HIST1H3B       | ENSG00000286522.1      | -3.59303 | 0         | H3 clustered histone 2 [Source:HGNC Symbol;Acc:HGNC:4776]                                | chr6  | - |
| [47] | HIST1H2AJ      | ENSG00000276368.1      | -3.55481 | 7.31E-164 | H2A clustered histone 14 [Source:HGNC Symbol;Acc:HGNC:4727]                              | chr6  | - |

|      |            |                        |          |               |                                                                                               |       |   |
|------|------------|------------------------|----------|---------------|-----------------------------------------------------------------------------------------------|-------|---|
| [48] | SNORD10    | ENSG00000238917.1      | -3.54538 | 3.99E-11      | small nucleolar RNA, C/D box 10<br>[Source:HGNC<br>Symbol;Acc:HGNC:32706]                     | chr17 | + |
| [49] | GRIA3      | ENSG00000125675.1<br>8 | -3.54277 | 1.14E-07      | glutamate ionotropic receptor<br>AMPA type subunit 3<br>[Source:HGNC<br>Symbol;Acc:HGNC:4573] | chrX  | + |
| [50] | U1         | ENSG00000270722.1      | -3.52911 | 7.40E-13      | RNA, variant U1 small nuclear<br>31 [Source:HGNC<br>Symbol;Acc:HGNC:54448]                    | chr1  | - |
| [51] | HIST1H2BI  | ENSG00000278588.1      | -3.52812 | 9.39E-<br>149 | H2B clustered histone 10<br>[Source:HGNC<br>Symbol;Acc:HGNC:4756]                             | chr6  | + |
| [52] | AL162151.2 | ENSG00000234648.1      | -3.52398 | 3.87E-13      | pseudogene similar to part of<br>ribosomal protein L3 (RPL3)                                  | chr14 | + |
| [53] | SNORA54    | ENSG00000207008.1      | -3.47616 | 7.42E-11      | small nucleolar RNA, H/ACA<br>box 54 [Source:HGNC<br>Symbol;Acc:HGNC:32647]                   | chr11 | - |
| [54] | MAGOH3P    | ENSG00000270975.1      | -3.46821 | 2.28E-07      | mago homoLog 3, pseudogene<br>[Source:HGNC<br>Symbol;Acc:HGNC:20020]                          | chr14 | + |
| [55] | HIST1H2BJ  | ENSG00000124635.8      | -3.44185 | 2.00E-<br>158 | H2B clustered histone 11<br>[Source:HGNC<br>Symbol;Acc:HGNC:4761]                             | chr6  | - |
| [56] | HIST1H3I   | ENSG00000275379.1      | -3.42477 | 1.75E-59      | H3 clustered histone 11<br>[Source:HGNC<br>Symbol;Acc:HGNC:4771]                              | chr6  | - |
| [57] | HIST1H4A   | ENSG00000278637.1      | -3.42257 | 7.68E-51      | H4 clustered histone 1<br>[Source:HGNC<br>Symbol;Acc:HGNC:4781]                               | chr6  | + |
| [58] | ARHGAP11B  | ENSG00000284906.1      | -3.40476 | 1.08E-06      | novel transcript                                                                              | chr15 | + |
| [59] | HIST1H1A   | ENSG00000124610.4      | -3.39934 | 4.10E-36      | H1.1 linker histone, cluster<br>member [Source:HGNC<br>Symbol;Acc:HGNC:4715]                  | chr6  | - |
| [60] | ASPM       | ENSG00000066279.1<br>8 | -3.37375 | 0             | assembly factor for spindle<br>microtubules [Source:HGNC<br>Symbol;Acc:HGNC:19048]            | chr1  | - |
| [61] | HIST1H4L   | ENSG00000275126.1      | -3.36571 | 4.51E-62      | H4 clustered histone 13<br>[Source:HGNC<br>Symbol;Acc:HGNC:4791]                              | chr6  | - |
| [62] | HIST2H3DP1 | ENSG00000213244.3      | -3.34614 | 2.34E-43      | H3 histone pseudogene 4<br>[Source:HGNC<br>Symbol;Acc:HGNC:43797]                             | chr1  | - |
| [63] | MT-TN      | ENSG00000210135.1      | -3.34333 | 9.86E-57      | mitochondrially encoded tRNA-<br>Asn (AAU/C) [Source:HGNC<br>Symbol;Acc:HGNC:7493]            | chrM  | - |
| [64] | AC008894.3 | ENSG00000279198.1      | -3.34103 | 2.53E-35      | TEC                                                                                           | chr19 | - |

|      |            |                        |          |           |                                                                                          |       |   |
|------|------------|------------------------|----------|-----------|------------------------------------------------------------------------------------------|-------|---|
| [65] | ST18       | ENSG00000147488.1<br>1 | -3.33726 | 8.41E-14  | ST18 C2H2C-type zinc finger transcription factor<br>[Source:HGNC Symbol;Acc:HGNC:18695]  | chr8  | - |
| [66] | C1QTNF9B   | ENSG00000205863.1<br>0 | -3.32498 | 9.81E-07  | C1q and TNF related 9B<br>[Source:HGNC Symbol;Acc:HGNC:34072]                            | chr13 | - |
| [67] | AP005233.2 | ENSG00000260877.2      | -3.30548 | 1.22E-06  | novel transcript                                                                         | chr11 | + |
| [68] | COL5A3     | ENSG00000080573.7      | -3.29474 | 1.24E-08  | collagen type V alpha 3 chain<br>[Source:HGNC Symbol;Acc:HGNC:14864]                     | chr19 | - |
| [69] | GNB3       | ENSG00000111664.1<br>0 | -3.29408 | 6.73E-08  | G protein subunit beta 3<br>[Source:HGNC Symbol;Acc:HGNC:4400]                           | chr12 | + |
| [70] | HIST1H2AH  | ENSG00000274997.1      | -3.29092 | 6.16E-151 | H2A clustered histone 12<br>[Source:HGNC Symbol;Acc:HGNC:13671]                          | chr6  | + |
| [71] | AC008163.1 | ENSG00000233491.8      | -3.27994 | 1.53E-06  | novel pseudogene containing cadherin repeats                                             | chr7  | - |
| [72] | DNLZ       | ENSG00000213221.5      | -3.27207 | 1.98E-10  | DNL-type zinc finger<br>[Source:HGNC Symbol;Acc:HGNC:33879]                              | chr9  | - |
| [73] | SNORA7B    | ENSG00000207088.1      | -3.25591 | 8.09E-08  | small nucleolar RNA, H/ACA box 7B<br>[Source:HGNC Symbol;Acc:HGNC:32593]                 | chr3  | - |
| [74] | PHLDA2     | ENSG00000181649.8      | -3.25494 | 2.01E-06  | pleckstrin homology like domain family A member 2<br>[Source:HGNC Symbol;Acc:HGNC:12385] | chr11 | - |
| [75] | SNORA71D   | ENSG00000200354.1      | -3.25082 | 6.29E-08  | small nucleolar RNA, H/ACA box 71D<br>[Source:HGNC Symbol;Acc:HGNC:32657]                | chr20 | - |
| [76] | HIST2H3C   | ENSG00000203811.1      | -3.23029 | 0         | H3 clustered histone 14<br>[Source:HGNC Symbol;Acc:HGNC:20503]                           | chr1  | - |
| [77] | HIST2H3A   | ENSG00000203852.3      | -3.22989 | 0         | H3 clustered histone 15<br>[Source:HGNC Symbol;Acc:HGNC:20505]                           | chr1  | + |
| [78] | AC079313.1 | ENSG00000258086.1      | -3.21579 | 3.18E-06  | novel transcript, antisense to ZNF385A, GPR84, ITGA5 and GTSF1                           | chr12 | + |
| [79] | RNU2-2P    | ENSG00000222328.1      | -3.21414 | 3.32E-06  | RNA, U2 small nuclear 2, pseudogene<br>[Source:HGNC Symbol;Acc:HGNC:10152]               | chr11 | - |
| [80] | PRC1-AS1   | ENSG00000258725.2      | -3.19542 | 1.42E-10  | PRC1 antisense RNA 1<br>[Source:HGNC Symbol;Acc:HGNC:48587]                              | chr15 | + |

|      |            |                        |          |           |                                                                                  |       |   |
|------|------------|------------------------|----------|-----------|----------------------------------------------------------------------------------|-------|---|
| [81] | AC004980.1 | ENSG00000205485.1<br>3 | -3.18982 | 5.12E-06  | pseudogene similar to part of postmeiotic segregation increased 2-like 3 PMS2L3  | chr7  | + |
| [82] | PLK1       | ENSG00000166851.1<br>5 | -3.17067 | 5.20E-219 | polo like kinase 1 [Source:HGNC Symbol;Acc:HGNC:9077]                            | chr16 | + |
| [83] | KIFC1      | ENSG00000237649.8      | -3.16217 | 2.02E-21  | kinesin family member C1 [Source:HGNC Symbol;Acc:HGNC:6389]                      | chr6  | + |
| [84] | SNORA70    | ENSG00000207165.1      | -3.16061 | 2.27E-08  | small nucleolar RNA, H/ACA box 70 [Source:HGNC Symbol;Acc:HGNC:10231]            | chrX  | + |
| [85] | HSPB6      | ENSG00000004776.1<br>3 | -3.15932 | 4.88E-06  | heat shock protein family B (small) member 6 [Source:HGNC Symbol;Acc:HGNC:26511] | chr19 | - |
| [86] | KIF18B     | ENSG00000186185.1<br>4 | -3.15653 | 8.14E-90  | kinesin family member 18B [Source:HGNC Symbol;Acc:HGNC:27102]                    | chr17 | - |
| [87] | HIST2H4A   | ENSG00000270882.2      | -3.15097 | 0         | H4 clustered histone 14 [Source:HGNC Symbol;Acc:HGNC:4794]                       | chr1  | + |
| [88] | HIST1H2BB  | ENSG00000276410.3      | -3.14803 | 9.26E-98  | H2B clustered histone 3 [Source:HGNC Symbol;Acc:HGNC:4751]                       | chr6  | - |
| [89] | AP001092.1 | ENSG00000237410.1      | -3.13451 | 5.97E-06  | NRXN2 antisense RNA 1 [Source:HGNC Symbol;Acc:HGNC:40416]                        | chr11 | + |
| [90] | HIST1H2BF  | ENSG00000277224.2      | -3.13145 | 2.14E-126 | H2B clustered histone 7 [Source:HGNC Symbol;Acc:HGNC:4752]                       | chr6  | + |
| [91] | MT-TA      | ENSG00000210127.1      | -3.12924 | 7.95E-19  | mitochondrially encoded tRNA-Ala (GCN) [Source:HGNC Symbol;Acc:HGNC:7475]        | chrM  | - |
| [92] | HIST1H1D   | ENSG00000124575.6      | -3.11859 | 3.07E-267 | H1.3 linker histone, cluster member [Source:HGNC Symbol;Acc:HGNC:4717]           | chr6  | - |
| [93] | CU633906.2 | ENSG00000278903.3      | -3.11689 | 6.76E-06  | novel transcript                                                                 | chr21 | + |
| [94] | HIST2H4B   | ENSG00000270276.2      | -3.11243 | 0         | H4 clustered histone 15 [Source:HGNC Symbol;Acc:HGNC:29607]                      | chr1  | - |
| [95] | SNORA73A   | ENSG00000274266.1      | -3.08779 | 3.69E-227 | small nucleolar RNA, H/ACA box 73A [Source:HGNC Symbol;Acc:HGNC:10115]           | chr1  | + |
| [96] | PRR11      | ENSG00000068489.1<br>2 | -3.08387 | 1.88E-121 | proline rich 11 [Source:HGNC Symbol;Acc:HGNC:25619]                              | chr17 | + |
| [97] | RN7SL342P  | ENSG00000239398.3      | -3.08041 | 2.62E-07  | RNA, 7SL, cytoplasmic 342, pseudogene [Source:HGNC Symbol;Acc:HGNC:46358]        | chr18 | + |

|       |            |                        |          |           |                                                                                 |       |   |
|-------|------------|------------------------|----------|-----------|---------------------------------------------------------------------------------|-------|---|
| [98]  | HJURP      | ENSG00000123485.1<br>2 | -3.0748  | 3.95E-200 | Holliday junction recognition protein [Source:HGNC Symbol;Acc:HGNC:25444]       | chr2  | - |
| [99]  | RNU5E-1    | ENSG00000199347.1      | -3.06963 | 4.06E-08  | RNA, U5E small nuclear 1 [Source:HGNC Symbol;Acc:HGNC:10215]                    | chr1  | + |
| [100] | HIST1H2AG  | ENSG00000196787.3      | -3.06878 | 1.30E-246 | H2A clustered histone 11 [Source:HGNC Symbol;Acc:HGNC:4737]                     | chr6  | + |
| [101] | TSSK5P     | ENSG00000227473.1      | -3.0571  | 1.21E-05  | testis specific serine kinase 5, pseudogene [Source:HGNC Symbol;Acc:HGNC:31931] | chr8  | - |
| [102] | SCARNA22   | ENSG00000249784.1      | -3.05367 | 2.80E-07  | small Cajal body-specific RNA 22 [Source:HGNC Symbol;Acc:HGNC:32580]            | chr4  | + |
| [103] | PPFIA2     | ENSG00000139220.1<br>6 | -3.05074 | 3.58E-06  | PTPRF interacting protein alpha 2 [Source:HGNC Symbol;Acc:HGNC:9246]            | chr12 | - |
| [104] | AC055736.1 | ENSG00000257500.1      | -3.04448 | 1.33E-05  | novel transcript, antisense to KRT75 and KRT82                                  | chr12 | + |
| [105] | FP671120.2 | ENSG00000277437.1      | -3.03865 | 2.78E-09  | nan                                                                             | chr21 | + |
| [106] | HIST1H2BO  | ENSG00000274641.1      | -3.03279 | 6.23E-141 | H2B clustered histone 17 [Source:HGNC Symbol;Acc:HGNC:4758]                     | chr6  | + |
| [107] | AC009119.1 | ENSG00000260228.6      | -3.02904 | 7.90E-06  | novel transcript, antisense to CDH13                                            | chr16 | - |
| [108] | HIST1H3A   | ENSG00000275714.1      | -3.02712 | 3.32E-65  | H3 clustered histone 1 [Source:HGNC Symbol;Acc:HGNC:4766]                       | chr6  | + |
| [109] | MKI67      | ENSG00000148773.1<br>4 | -3.02164 | 0         | marker of proliferation Ki-67 [Source:HGNC Symbol;Acc:HGNC:7107]                | chr10 | - |
| [110] | HIST1H2BL  | ENSG00000185130.5      | -3.01734 | 7.02E-58  | H2B clustered histone 13 [Source:HGNC Symbol;Acc:HGNC:4748]                     | chr6  | - |
| [111] | TERT       | ENSG00000164362.2<br>0 | -3.015   | 1.63E-05  | telomerase reverse transcriptase [Source:HGNC Symbol;Acc:HGNC:11730]            | chr5  | - |
| [112] | CR392039.1 | ENSG00000264063.1      | -3.01096 | 4.13E-09  | nan                                                                             | chr21 | + |
| [113] | SH3BP1     | ENSG00000100092.2<br>3 | -2.98745 | 1.93E-10  | SH3 domain binding protein 1 [Source:HGNC Symbol;Acc:HGNC:10824]                | chr22 | + |

|       |            |                        |          |           |                                                                                                  |       |   |
|-------|------------|------------------------|----------|-----------|--------------------------------------------------------------------------------------------------|-------|---|
| [114] | KIF20A     | ENSG00000112984.1<br>2 | -2.98637 | 5.51E-175 | kinesin family member 20A<br>[Source:HGNC<br>Symbol;Acc:HGNC:9787]                               | chr5  | + |
| [115] | HIST1H4B   | ENSG00000278705.1      | -2.98636 | 4.95E-233 | H4 clustered histone 2<br>[Source:HGNC<br>Symbol;Acc:HGNC:4789]                                  | chr6  | - |
| [116] | UHRF1      | ENSG00000276043.5      | -2.9758  | 2.01E-137 | ubiquitin like with PHD and ring<br>finger domains 1 [Source:HGNC<br>Symbol;Acc:HGNC:12556]      | chr19 | + |
| [117] | SPC25      | ENSG00000152253.9      | -2.93556 | 1.76E-17  | SPC25 component of NDC80<br>kinetochore complex<br>[Source:HGNC<br>Symbol;Acc:HGNC:24031]        | chr2  | - |
| [118] | POLA2      | ENSG00000014138.9      | -2.92088 | 2.67E-30  | DNA polymerase alpha 2,<br>accessory subunit<br>[Source:HGNC<br>Symbol;Acc:HGNC:30073]           | chr11 | + |
| [119] | PLSCR3     | ENSG00000187838.1<br>7 | -2.91791 | 3.36E-16  | phospholipid scramblase 3<br>[Source:HGNC<br>Symbol;Acc:HGNC:16495]                              | chr17 | - |
| [120] | ARL17B     | ENSG00000228696.9      | -2.91327 | 3.94E-05  | ADP ribosylation factor like<br>GTPase 17B [Source:HGNC<br>Symbol;Acc:HGNC:32387]                | chr17 | - |
| [121] | AC051619.7 | ENSG00000259932.1      | -2.91071 | 4.68E-06  | novel transcript                                                                                 | chr15 | - |
| [122] | RNU6ATAC   | ENSG00000221676.1      | -2.90805 | 4.14E-06  | RNA, U6atac small nuclear (U12-<br>dependent splicing)<br>[Source:HGNC<br>Symbol;Acc:HGNC:34017] | chr9  | - |
| [123] | ANLN       | ENSG00000011426.1<br>1 | -2.89896 | 0         | anillin actin binding protein<br>[Source:HGNC<br>Symbol;Acc:HGNC:14082]                          | chr7  | + |
| [124] | SNORA52    | ENSG00000199785.1      | -2.89759 | 3.67E-07  | small nucleolar RNA, H/ACA<br>box 52 [Source:HGNC<br>Symbol;Acc:HGNC:32645]                      | chr11 | + |
| [125] | AP001042.1 | ENSG00000205622.1<br>1 | -2.88655 | 4.55E-05  | novel transcript                                                                                 | chr21 | - |
| [126] | RN7SL823P  | ENSG00000263595.2      | -2.88177 | 6.69E-12  | RNA, 7SL, cytoplasmic 823,<br>pseudogene [Source:HGNC<br>Symbol;Acc:HGNC:46839]                  | chr19 | - |
| [127] | HIST1H3C   | ENSG00000287080.1      | -2.88176 | 4.66E-242 | H3 clustered histone 3<br>[Source:HGNC<br>Symbol;Acc:HGNC:4768]                                  | chr6  | + |
| [128] | HIST1H2AE  | ENSG00000277075.2      | -2.87113 | 9.78E-152 | H2A clustered histone 8<br>[Source:HGNC<br>Symbol;Acc:HGNC:4724]                                 | chr6  | + |



|       |            |                    |          |           |                                                                                                  |       |   |
|-------|------------|--------------------|----------|-----------|--------------------------------------------------------------------------------------------------|-------|---|
| [129] | HAS1       | ENSG00000105509.10 | -2.87033 | 2.45E-151 | hyaluronan synthase 1<br>[Source:HGNC Symbol;Acc:HGNC:4818]                                      | chr19 | - |
| [130] | CNIH2      | ENSG00000174871.11 | -2.83157 | 9.73E-06  | cornichon family AMPA receptor auxiliary protein 2<br>[Source:HGNC Symbol;Acc:HGNC:28744]        | chr11 | + |
| [131] | LMNB1      | ENSG00000113368.12 | -2.82902 | 1.54E-90  | lamin B1 [Source:HGNC Symbol;Acc:HGNC:6637]                                                      | chr5  | + |
| [132] | SHCBP1     | ENSG00000171241.9  | -2.82648 | 7.39E-171 | SHC binding and spindle associated 1 [Source:HGNC Symbol;Acc:HGNC:29547]                         | chr16 | - |
| [133] | RNY1       | ENSG00000201098.1  | -2.82472 | 9.16E-08  | RNA, Ro60-associated Y1<br>[Source:HGNC Symbol;Acc:HGNC:10242]                                   | chr7  | - |
| [134] | WDR90      | ENSG00000161996.19 | -2.81571 | 8.71E-32  | WD repeat domain 90<br>[Source:HGNC Symbol;Acc:HGNC:26960]                                       | chr16 | + |
| [135] | NFATC4     | ENSG00000100968.14 | -2.81357 | 2.13E-06  | nuclear factor of activated T cells 4<br>[Source:HGNC Symbol;Acc:HGNC:7778]                      | chr14 | + |
| [136] | KCNJ8      | ENSG00000121361.5  | -2.80854 | 8.80E-05  | potassium inwardly rectifying channel subfamily J member 8<br>[Source:HGNC Symbol;Acc:HGNC:6269] | chr12 | - |
| [137] | HIF1A-AS3  | ENSG00000258667.2  | -2.79822 | 9.23E-05  | HIF1A antisense RNA 3<br>[Source:HGNC Symbol;Acc:HGNC:54284]                                     | chr14 | - |
| [138] | AC010422.3 | ENSG00000269242.1  | -2.78553 | 2.73E-11  | novel transcript                                                                                 | chr19 | - |
| [139] | TLCD3B     | ENSG00000149926.13 | -2.78339 | 0.000107  | TLC domain containing 3B<br>[Source:HGNC Symbol;Acc:HGNC:25295]                                  | chr16 | - |
| [140] | GREM2      | ENSG00000180875.5  | -2.78022 | 0.000104  | gremlin 2, DAN family BMP antagonist<br>[Source:HGNC Symbol;Acc:HGNC:17655]                      | chr1  | - |
| [141] | RN7SL396P  | ENSG00000244642.3  | -2.77819 | 0         | RNA, 7SL, cytoplasmic 396, pseudogene<br>[Source:HGNC Symbol;Acc:HGNC:46412]                     | chr8  | + |
| [142] | DLGAP5     | ENSG00000126787.13 | -2.77807 | 1.16E-205 | DLG associated protein 5<br>[Source:HGNC Symbol;Acc:HGNC:16864]                                  | chr14 | - |
| [143] | AC211433.1 | ENSG00000232729.8  | -2.77702 | 0.00011   | novel transcript, antisense to GTF2I                                                             | chr7  | - |

|       |           |                        |          |               |                                                                                                   |       |   |
|-------|-----------|------------------------|----------|---------------|---------------------------------------------------------------------------------------------------|-------|---|
| [144] | FOXC2-AS1 | ENSG00000260944.1      | -2.77653 | 0.000104      | FOXC2 antisense RNA 1<br>[Source:HGNC<br>Symbol;Acc:HGNC:50665]                                   | chr16 | - |
| [145] | SERTM2    | ENSG00000260802.1      | -2.77609 | 1.75E-05      | serine rich and transmembrane<br>domain containing 2<br>[Source:HGNC<br>Symbol;Acc:HGNC:48576]    | chrX  | + |
| [146] | HIST1H2BH | ENSG00000275713.2      | -2.76478 | 3.69E-<br>206 | H2B clustered histone 9<br>[Source:HGNC<br>Symbol;Acc:HGNC:4755]                                  | chr6  | + |
| [147] | CDCA8     | ENSG00000134690.1<br>1 | -2.76171 | 2.14E-<br>137 | cell division cycle associated 8<br>[Source:HGNC<br>Symbol;Acc:HGNC:14629]                        | chr1  | + |
| [148] | INSYN2B   | ENSG00000204767.4      | -2.75948 | 1.13E-99      | inhibitory synaptic factor family<br>member 2B [Source:HGNC<br>Symbol;Acc:HGNC:37271]             | chr5  | - |
| [149] | RN7SL217P | ENSG00000264706.2      | -2.75907 | 9.00E-08      | RNA, 7SL, cytoplasmic 217,<br>pseudogene [Source:HGNC<br>Symbol;Acc:HGNC:46233]                   | chr3  | - |
| [150] | SLC14A1   | ENSG00000141469.1<br>8 | -2.75716 | 0.00012       | solute carrier family 14 member<br>1 (Kidd blood group)<br>[Source:HGNC<br>Symbol;Acc:HGNC:10918] | chr18 | + |
| [151] | C10orf55  | ENSG00000222047.8      | -2.75247 | 1.75E-15      | chromosome 10 putative open<br>reading frame 55 [Source:HGNC<br>Symbol;Acc:HGNC:31008]            | chr10 | - |
| [152] | NCAPH     | ENSG00000121152.1<br>0 | -2.74983 | 2.23E-<br>135 | non-SMC condensin I complex<br>subunit H [Source:HGNC<br>Symbol;Acc:HGNC:1112]                    | chr2  | + |
| [153] | TOP2A     | ENSG00000131747.1<br>5 | -2.74719 | 0             | DNA topoisomerase II alpha<br>[Source:HGNC<br>Symbol;Acc:HGNC:11989]                              | chr17 | - |
| [154] | RN7SL151P | ENSG00000244230.3      | -2.73451 | 6.70E-12      | RNA, 7SL, cytoplasmic 151,<br>pseudogene [Source:HGNC<br>Symbol;Acc:HGNC:46167]                   | chr9  | + |
| [155] | EPSTI1    | ENSG00000133106.1<br>4 | -2.73306 | 0.000143      | epithelial stromal interaction 1<br>[Source:HGNC<br>Symbol;Acc:HGNC:16465]                        | chr13 | - |
| [156] | CDC20     | ENSG00000117399.1<br>4 | -2.72969 | 7.87E-<br>194 | cell division cycle 20<br>[Source:HGNC<br>Symbol;Acc:HGNC:1723]                                   | chr1  | + |
| [157] | Z94721.3  | ENSG00000285730.1      | -2.72171 | 0.000153      | novel transcript                                                                                  | chr6  | - |
| [158] | WNT5A-AS1 | ENSG00000244586.1      | -2.71633 | 1.57E-06      | WNT5A antisense RNA 1<br>[Source:HGNC<br>Symbol;Acc:HGNC:40616]                                   | chr3  | + |

|       |           |                        |          |               |                                                                                                                      |       |   |
|-------|-----------|------------------------|----------|---------------|----------------------------------------------------------------------------------------------------------------------|-------|---|
| [159] | NUF2      | ENSG00000143228.1<br>3 | -2.71306 | 6.69E-70      | NUF2 component of NDC80<br>kinetochore complex<br>[Source:HGNC<br>Symbol;Acc:HGNC:14621]                             | chr1  | + |
| [160] | HGF       | ENSG0000019991.1<br>8  | -2.70999 | 2.98E-93      | hepatocyte growth factor<br>[Source:HGNC<br>Symbol;Acc:HGNC:4893]                                                    | chr7  | - |
| [161] | GDF5      | ENSG00000125965.9      | -2.70432 | 1.13E-29      | growth differentiation factor 5<br>[Source:HGNC<br>Symbol;Acc:HGNC:4220]                                             | chr20 | - |
| [162] | MIR3651   | ENSG00000281156.1      | -2.70147 | 8.79E-06      | microRNA 3651 [Source:HGNC<br>Symbol;Acc:HGNC:38897]                                                                 | chr9  | - |
| [163] | RN7SL366P | ENSG00000266128.2      | -2.69153 | 5.59E-20      | RNA, 7SL, cytoplasmic 366,<br>pseudogene [Source:HGNC<br>Symbol;Acc:HGNC:46382]                                      | chr6  | + |
| [164] | HIST1H4D  | ENSG00000277157.1      | -2.69039 | 1.87E-<br>119 | H4 clustered histone 4<br>[Source:HGNC<br>Symbol;Acc:HGNC:4782]                                                      | chr6  | - |
| [165] | KIF23     | ENSG00000137807.1<br>5 | -2.66794 | 5.41E-<br>281 | kinesin family member 23<br>[Source:HGNC<br>Symbol;Acc:HGNC:6392]                                                    | chr15 | + |
| [166] | MT-ND3    | ENSG00000198840.2      | -2.66624 | 1.64E-<br>109 | mitochondrially encoded<br>NADH:ubiquinone<br>oxidoreductase core subunit 3<br>[Source:HGNC<br>Symbol;Acc:HGNC:7458] | chrM  | + |
| [167] | CDCA7     | ENSG00000144354.1<br>4 | -2.66078 | 1.03E-42      | cell division cycle associated 7<br>[Source:HGNC<br>Symbol;Acc:HGNC:14628]                                           | chr2  | + |
| [168] | ADGRF2    | ENSG00000164393.8      | -2.65953 | 1.17E-05      | adhesion G protein-coupled<br>receptor F2 [Source:HGNC<br>Symbol;Acc:HGNC:18991]                                     | chr6  | + |
| [169] | FAM110A   | ENSG00000125898.1<br>3 | -2.65745 | 5.20E-07      | family with sequence similarity<br>110 member A [Source:HGNC<br>Symbol;Acc:HGNC:16188]                               | chr20 | + |
| [170] | CALML4    | ENSG00000129007.1<br>4 | -2.65275 | 6.30E-05      | calmodulin like 4 [Source:HGNC<br>Symbol;Acc:HGNC:18445]                                                             | chr15 | - |
| [171] | SNORA79B  | ENSG00000222489.1      | -2.65037 | 2.71E-05      | small nucleolar RNA, H/ACA<br>box 79B [Source:HGNC<br>Symbol;Acc:HGNC:52222]                                         | chr14 | - |
| [172] | HIST1H4C  | ENSG00000197061.4      | -2.64899 | 9.40E-<br>192 | H4 clustered histone 3<br>[Source:HGNC<br>Symbol;Acc:HGNC:4787]                                                      | chr6  | + |
| [173] | U2        | ENSG00000274452.1      | -2.64552 | 0.00026       | U2 spliceosomal RNA<br>[Source:RFAM;Acc:RF00004]                                                                     | chr17 | - |

|       |            |                    |          |           |                                                                                              |       |   |
|-------|------------|--------------------|----------|-----------|----------------------------------------------------------------------------------------------|-------|---|
| [174] | CDC20P1    | ENSG00000231007.5  | -2.64409 | 1.46E-20  | cell division cycle 20 pseudogene 1 [Source:HGNC Symbol;Acc:HGNC:29487]                      | chr9  | + |
| [175] | GTSE1      | ENSG00000075218.19 | -2.64116 | 1.18E-88  | G2 and S-phase expressed 1 [Source:HGNC Symbol;Acc:HGNC:13698]                               | chr22 | + |
| [176] | RN7SL734P  | ENSG00000243420.3  | -2.63932 | 0.000131  | RNA, 7SL, cytoplasmic 734, pseudogene [Source:HGNC Symbol;Acc:HGNC:46750]                    | chr12 | - |
| [177] | AC112777.1 | ENSG00000256663.1  | -2.63569 | 3.35E-41  | ubiquitin-like with PHD and ring finger domains 1 (UHRF1) pseudogene                         | chr12 | + |
| [178] | CCNA2      | ENSG00000145386.10 | -2.63378 | 2.13E-220 | cyclin A2 [Source:HGNC Symbol;Acc:HGNC:1578]                                                 | chr4  | - |
| [179] | NRM        | ENSG00000137404.14 | -2.63145 | 3.16E-05  | nurim [Source:HGNC Symbol;Acc:HGNC:8003]                                                     | chr6  | - |
| [180] | PALMD      | ENSG00000099260.11 | -2.62634 | 1.26E-135 | palmdelphin [Source:HGNC Symbol;Acc:HGNC:15846]                                              | chr1  | + |
| [181] | TPM1-AS    | ENSG00000259498.1  | -2.6257  | 9.90E-11  | TPM1 antisense RNA [Source:HGNC Symbol;Acc:HGNC:53635]                                       | chr15 | - |
| [182] | APLN       | ENSG00000171388.12 | -2.62259 | 2.71E-22  | apelin [Source:HGNC Symbol;Acc:HGNC:16665]                                                   | chrX  | - |
| [183] | PKMYT1     | ENSG00000127564.17 | -2.62252 | 2.28E-37  | protein kinase, membrane associated tyrosine/threonine 1 [Source:HGNC Symbol;Acc:HGNC:29650] | chr16 | - |
| [184] | RN7SL3     | ENSG00000278771.1  | -2.60583 | 0         | RNA component of signal recognition particle 7SL3 [Source:HGNC Symbol;Acc:HGNC:23135]        | chr14 | - |
| [185] | BUB1       | ENSG00000169679.15 | -2.60346 | 2.69E-225 | BUB1 mitotic checkpoint serine/threonine kinase [Source:HGNC Symbol;Acc:HGNC:1148]           | chr2  | - |
| [186] | CENPE      | ENSG00000138778.12 | -2.60046 | 0         | centromere protein E [Source:HGNC Symbol;Acc:HGNC:1856]                                      | chr4  | - |
| [187] | UBE2C      | ENSG00000175063.17 | -2.59985 | 1.66E-224 | ubiquitin conjugating enzyme E2 C [Source:HGNC Symbol;Acc:HGNC:15937]                        | chr20 | + |
| [188] | ASTN2-AS1  | ENSG00000229105.1  | -2.59882 | 0.00035   | ASTN2 antisense RNA 1 [Source:HGNC Symbol;Acc:HGNC:51175]                                    | chr9  | + |

|       |            |                        |          |               |                                                                                          |       |   |
|-------|------------|------------------------|----------|---------------|------------------------------------------------------------------------------------------|-------|---|
| [189] | AC005586.1 | ENSG00000240449.1      | -2.59351 | 0.000369      | REPIN1 antisense RNA 1<br>[Source:HGNC<br>Symbol;Acc:HGNC:41201]                         | chr7  | - |
| [190] | RN7SL77P   | ENSG00000240837.3      | -2.58789 | 1.52E-07      | RNA, 7SL, cytoplasmic 77,<br>pseudogene [Source:HGNC<br>Symbol;Acc:HGNC:46093]           | chr14 | + |
| [191] | SNORA71A   | ENSG00000225091.3      | -2.58624 | 2.07E-06      | small nucleolar RNA, H/ACA<br>box 71A [Source:HGNC<br>Symbol;Acc:HGNC:10232]             | chr20 | - |
| [192] | AC099850.3 | ENSG00000265415.1      | -2.5781  | 1.27E-14      | novel transcript, antisense to<br>PRR11                                                  | chr17 | - |
| [193] | HMMR       | ENSG00000072571.2<br>0 | -2.57793 | 3.15E-<br>151 | hyaluronan mediated motility<br>receptor [Source:HGNC<br>Symbol;Acc:HGNC:5012]           | chr5  | + |
| [194] | HIST1H2AM  | ENSG00000278677.1      | -2.57548 | 1.20E-<br>143 | H2A clustered histone 17<br>[Source:HGNC<br>Symbol;Acc:HGNC:4735]                        | chr6  | - |
| [195] | RN7SL5P    | ENSG00000265735.2      | -2.56252 | 0             | RNA, 7SL, cytoplasmic 5,<br>pseudogene [Source:HGNC<br>Symbol;Acc:HGNC:10040]            | chr9  | + |
| [196] | KIF2C      | ENSG00000142945.1<br>3 | -2.56156 | 2.83E-<br>173 | kinesin family member 2C<br>[Source:HGNC<br>Symbol;Acc:HGNC:6393]                        | chr1  | + |
| [197] | NEURL1B    | ENSG00000214357.9      | -2.55977 | 8.84E-56      | neuralized E3 ubiquitin protein<br>ligase 1B [Source:HGNC<br>Symbol;Acc:HGNC:35422]      | chr5  | + |
| [198] | HIST1H2BE  | ENSG00000274290.2      | -2.55352 | 4.36E-72      | H2B clustered histone 6<br>[Source:HGNC<br>Symbol;Acc:HGNC:4753]                         | chr6  | + |
| [199] | RN7SL4P    | ENSG00000263740.2      | -2.54139 | 0             | RNA, 7SL, cytoplasmic 4,<br>pseudogene [Source:HGNC<br>Symbol;Acc:HGNC:10039]            | chr3  | + |
| [200] | E2F8       | ENSG00000129173.1<br>3 | -2.53701 | 2.05E-55      | E2F transcription factor 8<br>[Source:HGNC<br>Symbol;Acc:HGNC:24727]                     | chr11 | - |
| [201] | CCDC107    | ENSG00000159884.1<br>2 | -2.52495 | 8.11E-05      | coiled-coil domain containing<br>107 [Source:HGNC<br>Symbol;Acc:HGNC:28465]              | chr9  | + |
| [202] | LINC01085  | ENSG00000248698.6      | -2.52461 | 3.32E-15      | long intergenic non-protein<br>coding RNA 1085<br>[Source:HGNC<br>Symbol;Acc:HGNC:27198] | chr4  | + |
| [203] | RN7SKP175  | ENSG00000275558.1      | -2.52197 | 4.39E-19      | RN7SK pseudogene 175<br>[Source:HGNC<br>Symbol;Acc:HGNC:45899]                           | chr8  | + |

|       |           |                        |          |           |                                                                                                     |       |   |
|-------|-----------|------------------------|----------|-----------|-----------------------------------------------------------------------------------------------------|-------|---|
| [204] | FAM83D    | ENSG00000101447.1<br>5 | -2.5116  | 1.75E-127 | family with sequence similarity 83 member D [Source:HGNC Symbol;Acc:HGNC:16122]                     | chr20 | + |
| [205] | NDC80     | ENSG00000080986.1<br>3 | -2.50818 | 3.61E-121 | NDC80 kinetochore complex component [Source:HGNC Symbol;Acc:HGNC:16909]                             | chr18 | + |
| [206] | RN7SL472P | ENSG00000240457.3      | -2.50607 | 1.73E-13  | RNA, 7SL, cytoplasmic 472, pseudogene [Source:HGNC Symbol;Acc:HGNC:46488]                           | chr14 | - |
| [207] | KIF14     | ENSG00000118193.1<br>2 | -2.4993  | 4.13E-152 | kinesin family member 14 [Source:HGNC Symbol;Acc:HGNC:19181]                                        | chr1  | - |
| [208] | AURKB     | ENSG00000178999.1<br>3 | -2.49812 | 1.11E-71  | aurora kinase B [Source:HGNC Symbol;Acc:HGNC:11390]                                                 | chr17 | - |
| [209] | RN7SL665P | ENSG00000264169.2      | -2.4957  | 7.28E-09  | RNA, 7SL, cytoplasmic 665, pseudogene [Source:HGNC Symbol;Acc:HGNC:46681]                           | chr9  | + |
| [210] | HIST1H2BN | ENSG00000233822.4      | -2.4919  | 3.75E-154 | H2B clustered histone 15 [Source:HGNC Symbol;Acc:HGNC:4749]                                         | chr6  | + |
| [211] | AHRR      | ENSG00000063438.1<br>7 | -2.49069 | 7.68E-08  | aryl-hydrocarbon receptor repressor [Source:HGNC Symbol;Acc:HGNC:346]                               | chr5  | + |
| [212] | DMBX1     | ENSG00000197587.1<br>0 | -2.48493 | 0.000222  | diencephalon/mesencephalon homeobox 1 [Source:HGNC Symbol;Acc:HGNC:19026]                           | chr1  | + |
| [213] | RN7SL735P | ENSG00000244044.3      | -2.47976 | 2.85E-09  | RNA, 7SL, cytoplasmic 735, pseudogene [Source:HGNC Symbol;Acc:HGNC:46751]                           | chr17 | + |
| [214] | 7SK       | ENSG00000271394.1      | -2.47772 | 0         | 7SK RNA [Source:RFAM;Acc:RF00100]                                                                   | chr17 | + |
| [215] | RPSAP52   | ENSG00000241749.4      | -2.47653 | 8.31E-39  | ribosomal protein SA pseudogene 52 [Source:HGNC Symbol;Acc:HGNC:35752]                              | chr12 | - |
| [216] | NCAPG     | ENSG00000109805.1<br>0 | -2.47341 | 2.14E-300 | non-SMC condensin I complex subunit G [Source:HGNC Symbol;Acc:HGNC:24304]                           | chr4  | + |
| [217] | CENPF     | ENSG00000117724.1<br>3 | -2.47284 | 0         | centromere protein F [Source:HGNC Symbol;Acc:HGNC:1857]                                             | chr1  | + |
| [218] | HSP90AA5P | ENSG00000205955.4      | -2.47193 | 0.000786  | heat shock protein 90 alpha family class A member 5, pseudogene [Source:HGNC Symbol;Acc:HGNC:32535] | chr3  | + |

|       |           |                        |          |           |                                                                                          |       |   |
|-------|-----------|------------------------|----------|-----------|------------------------------------------------------------------------------------------|-------|---|
| [219] | BUB1B     | ENSG00000156970.1<br>2 | -2.47177 | 1.40E-182 | BUB1 mitotic checkpoint serine/threonine kinase B<br>[Source:HGNC Symbol;Acc:HGNC:1149]  | chr15 | + |
| [220] | TTK       | ENSG00000112742.1<br>0 | -2.46797 | 2.87E-75  | TTK protein kinase<br>[Source:HGNC Symbol;Acc:HGNC:12401]                                | chr6  | + |
| [221] | TROAP     | ENSG00000135451.1<br>3 | -2.46695 | 2.33E-62  | trophinin associated protein<br>[Source:HGNC Symbol;Acc:HGNC:12327]                      | chr12 | + |
| [222] | KIF15     | ENSG00000163808.1<br>7 | -2.45934 | 2.47E-50  | kinesin family member 15<br>[Source:HGNC Symbol;Acc:HGNC:17273]                          | chr3  | + |
| [223] | NDP       | ENSG00000124479.1<br>1 | -2.45659 | 1.00E-41  | norrin cystine knot growth factor NDP<br>[Source:HGNC Symbol;Acc:HGNC:7678]              | chrX  | - |
| [224] | HIST1H4H  | ENSG00000158406.4      | -2.45528 | 2.73E-149 | H4 clustered histone 8<br>[Source:HGNC Symbol;Acc:HGNC:4788]                             | chr6  | - |
| [225] | NEXN      | ENSG00000162614.1<br>8 | -2.45088 | 5.67E-08  | nexilin F-actin binding protein<br>[Source:HGNC Symbol;Acc:HGNC:29557]                   | chr1  | + |
| [226] | GIN51     | ENSG00000101003.1<br>0 | -2.44746 | 5.20E-35  | GIN5 complex subunit 1<br>[Source:HGNC Symbol;Acc:HGNC:28980]                            | chr20 | + |
| [227] | RN7SL660P | ENSG00000278746.1      | -2.44632 | 1.13E-07  | RNA, 7SL, cytoplasmic 660, pseudogene<br>[Source:HGNC Symbol;Acc:HGNC:46676]             | chr14 | + |
| [228] | H2AFZP1   | ENSG00000213440.2      | -2.44574 | 0.001055  | H2A.Z histone pseudogene 1<br>[Source:HGNC Symbol;Acc:HGNC:4742]                         | chr21 | - |
| [229] | TMEM160   | ENSG00000130748.7      | -2.44556 | 1.73E-09  | transmembrane protein 160<br>[Source:HGNC Symbol;Acc:HGNC:26042]                         | chr19 | - |
| [230] | RN7SL1    | ENSG00000276168.1      | -2.43939 | 0         | RNA component of signal recognition particle 7SL1<br>[Source:HGNC Symbol;Acc:HGNC:10038] | chr14 | + |
| [231] | CCNB1     | ENSG00000134057.1<br>5 | -2.4293  | 0         | cyclin B1<br>[Source:HGNC Symbol;Acc:HGNC:1579]                                          | chr5  | + |
| [232] | MIR3648-2 | ENSG00000264462.1      | -2.42527 | 5.28E-08  | microRNA 3648-2<br>[Source:HGNC Symbol;Acc:HGNC:50843]                                   | chr21 | + |
| [233] | MIR3648-1 | ENSG00000275708.1      | -2.42527 | 5.28E-08  | microRNA 3648-1<br>[Source:HGNC Symbol;Acc:HGNC:38941]                                   | chr21 | + |

|       |           |                        |          |               |                                                                                                   |       |   |
|-------|-----------|------------------------|----------|---------------|---------------------------------------------------------------------------------------------------|-------|---|
| [234] | SNORD94   | ENSG00000208772.1      | -2.42239 | 0.000619      | small nucleolar RNA, C/D box 94<br>[Source:HGNC<br>Symbol;Acc:HGNC:32756]                         | chr2  | + |
| [235] | NES       | ENSG00000132688.1<br>1 | -2.42141 | 3.73E-27      | nestin [Source:HGNC<br>Symbol;Acc:HGNC:7756]                                                      | chr1  | - |
| [236] | PRSS12    | ENSG00000164099.3      | -2.42098 | 3.44E-05      | serine protease 12<br>[Source:HGNC<br>Symbol;Acc:HGNC:9477]                                       | chr4  | - |
| [237] | ACSBG2    | ENSG00000130377.1<br>3 | -2.42041 | 0.001085      | acyl-CoA synthetase bubblegum<br>family member 2 [Source:HGNC<br>Symbol;Acc:HGNC:24174]           | chr19 | + |
| [238] | PGGHG     | ENSG00000142102.1<br>6 | -2.41405 | 0.000357      | protein-<br>glucosylgalactosylhydroxylysine<br>glucosidase [Source:HGNC<br>Symbol;Acc:HGNC:26210] | chr11 | + |
| [239] | BMS1P1    | ENSG00000204177.1<br>0 | -2.41194 | 0.001261      | BMS1 pseudogene 1<br>[Source:HGNC<br>Symbol;Acc:HGNC:23649]                                       | chr10 | + |
| [240] | TPX2      | ENSG00000088325.1<br>6 | -2.40914 | 0             | TPX2 microtubule nucleation<br>factor [Source:HGNC<br>Symbol;Acc:HGNC:1249]                       | chr20 | + |
| [241] | SNORA73B  | ENSG00000200087.1      | -2.40883 | 6.82E-<br>239 | small nucleolar RNA, H/ACA<br>box 73B [Source:HGNC<br>Symbol;Acc:HGNC:10116]                      | chr1  | + |
| [242] | INCENP    | ENSG00000149503.1<br>3 | -2.40868 | 1.40E-<br>123 | inner centromere protein<br>[Source:HGNC<br>Symbol;Acc:HGNC:6058]                                 | chr11 | + |
| [243] | CFAP299   | ENSG00000197826.1<br>1 | -2.40827 | 0.001167      | cilia and flagella associated<br>protein 299 [Source:HGNC<br>Symbol;Acc:HGNC:28554]               | chr4  | + |
| [244] | CA9       | ENSG00000107159.1<br>3 | -2.40714 | 1.55E-28      | carbonic anhydrase 9<br>[Source:HGNC<br>Symbol;Acc:HGNC:1383]                                     | chr9  | + |
| [245] | RN7SL518P | ENSG00000265486.2      | -2.40604 | 1.38E-05      | RNA, 7SL, cytoplasmic 518,<br>pseudogene [Source:HGNC<br>Symbol;Acc:HGNC:46534]                   | chr10 | - |
| [246] | PLK4      | ENSG00000142731.1<br>1 | -2.4056  | 2.81E-78      | polo like kinase 4 [Source:HGNC<br>Symbol;Acc:HGNC:11397]                                         | chr4  | + |
| [247] | CENPI     | ENSG00000102384.1<br>3 | -2.40484 | 2.09E-70      | centromere protein I<br>[Source:HGNC<br>Symbol;Acc:HGNC:3968]                                     | chrX  | + |
| [248] | KIF11     | ENSG00000138160.6      | -2.40215 | 7.17E-<br>262 | kinesin family member 11<br>[Source:HGNC<br>Symbol;Acc:HGNC:6388]                                 | chr10 | + |



|       |            |                        |          |           |                                                                                                          |       |   |
|-------|------------|------------------------|----------|-----------|----------------------------------------------------------------------------------------------------------|-------|---|
| [249] | AC091057.1 | ENSG00000187951.1<br>1 | -2.40097 | 1.54E-16  | novel transcript                                                                                         | chr15 | + |
| [250] | DEPDC1     | ENSG00000024526.1<br>7 | -2.3987  | 9.58E-181 | DEP domain containing 1<br>[Source:HGNC<br>Symbol;Acc:HGNC:22949]                                        | chr1  | - |
| [251] | CKAP2L     | ENSG00000169607.1<br>3 | -2.39839 | 2.11E-171 | cytoskeleton associated protein 2<br>like [Source:HGNC<br>Symbol;Acc:HGNC:26877]                         | chr2  | - |
| [252] | CLSPN      | ENSG00000092853.1<br>4 | -2.39503 | 5.34E-141 | claspin [Source:HGNC<br>Symbol;Acc:HGNC:19715]                                                           | chr1  | - |
| [253] | MCM10      | ENSG00000065328.1<br>6 | -2.39022 | 1.87E-74  | minichromosome maintenance<br>10 replication initiation factor<br>[Source:HGNC<br>Symbol;Acc:HGNC:18043] | chr10 | + |
| [254] | RN7SL546P  | ENSG00000239224.3      | -2.38345 | 2.21E-05  | RNA, 7SL, cytoplasmic 546,<br>pseudogene [Source:HGNC<br>Symbol;Acc:HGNC:46562]                          | chr14 | - |
| [255] | HIST2H2BE  | ENSG00000184678.1<br>0 | -2.38248 | 2.08E-291 | H2B clustered histone 21<br>[Source:HGNC<br>Symbol;Acc:HGNC:4760]                                        | chr1  | - |
| [256] | ELN-AS1    | ENSG00000232415.1      | -2.37981 | 0.001393  | ELN antisense RNA 1<br>[Source:HGNC<br>Symbol;Acc:HGNC:40212]                                            | chr7  | - |
| [257] | LCTL       | ENSG00000188501.1<br>1 | -2.37969 | 0.000323  | lactase like [Source:HGNC<br>Symbol;Acc:HGNC:15583]                                                      | chr15 | - |
| [258] | IQGAP3     | ENSG00000183856.1<br>1 | -2.37542 | 3.29E-94  | IQ motif containing GTPase<br>activating protein 3<br>[Source:HGNC<br>Symbol;Acc:HGNC:20669]             | chr1  | - |
| [259] | RN7SL645P  | ENSG00000240863.3      | -2.37086 | 0.000135  | RNA, 7SL, cytoplasmic 645,<br>pseudogene [Source:HGNC<br>Symbol;Acc:HGNC:46661]                          | chr16 | - |
| [260] | RN7SKP203  | ENSG00000200488.1      | -2.36877 | 0         | RN7SK pseudogene 203<br>[Source:HGNC<br>Symbol;Acc:HGNC:45927]                                           | chr2  | - |
| [261] | HAS2       | ENSG00000170961.7      | -2.36433 | 6.04E-10  | hyaluronan synthase 2<br>[Source:HGNC<br>Symbol;Acc:HGNC:4819]                                           | chr8  | - |
| [262] | CENPA      | ENSG00000115163.1<br>5 | -2.36139 | 8.02E-39  | centromere protein A<br>[Source:HGNC<br>Symbol;Acc:HGNC:1851]                                            | chr2  | + |
| [263] | PSRC1      | ENSG00000134222.1<br>6 | -2.36072 | 3.30E-61  | proline and serine rich coiled-<br>coil 1 [Source:HGNC<br>Symbol;Acc:HGNC:24472]                         | chr1  | - |

|       |            |                        |          |          |                                                                                                  |       |   |
|-------|------------|------------------------|----------|----------|--------------------------------------------------------------------------------------------------|-------|---|
| [264] | RN7SL2     | ENSG00000274012.1      | -2.35983 | 0        | RNA component of signal recognition particle 7SL2<br>[Source:HGNC Symbol;Acc:HGNC:23134]         | chr14 | - |
| [265] | U1         | ENSG00000274210.1      | -2.35952 | 1.10E-06 | RNA, variant U1 small nuclear 27<br>[Source:HGNC Symbol;Acc:HGNC:54431]                          | chr1  | + |
| [266] | AL591684.2 | ENSG00000254929.6      | -2.35794 | 0.001671 | novel transcript                                                                                 | chr10 | - |
| [267] | RN7SL113P  | ENSG00000278590.1      | -2.35567 | 0.001592 | RNA, 7SL, cytoplasmic 113, pseudogene<br>[Source:HGNC Symbol;Acc:HGNC:46129]                     | chr2  | + |
| [268] | CDCA3      | ENSG00000111665.1<br>1 | -2.35516 | 2.30E-49 | cell division cycle associated 3<br>[Source:HGNC Symbol;Acc:HGNC:14624]                          | chr12 | - |
| [269] | RN7SKP255  | ENSG00000200312.1      | -2.35403 | 0        | RN7SK pseudogene 255<br>[Source:HGNC Symbol;Acc:HGNC:45979]                                      | chr14 | + |
| [270] | RRM2       | ENSG00000171848.1<br>5 | -2.35169 | 0        | ribonucleotide reductase regulatory subunit M2<br>[Source:HGNC Symbol;Acc:HGNC:10452]            | chr2  | + |
| [271] | MRM2       | ENSG00000122687.1<br>8 | -2.35116 | 0.001714 | mitochondrial rRNA methyltransferase 2<br>[Source:HGNC Symbol;Acc:HGNC:16352]                    | chr7  | - |
| [272] | ATG10      | ENSG00000152348.1<br>6 | -2.34652 | 5.90E-14 | autophagy related 10<br>[Source:HGNC Symbol;Acc:HGNC:20315]                                      | chr5  | + |
| [273] | AC026951.1 | ENSG00000259358.1      | -2.33885 | 7.92E-11 | DEP domain containing 1 pseudogene 1<br>[Source:HGNC Symbol;Acc:HGNC:31125]                      | chr15 | - |
| [274] | ENO3       | ENSG00000108515.1<br>7 | -2.33736 | 9.54E-05 | enolase 3<br>[Source:HGNC Symbol;Acc:HGNC:3354]                                                  | chr17 | + |
| [275] | KCTD4      | ENSG00000180332.6      | -2.33525 | 5.22E-41 | potassium channel tetramerization domain containing 4<br>[Source:HGNC Symbol;Acc:HGNC:23227]     | chr13 | - |
| [276] | EIF4A1P9   | ENSG00000262953.1      | -2.33316 | 0.001903 | eukaryotic translation initiation factor 4A1 pseudogene 9<br>[Source:HGNC Symbol;Acc:HGNC:37928] | chr17 | - |
| [277] | AC090498.1 | ENSG00000279483.2      | -2.33112 | 2.94E-18 | ribosomal protein L41 (RPL41) pseudogene                                                         | chr7  | + |

|       |             |                        |          |           |                                                                                |       |   |
|-------|-------------|------------------------|----------|-----------|--------------------------------------------------------------------------------|-------|---|
| [278] | TEDC1       | ENSG00000185347.1<br>7 | -2.3299  | 3.25E-28  | tubulin epsilon and delta complex 1 [Source:HGNC Symbol;Acc:HGNC:20127]        | chr14 | + |
| [279] | AL589182.3  | ENSG00000286614.1      | -2.32921 | 0.001939  | novel pseudogene                                                               | chr14 | + |
| [280] | HIST2H2AB   | ENSG00000184270.5      | -2.32749 | 6.61E-56  | H2A clustered histone 21 [Source:HGNC Symbol;Acc:HGNC:20508]                   | chr1  | - |
| [281] | LINC00705   | ENSG00000225269.3      | -2.31909 | 0.001919  | long intergenic non-protein coding RNA 705 [Source:HGNC Symbol;Acc:HGNC:27874] | chr10 | + |
| [282] | SGO1        | ENSG00000129810.1<br>5 | -2.31656 | 3.42E-51  | shugoshin 1 [Source:HGNC Symbol;Acc:HGNC:25088]                                | chr3  | - |
| [283] | RPS10-NUDT3 | ENSG00000270800.3      | -2.31566 | 0.001445  | RPS10-NUDT3 readthrough [Source:HGNC Symbol;Acc:HGNC:49181]                    | chr6  | - |
| [284] | ARHGAP11A   | ENSG00000198826.1<br>1 | -2.31476 | 9.35E-116 | Rho GTPase activating protein 11A [Source:HGNC Symbol;Acc:HGNC:15783]          | chr15 | + |
| [285] | AC005480.1  | ENSG00000258891.1      | -2.31199 | 4.89E-05  | novel transcript, antisense to ZNF410                                          | chr14 | - |
| [286] | RN7SL752P   | ENSG00000239437.3      | -2.30511 | 1.56E-74  | RNA, 7SL, cytoplasmic 752, pseudogene [Source:HGNC Symbol;Acc:HGNC:46768]      | chr3  | + |
| [287] | AC007750.1  | ENSG00000236841.8      | -2.30394 | 0.000543  | novel transcript                                                               | chr2  | + |
| [288] | OPN1SW      | ENSG00000128617.2      | -2.30333 | 0.002099  | opsin 1, short wave sensitive [Source:HGNC Symbol;Acc:HGNC:1012]               | chr7  | - |
| [289] | FANCA       | ENSG00000187741.1<br>5 | -2.30214 | 1.15E-78  | FA complementation group A [Source:HGNC Symbol;Acc:HGNC:3582]                  | chr16 | - |
| [290] | AC231533.1  | ENSG00000232828.1      | -2.29955 | 0.002169  | novel transcript                                                               | chrX  | - |
| [291] | CDK1        | ENSG00000170312.1<br>6 | -2.29938 | 1.11E-208 | cyclin dependent kinase 1 [Source:HGNC Symbol;Acc:HGNC:1722]                   | chr10 | + |
| [292] | FBXO43      | ENSG00000156509.1<br>4 | -2.29815 | 1.78E-10  | F-box protein 43 [Source:HGNC Symbol;Acc:HGNC:28521]                           | chr8  | - |
| [293] | AC068831.7  | ENSG00000284946.1      | -2.2939  | 2.83E-05  | novel protein                                                                  | chr15 | - |

|       |                |                        |          |               |                                                                                           |       |   |
|-------|----------------|------------------------|----------|---------------|-------------------------------------------------------------------------------------------|-------|---|
| [294] | ORC1           | ENSG00000085840.1<br>3 | -2.2909  | 1.07E-63      | origin recognition complex<br>subunit 1 [Source:HGNC<br>Symbol;Acc:HGNC:8487]             | chr1  | - |
| [295] | CHTF18         | ENSG00000127586.1<br>7 | -2.28825 | 3.15E-22      | chromosome transmission<br>fidelity factor 18 [Source:HGNC<br>Symbol;Acc:HGNC:18435]      | chr16 | + |
| [296] | RAD54L         | ENSG00000085999.1<br>3 | -2.28468 | 1.02E-24      | RAD54 like [Source:HGNC<br>Symbol;Acc:HGNC:9826]                                          | chr1  | + |
| [297] | AC104852.1     | ENSG00000237810.3      | -2.28369 | 2.56E-06      | polo-like kinase 1 (Drosophila)<br>(PLK1) pseudogene                                      | chr8  | - |
| [298] | HIST1H2BG      | ENSG00000273802.2      | -2.28245 | 7.66E-<br>157 | H2B clustered histone 8<br>[Source:HGNC<br>Symbol;Acc:HGNC:4746]                          | chr6  | - |
| [299] | LINC02641      | ENSG00000230131.6      | -2.28171 | 0.002351      | long intergenic non-protein<br>coding RNA 2641<br>[Source:HGNC<br>Symbol;Acc:HGNC:54125]  | chr10 | + |
| [300] | SPC24          | ENSG00000161888.1<br>1 | -2.28116 | 4.60E-82      | SPC24 component of NDC80<br>kinetochore complex<br>[Source:HGNC<br>Symbol;Acc:HGNC:26913] | chr19 | - |
| [301] | RN7SL706P      | ENSG00000244677.3      | -2.27971 | 1.41E-07      | RNA, 7SL, cytoplasmic 706,<br>pseudogene [Source:HGNC<br>Symbol;Acc:HGNC:46722]           | chr14 | - |
| [302] | HIST2H2AA4     | ENSG00000272196.2      | -2.27402 | 0             | H2A clustered histone 19<br>[Source:HGNC<br>Symbol;Acc:HGNC:29668]                        | chr1  | + |
| [303] | HIST2H2AA3     | ENSG00000203812.2      | -2.27375 | 0             | H2A clustered histone 18<br>[Source:HGNC<br>Symbol;Acc:HGNC:4736]                         | chr1  | - |
| [304] | RNU5B-1        | ENSG00000200156.1      | -2.27068 | 1.40E-05      | RNA, U5B small nuclear 1<br>[Source:HGNC<br>Symbol;Acc:HGNC:10212]                        | chr15 | + |
| [305] | SNORA61        | ENSG00000278274.1      | -2.26912 | 0.000773      | small nucleolar RNA, H/ACA<br>box 61 [Source:HGNC<br>Symbol;Acc:HGNC:32655]               | chr1  | - |
| [306] | LINC01109      | ENSG00000271167.1      | -2.26677 | 5.47E-05      | long intergenic non-protein<br>coding RNA 1109<br>[Source:HGNC<br>Symbol;Acc:HGNC:49235]  | chr8  | + |
| [307] | AC013643.2     | ENSG00000253875.2      | -2.26429 | 0.002628      | novel transcript                                                                          | chr8  | + |
| [308] | PMF1-<br>BGLAP | ENSG00000260238.6      | -2.2616  | 0.002606      | PMF1-BGLAP readthrough<br>[Source:HGNC<br>Symbol;Acc:HGNC:42953]                          | chr1  | + |

|       |              |                    |          |           |                                                                                               |       |   |
|-------|--------------|--------------------|----------|-----------|-----------------------------------------------------------------------------------------------|-------|---|
| [309] | CARD16       | ENSG00000204397.8  | -2.25673 | 0.002707  | caspase recruitment domain family member 16<br>[Source:HGNC Symbol;Acc:HGNC:33701]            | chr11 | - |
| [310] | SNORA49      | ENSG00000208892.1  | -2.25222 | 2.01E-06  | small nucleolar RNA, H/ACA box 49<br>[Source:HGNC Symbol;Acc:HGNC:32642]                      | chr12 | + |
| [311] | RNU5A-1      | ENSG00000199568.1  | -2.2494  | 9.38E-06  | RNA, U5A small nuclear 1<br>[Source:HGNC Symbol;Acc:HGNC:10211]                               | chr15 | + |
| [312] | PBK          | ENSG00000168078.10 | -2.24862 | 8.46E-150 | PDZ binding kinase<br>[Source:HGNC Symbol;Acc:HGNC:18282]                                     | chr8  | - |
| [313] | CIP2A        | ENSG00000163507.14 | -2.24753 | 9.26E-136 | cellular inhibitor of PP2A<br>[Source:HGNC Symbol;Acc:HGNC:29302]                             | chr3  | - |
| [314] | KNL1         | ENSG00000137812.19 | -2.24644 | 2.18E-253 | kinetochore scaffold 1<br>[Source:HGNC Symbol;Acc:HGNC:24054]                                 | chr15 | + |
| [315] | RN7SL346P    | ENSG00000240470.3  | -2.23981 | 0.002931  | RNA, 7SL, cytoplasmic 346, pseudogene<br>[Source:HGNC Symbol;Acc:HGNC:46362]                  | chr15 | + |
| [316] | RPL41P1      | ENSG00000227063.5  | -2.23907 | 2.01E-19  | ribosomal protein L41 pseudogene 1<br>[Source:HGNC Symbol;Acc:HGNC:10356]                     | chr20 | + |
| [317] | POC1B-GALNT4 | ENSG00000259075.6  | -2.23418 | 0.003107  | POC1B-GALNT4 readthrough<br>[Source:HGNC Symbol;Acc:HGNC:42957]                               | chr12 | - |
| [318] | MT-ATP8      | ENSG00000228253.1  | -2.23228 | 4.21E-83  | mitochondrially encoded ATP synthase membrane subunit 8<br>[Source:HGNC Symbol;Acc:HGNC:7415] | chrM  | + |
| [319] | COL1A2       | ENSG00000164692.17 | -2.23158 | 0         | collagen type I alpha 2 chain<br>[Source:HGNC Symbol;Acc:HGNC:2198]                           | chr7  | + |
| [320] | LINC01723    | ENSG00000234265.2  | -2.22827 | 0.000807  | long intergenic non-protein coding RNA 1723<br>[Source:HGNC Symbol;Acc:HGNC:52511]            | chr20 | + |
| [321] | RN7SKP9      | ENSG00000201793.1  | -2.22767 | 3.36E-246 | RN7SK pseudogene 9<br>[Source:HGNC Symbol;Acc:HGNC:42627]                                     | chr13 | + |
| [322] | AC021127.1   | ENSG00000248719.2  | -2.22666 | 0.001369  | putative novel transcript                                                                     | chr4  | - |
| [323] | RN7SL507P    | ENSG00000239702.3  | -2.22569 | 2.05E-07  | RNA, 7SL, cytoplasmic 507, pseudogene<br>[Source:HGNC Symbol;Acc:HGNC:46523]                  | chr17 | - |

|       |             |                        |          |               |                                                                                 |       |   |
|-------|-------------|------------------------|----------|---------------|---------------------------------------------------------------------------------|-------|---|
| [324] | C3orf49     | ENSG00000163632.1<br>4 | -2.21635 | 0.003315      | chromosome 3 open reading<br>frame 49 [Source:HGNC<br>Symbol;Acc:HGNC:25190]    | chr3  | + |
| [325] | AURKA       | ENSG00000087586.1<br>7 | -2.20796 | 3.87E-<br>223 | aurora kinase A [Source:HGNC<br>Symbol;Acc:HGNC:11393]                          | chr20 | - |
| [326] | KIF4A       | ENSG00000090889.1<br>2 | -2.20414 | 3.29E-<br>117 | kinesin family member 4A<br>[Source:HGNC<br>Symbol;Acc:HGNC:13339]              | chrX  | + |
| [327] | Metazoa_SRP | ENSG00000278701.1      | -2.2031  | 0.002656      | Metazoan signal recognition<br>particle RNA<br>[Source:RFAM;Acc:RF00017]        | chr17 | + |
| [328] | UBL7-AS1    | ENSG00000247240.8      | -2.19903 | 0.003674      | UBL7 antisense RNA 1 (head to<br>head) [Source:HGNC<br>Symbol;Acc:HGNC:48614]   | chr15 | + |
| [329] | IFI44L      | ENSG00000137959.1<br>6 | -2.198   | 2.17E-26      | interferon induced protein 44<br>like [Source:HGNC<br>Symbol;Acc:HGNC:17817]    | chr1  | + |
| [330] | RNA5-8SN3   | ENSG00000275215.1      | -2.19616 | 0.000213      | RNA, 5.8S ribosomal N3<br>[Source:HGNC<br>Symbol;Acc:HGNC:53525]                | chr21 | + |
| [331] | 5_8S_rRNA   | ENSG00000277739.1      | -2.19616 | 0.000213      | 5.8S ribosomal RNA<br>[Source:RFAM;Acc:RF00002]                                 | chr21 | + |
| [332] | RNA5-8SN1   | ENSG00000278189.1      | -2.19616 | 0.000213      | RNA, 5.8S ribosomal N1<br>[Source:HGNC<br>Symbol;Acc:HGNC:53517]                | chr21 | + |
| [333] | RNA5-8SN2   | ENSG00000278233.1      | -2.19616 | 0.000213      | RNA, 5.8S ribosomal N2<br>[Source:HGNC<br>Symbol;Acc:HGNC:53521]                | chr21 | + |
| [334] | RN7SL97P    | ENSG00000242216.3      | -2.19614 | 0.000188      | RNA, 7SL, cytoplasmic 97,<br>pseudogene [Source:HGNC<br>Symbol;Acc:HGNC:46113]  | chr18 | - |
| [335] | RN7SL795P   | ENSG00000239748.3      | -2.19208 | 0.002618      | RNA, 7SL, cytoplasmic 795,<br>pseudogene [Source:HGNC<br>Symbol;Acc:HGNC:46811] | chr18 | + |
| [336] | RN7SL415P   | ENSG00000240961.3      | -2.18991 | 6.28E-05      | RNA, 7SL, cytoplasmic 415,<br>pseudogene [Source:HGNC<br>Symbol;Acc:HGNC:46431] | chr6  | + |
| [337] | SNORA70     | ENSG00000200237.1      | -2.18554 | 3.31E-05      | Small nucleolar RNA SNORA70<br>[Source:RFAM;Acc:RF00156]                        | chr19 | + |
| [338] | CCNF        | ENSG00000162063.1<br>3 | -2.18272 | 3.79E-51      | cyclin F [Source:HGNC<br>Symbol;Acc:HGNC:1591]                                  | chr16 | + |
| [339] | FN1         | ENSG00000115414.1<br>9 | -2.18107 | 0             | fibronectin 1 [Source:HGNC<br>Symbol;Acc:HGNC:3778]                             | chr2  | - |

|       |            |                    |          |           |                                                                                          |       |   |
|-------|------------|--------------------|----------|-----------|------------------------------------------------------------------------------------------|-------|---|
| [340] | HIST1H4J   | ENSG00000197238.4  | -2.17991 | 7.86E-102 | H4 clustered histone 11 [Source:HGNC Symbol;Acc:HGNC:4785]                               | chr6  | + |
| [341] | RN7SL607P  | ENSG00000278525.1  | -2.17912 | 9.38E-06  | RNA, 7SL, cytoplasmic 607, pseudogene [Source:HGNC Symbol;Acc:HGNC:46623]                | chr20 | - |
| [342] | HIST1H4K   | ENSG00000273542.1  | -2.17749 | 5.13E-101 | H4 clustered histone 12 [Source:HGNC Symbol;Acc:HGNC:4784]                               | chr6  | - |
| [343] | NUSAP1     | ENSG00000137804.14 | -2.17618 | 1.52E-08  | nucleolar and spindle associated protein 1 [Source:HGNC Symbol;Acc:HGNC:18538]           | chr15 | + |
| [344] | ARAP1-AS2  | ENSG00000245148.2  | -2.17564 | 0.004067  | ARAP1 antisense RNA 2 [Source:HGNC Symbol;Acc:HGNC:39994]                                | chr11 | + |
| [345] | AC100871.1 | ENSG00000250727.1  | -2.17497 | 0.004081  | neuropilin (NRP) and tolloid (TLL)-like 2 (NETO2) pseudogene                             | chr8  | + |
| [346] | ZBTB9      | ENSG00000213588.6  | -2.17351 | 0.00376   | zinc finger and BTB domain containing 9 [Source:HGNC Symbol;Acc:HGNC:28323]              | chr6  | + |
| [347] | AL360181.3 | ENSG00000254536.2  | -2.17259 | 0.004113  | novel protein                                                                            | chr10 | + |
| [348] | SNORA74D   | ENSG00000252213.1  | -2.17254 | 0.004133  | small nucleolar RNA, H/ACA box 74D [Source:HGNC Symbol;Acc:HGNC:52219]                   | chr5  | + |
| [349] | VTRNA1-3   | ENSG00000202515.1  | -2.17174 | 0.003016  | vault RNA 1-3 [Source:HGNC Symbol;Acc:HGNC:12656]                                        | chr5  | + |
| [350] | RRM2P3     | ENSG00000214018.3  | -2.17109 | 3.40E-18  | ribonucleotide reductase M2 polypeptide pseudogene 3 [Source:HGNC Symbol;Acc:HGNC:10455] | chrX  | - |
| [351] | KIF20B     | ENSG00000138182.14 | -2.17065 | 0         | kinesin family member 20B [Source:HGNC Symbol;Acc:HGNC:7212]                             | chr10 | + |
| [352] | TACC3      | ENSG00000013810.19 | -2.17034 | 2.21E-102 | transforming acidic coiled-coil containing protein 3 [Source:HGNC Symbol;Acc:HGNC:11524] | chr4  | + |
| [353] | CLCN3P1    | ENSG00000232000.3  | -2.16808 | 0.003387  | chloride voltage-gated channel 3 pseudogene 1 [Source:HGNC Symbol;Acc:HGNC:49775]        | chr9  | - |
| [354] | RN7SL836P  | ENSG00000241226.3  | -2.16274 | 1.58E-05  | RNA, 7SL, cytoplasmic 836, pseudogene [Source:HGNC Symbol;Acc:HGNC:46852]                | chr19 | + |

|       |             |                    |          |           |                                                                                             |       |   |
|-------|-------------|--------------------|----------|-----------|---------------------------------------------------------------------------------------------|-------|---|
| [355] | CKS1BP6     | ENSG00000178556.8  | -2.16246 | 9.52E-05  | CDC28 protein kinase regulatory subunit 1B pseudogene 6 [Source:HGNC Symbol;Acc:HGNC:24608] | chrX  | + |
| [356] | HIST2H2AC   | ENSG00000184260.5  | -2.16241 | 0         | H2A clustered histone 20 [Source:HGNC Symbol;Acc:HGNC:4738]                                 | chr1  | + |
| [357] | DIAPH3      | ENSG00000139734.19 | -2.16228 | 4.75E-53  | diaphanous related formin 3 [Source:HGNC Symbol;Acc:HGNC:15480]                             | chr13 | - |
| [358] | CCNB2       | ENSG00000157456.8  | -2.16101 | 1.32E-92  | cyclin B2 [Source:HGNC Symbol;Acc:HGNC:1580]                                                | chr15 | + |
| [359] | AC079949.3  | ENSG00000286016.1  | -2.16005 | 0.004383  | novel transcript                                                                            | chr12 | + |
| [360] | RN7SL678P   | ENSG00000263969.2  | -2.15974 | 2.03E-09  | RNA, 7SL, cytoplasmic 678, pseudogene [Source:HGNC Symbol;Acc:HGNC:46694]                   | chr21 | + |
| [361] | RN7SL608P   | ENSG00000239884.3  | -2.15829 | 2.86E-09  | RNA, 7SL, cytoplasmic 608, pseudogene [Source:HGNC Symbol;Acc:HGNC:46624]                   | chr17 | + |
| [362] | MSH5-SAPCD1 | ENSG00000255152.8  | -2.15798 | 0.002583  | MSH5-SAPCD1 readthrough (NMD candidate) [Source:HGNC Symbol;Acc:HGNC:41994]                 | chr6  | + |
| [363] | FJX1        | ENSG00000179431.7  | -2.15583 | 1.56E-58  | four-jointed box kinase 1 [Source:HGNC Symbol;Acc:HGNC:17166]                               | chr11 | + |
| [364] | H1FX-AS1    | ENSG00000206417.8  | -2.15457 | 0.002172  | H1-10 antisense RNA 1 [Source:HGNC Symbol;Acc:HGNC:27953]                                   | chr3  | + |
| [365] | AC015813.5  | ENSG00000279069.1  | -2.1538  | 5.24E-09  | novel transcript                                                                            | chr17 | + |
| [366] | SLC19A1     | ENSG00000173638.19 | -2.15257 | 4.11E-27  | solute carrier family 19 member 1 [Source:HGNC Symbol;Acc:HGNC:10937]                       | chr21 | - |
| [367] | KIAA1549L   | ENSG00000110427.16 | -2.14803 | 6.85E-102 | KIAA1549 like [Source:HGNC Symbol;Acc:HGNC:24836]                                           | chr11 | + |
| [368] | MIR1291     | ENSG00000281842.2  | -2.14481 | 0.004012  | microRNA 1291 [Source:HGNC Symbol;Acc:HGNC:35284]                                           | chr12 | - |
| [369] | CEP55       | ENSG00000138180.16 | -2.1446  | 2.28E-212 | centrosomal protein 55 [Source:HGNC Symbol;Acc:HGNC:1161]                                   | chr10 | + |



|       |           |                    |          |           |                                                                                               |       |   |
|-------|-----------|--------------------|----------|-----------|-----------------------------------------------------------------------------------------------|-------|---|
| [370] | HASPIN    | ENSG00000177602.5  | -2.14229 | 5.81E-31  | histone H3 associated protein kinase [Source:HGNC Symbol;Acc:HGNC:19682]                      | chr17 | + |
| [371] | GIN54     | ENSG00000147536.12 | -2.14011 | 3.01E-27  | GIN5 complex subunit 4 [Source:HGNC Symbol;Acc:HGNC:28226]                                    | chr8  | + |
| [372] | ZP1       | ENSG00000149506.11 | -2.13631 | 0.001225  | zona pellucida glycoprotein 1 [Source:HGNC Symbol;Acc:HGNC:13187]                             | chr11 | + |
| [373] | ACPP      | ENSG00000014257.16 | -2.13611 | 3.78E-06  | acid phosphatase 3 [Source:HGNC Symbol;Acc:HGNC:125]                                          | chr3  | + |
| [374] | APOBEC3B  | ENSG00000179750.16 | -2.13042 | 8.56E-28  | apolipoprotein B mRNA editing enzyme catalytic subunit 3B [Source:HGNC Symbol;Acc:HGNC:17352] | chr22 | + |
| [375] | TONSL     | ENSG00000160949.17 | -2.1261  | 3.11E-56  | tonsoku like, DNA repair protein [Source:HGNC Symbol;Acc:HGNC:7801]                           | chr8  | - |
| [376] | HIST1H2BK | ENSG00000197903.7  | -2.12532 | 5.90E-123 | H2B clustered histone 12 [Source:HGNC Symbol;Acc:HGNC:13954]                                  | chr6  | - |
| [377] | ERG       | ENSG00000157554.19 | -2.12255 | 0.001912  | ETS transcription factor ERG [Source:HGNC Symbol;Acc:HGNC:3446]                               | chr21 | - |
| [378] | RN7SKP90  | ENSG00000199883.1  | -2.11999 | 2.63E-07  | RN7SK pseudogene 90 [Source:HGNC Symbol;Acc:HGNC:45814]                                       | chr11 | + |
| [379] | CIT       | ENSG00000122966.16 | -2.1176  | 1.10E-221 | citron rho-interacting serine/threonine kinase [Source:HGNC Symbol;Acc:HGNC:1985]             | chr12 | - |
| [380] | RN7SL277P | ENSG00000240490.3  | -2.11672 | 0.000413  | RNA, 7SL, cytoplasmic 277, pseudogene [Source:HGNC Symbol;Acc:HGNC:46293]                     | chr1  | + |
| [381] | TICRR     | ENSG00000140534.14 | -2.11388 | 1.07E-46  | TOPBP1 interacting checkpoint and replication regulator [Source:HGNC Symbol;Acc:HGNC:28704]   | chr15 | + |
| [382] | EMP2      | ENSG00000213853.10 | -2.11262 | 2.04E-77  | epithelial membrane protein 2 [Source:HGNC Symbol;Acc:HGNC:3334]                              | chr16 | - |
| [383] | SKA1      | ENSG00000154839.10 | -2.11206 | 3.36E-27  | spindle and kinetochore associated complex subunit 1 [Source:HGNC Symbol;Acc:HGNC:28109]      | chr18 | + |

|       |            |                    |          |           |                                                                           |       |   |
|-------|------------|--------------------|----------|-----------|---------------------------------------------------------------------------|-------|---|
| [384] | RN7SL646P  | ENSG00000242341.3  | -2.11204 | 4.74E-07  | RNA, 7SL, cytoplasmic 646, pseudogene [Source:HGNC Symbol;Acc:HGNC:46662] | chr5  | + |
| [385] | CCDC178    | ENSG00000166960.16 | -2.11017 | 0.00559   | coiled-coil domain containing 178 [Source:HGNC Symbol;Acc:HGNC:29588]     | chr18 | - |
| [386] | CLDN2      | ENSG00000165376.10 | -2.10877 | 0.004234  | claudin 2 [Source:HGNC Symbol;Acc:HGNC:2041]                              | chrX  | + |
| [387] | RN7SL322P  | ENSG00000276588.1  | -2.10846 | 0.005638  | RNA, 7SL, cytoplasmic 322, pseudogene [Source:HGNC Symbol;Acc:HGNC:46338] | chr19 | + |
| [388] | LRRC45     | ENSG00000169683.8  | -2.10385 | 2.83E-33  | leucine rich repeat containing 45 [Source:HGNC Symbol;Acc:HGNC:28302]     | chr17 | + |
| [389] | AC006128.1 | ENSG00000279716.1  | -2.10381 | 0.000188  | TEC                                                                       | chr19 | + |
| [390] | PHF5CP     | ENSG00000267178.3  | -2.10015 | 0.001538  | PHD finger protein 5C pseudogene [Source:HGNC Symbol;Acc:HGNC:32385]      | chr19 | - |
| [391] | SLC31A2    | ENSG00000136867.11 | -2.09959 | 0.002054  | solute carrier family 31 member 2 [Source:HGNC Symbol;Acc:HGNC:11017]     | chr9  | + |
| [392] | RN7SL166P  | ENSG00000275014.1  | -2.09748 | 1.75E-14  | RNA, 7SL, cytoplasmic 166, pseudogene [Source:HGNC Symbol;Acc:HGNC:46182] | chr13 | - |
| [393] | SPAG5      | ENSG00000076382.17 | -2.09611 | 2.58E-225 | sperm associated antigen 5 [Source:HGNC Symbol;Acc:HGNC:13452]            | chr17 | - |
| [394] | RN7SL862P  | ENSG00000242651.3  | -2.0944  | 0.000133  | RNA, 7SL, cytoplasmic 862, pseudogene [Source:HGNC Symbol;Acc:HGNC:46878] | chr18 | - |
| [395] | RN7SKP185  | ENSG00000199683.1  | -2.09437 | 1.14E-05  | RN7SK pseudogene 185 [Source:HGNC Symbol;Acc:HGNC:45909]                  | chr20 | - |
| [396] | AC055840.1 | ENSG00000286890.1  | -2.09058 | 0.006152  | novel transcript, antisense to FHOD3                                      | chr18 | - |
| [397] | KIF18A     | ENSG00000121621.7  | -2.08847 | 1.94E-118 | kinesin family member 18A [Source:HGNC Symbol;Acc:HGNC:29441]             | chr11 | - |
| [398] | CDC45      | ENSG00000093009.10 | -2.0873  | 1.24E-53  | cell division cycle 45 [Source:HGNC Symbol;Acc:HGNC:1739]                 | chr22 | + |
| [399] | HIST2H3PS2 | ENSG00000273213.3  | -2.08157 | 0.000612  | H3.2 histone (putative) [Source:HGNC Symbol;Acc:HGNC:32060]               | chr1  | - |

|       |            |                        |          |               |                                                                                                   |       |   |
|-------|------------|------------------------|----------|---------------|---------------------------------------------------------------------------------------------------|-------|---|
| [400] | KDR        | ENSG00000128052.1<br>0 | -2.08051 | 3.00E-23      | kinase insert domain receptor<br>[Source:HGNC<br>Symbol;Acc:HGNC:6307]                            | chr4  | - |
| [401] | OLFML3     | ENSG00000116774.1<br>2 | -2.07997 | 1.78E-15      | olfactomedin like 3<br>[Source:HGNC<br>Symbol;Acc:HGNC:24956]                                     | chr1  | + |
| [402] | PRR7       | ENSG00000131188.1<br>2 | -2.07992 | 8.18E-05      | proline rich 7, synaptic<br>[Source:HGNC<br>Symbol;Acc:HGNC:28130]                                | chr5  | + |
| [403] | RN7SL521P  | ENSG00000240877.3      | -2.07862 | 1.24E-06      | RNA, 7SL, cytoplasmic 521,<br>pseudogene [Source:HGNC<br>Symbol;Acc:HGNC:46537]                   | chr7  | - |
| [404] | TBX2       | ENSG00000121068.1<br>4 | -2.07671 | 7.41E-58      | T-box transcription factor 2<br>[Source:HGNC<br>Symbol;Acc:HGNC:11597]                            | chr17 | + |
| [405] | RNU4-82P   | ENSG00000199313.1      | -2.0705  | 0.005228      | RNA, U4 small nuclear 82,<br>pseudogene [Source:HGNC<br>Symbol;Acc:HGNC:47018]                    | chr9  | - |
| [406] | RPS29P5    | ENSG00000230777.1      | -2.07006 | 0.000264      | ribosomal protein S29<br>pseudogene 5 [Source:HGNC<br>Symbol;Acc:HGNC:35584]                      | chr1  | + |
| [407] | BIRC5      | ENSG00000089685.1<br>5 | -2.06784 | 1.71E-<br>221 | baculoviral IAP repeat<br>containing 5 [Source:HGNC<br>Symbol;Acc:HGNC:593]                       | chr17 | + |
| [408] | LRRTM4     | ENSG00000176204.1<br>3 | -2.0637  | 0.000362      | leucine rich repeat<br>transmembrane neuronal 4<br>[Source:HGNC<br>Symbol;Acc:HGNC:19411]         | chr2  | - |
| [409] | KRT75      | ENSG00000170454.6      | -2.06189 | 4.35E-24      | keratin 75 [Source:HGNC<br>Symbol;Acc:HGNC:24431]                                                 | chr12 | - |
| [410] | AL138789.1 | ENSG00000233589.1      | -2.06016 | 0.003795      | novel transcript                                                                                  | chr1  | + |
| [411] | AC016596.3 | ENSG00000264281.3      | -2.05939 | 1.29E-13      | ribosomal protein L41 (RPL41)<br>pseudogene                                                       | chr5  | + |
| [412] | EME1       | ENSG00000154920.1<br>4 | -2.05894 | 1.12E-15      | essential meiotic structure-<br>specific endonuclease 1<br>[Source:HGNC<br>Symbol;Acc:HGNC:24965] | chr17 | + |
| [413] | RN7SL230P  | ENSG00000264916.2      | -2.05857 | 2.17E-07      | RNA, 7SL, cytoplasmic 230,<br>pseudogene [Source:HGNC<br>Symbol;Acc:HGNC:46246]                   | chr1  | + |
| [414] | KCNA7      | ENSG00000104848.1      | -2.05629 | 2.69E-07      | potassium voltage-gated channel<br>subfamily A member 7<br>[Source:HGNC<br>Symbol;Acc:HGNC:6226]  | chr19 | - |

|       |             |                    |          |           |                                                                                                       |       |   |
|-------|-------------|--------------------|----------|-----------|-------------------------------------------------------------------------------------------------------|-------|---|
| [415] | RN7SL714P   | ENSG00000241757.3  | -2.05343 | 5.26E-07  | RNA, 7SL, cytoplasmic 714, pseudogene [Source:HGNC Symbol;Acc:HGNC:46730]                             | chr14 | - |
| [416] | AUNIP       | ENSG00000127423.10 | -2.05253 | 6.69E-15  | aurora kinase A and ninein interacting protein [Source:HGNC Symbol;Acc:HGNC:28363]                    | chr1  | - |
| [417] | ESPL1       | ENSG00000135476.11 | -2.05048 | 1.26E-84  | extra spindle pole bodies like 1, separase [Source:HGNC Symbol;Acc:HGNC:16856]                        | chr12 | + |
| [418] | LYPLAL1-AS1 | ENSG00000228536.3  | -2.04829 | 7.27E-09  | LYPLAL1 antisense RNA 1 [Source:HGNC Symbol;Acc:HGNC:54054]                                           | chr1  | - |
| [419] | RPL41P5     | ENSG00000256393.1  | -2.04614 | 2.03E-13  | ribosomal protein L41 pseudogene 5 [Source:HGNC Symbol;Acc:HGNC:10355]                                | chr12 | - |
| [420] | LINC02813   | ENSG00000225334.3  | -2.04547 | 0.00757   | long intergenic non-protein coding RNA 2813 [Source:HGNC Symbol;Acc:HGNC:54345]                       | chr1  | + |
| [421] | RN7SL705P   | ENSG00000243549.3  | -2.04521 | 0.001584  | RNA, 7SL, cytoplasmic 705, pseudogene [Source:HGNC Symbol;Acc:HGNC:46721]                             | chr18 | - |
| [422] | AC005884.2  | ENSG00000267449.1  | -2.04216 | 2.70E-07  | novel transcript, antisense to BCAS3                                                                  | chr17 | - |
| [423] | ERCC6L      | ENSG00000186871.7  | -2.04194 | 7.96E-48  | ERCC excision repair 6 like, spindle assembly checkpoint helicase [Source:HGNC Symbol;Acc:HGNC:20794] | chrX  | - |
| [424] | AC125807.2  | ENSG00000250899.3  | -2.04123 | 1.95E-08  | novel transcript                                                                                      | chr12 | + |
| [425] | ZWINT       | ENSG00000122952.17 | -2.03962 | 6.68E-225 | ZW10 interacting kinetochore protein [Source:HGNC Symbol;Acc:HGNC:13195]                              | chr10 | - |
| [426] | MROH6       | ENSG00000204839.9  | -2.03791 | 0.002577  | maestro heat like repeat family member 6 [Source:HGNC Symbol;Acc:HGNC:27814]                          | chr8  | - |
| [427] | RN7SKP91    | ENSG00000222784.1  | -2.03784 | 0.006164  | RN7SK pseudogene 91 [Source:HGNC Symbol;Acc:HGNC:45815]                                               | chr1  | + |
| [428] | Metazoa_SRP | ENSG00000276213.1  | -2.03641 | 4.24E-07  | Metazoan signal recognition particle RNA [Source:RFAM;Acc:RF00017]                                    | chr7  | - |
| [429] | RN7SL803P   | ENSG00000272197.2  | -2.03634 | 3.34E-07  | RNA, 7SL, cytoplasmic 803, pseudogene [Source:HGNC Symbol;Acc:HGNC:46819]                             | chr5  | - |

|       |            |                        |          |          |                                                                                            |       |   |
|-------|------------|------------------------|----------|----------|--------------------------------------------------------------------------------------------|-------|---|
| [430] | HIST1H3E   | ENSG00000274750.2      | -2.03361 | 5.61E-25 | H3 clustered histone 6<br>[Source:HGNC<br>Symbol;Acc:HGNC:4769]                            | chr6  | + |
| [431] | RN7SL480P  | ENSG00000266187.2      | -2.03099 | 5.81E-12 | RNA, 7SL, cytoplasmic 480,<br>pseudogene [Source:HGNC<br>Symbol;Acc:HGNC:46496]            | chr1  | + |
| [432] | HAUS7      | ENSG00000213397.1<br>0 | -2.02974 | 0.000716 | HAUS augmin like complex<br>subunit 7 [Source:HGNC<br>Symbol;Acc:HGNC:32979]               | chrX  | - |
| [433] | RN7SL804P  | ENSG00000266185.2      | -2.02719 | 3.56E-05 | RNA, 7SL, cytoplasmic 804,<br>pseudogene [Source:HGNC<br>Symbol;Acc:HGNC:46820]            | chr12 | + |
| [434] | SNORD3A    | ENSG00000263934.4      | -2.02629 | 0        | small nucleolar RNA, C/D box<br>3A [Source:HGNC<br>Symbol;Acc:HGNC:33189]                  | chr17 | + |
| [435] | RN7SL30P   | ENSG00000243845.3      | -2.02603 | 0.000345 | RNA, 7SL, cytoplasmic 30,<br>pseudogene [Source:HGNC<br>Symbol;Acc:HGNC:46046]             | chr9  | - |
| [436] | AC018512.1 | ENSG00000262560.1      | -2.02552 | 0.008053 | novel protein                                                                              | chr15 | - |
| [437] | RN7SL664P  | ENSG00000265078.2      | -2.02513 | 8.28E-08 | RNA, 7SL, cytoplasmic 664,<br>pseudogene [Source:HGNC<br>Symbol;Acc:HGNC:46680]            | chr3  | - |
| [438] | ASF1B      | ENSG00000105011.9      | -2.02117 | 2.72E-14 | anti-silencing function 1B<br>histone chaperone<br>[Source:HGNC<br>Symbol;Acc:HGNC:20996]  | chr19 | - |
| [439] | RN7SL296P  | ENSG00000275090.1      | -2.01597 | 0.002958 | RNA, 7SL, cytoplasmic 296,<br>pseudogene [Source:HGNC<br>Symbol;Acc:HGNC:46312]            | chr3  | + |
| [440] | RN7SL320P  | ENSG00000243900.3      | -2.01525 | 0.000697 | RNA, 7SL, cytoplasmic 320,<br>pseudogene [Source:HGNC<br>Symbol;Acc:HGNC:46336]            | chr13 | + |
| [441] | SAPCD2     | ENSG00000186193.9      | -2.01492 | 3.83E-75 | suppressor APC domain<br>containing 2 [Source:HGNC<br>Symbol;Acc:HGNC:28055]               | chr9  | - |
| [442] | AC135178.4 | ENSG00000265749.6      | -2.01452 | 0.007066 | novel transcript, antisense to<br>KRBA2 and RPL26                                          | chr17 | + |
| [443] | RN7SL192P  | ENSG00000276757.1      | -2.01244 | 0.00458  | RNA, 7SL, cytoplasmic 192,<br>pseudogene [Source:HGNC<br>Symbol;Acc:HGNC:46208]            | chr19 | + |
| [444] | CSPG4P13   | ENSG00000260139.6      | -2.01039 | 6.11E-07 | chondroitin sulfate proteoglycan<br>4 pseudogene 13 [Source:HGNC<br>Symbol;Acc:HGNC:49195] | chr15 | + |

|       |           |                        |          |          |                                                                                 |       |   |
|-------|-----------|------------------------|----------|----------|---------------------------------------------------------------------------------|-------|---|
| [445] | BORA      | ENSG00000136122.1<br>7 | -2.00864 | 1.35E-36 | BORA aurora kinase A activator<br>[Source:HGNC<br>Symbol;Acc:HGNC:24724]        | chr13 | + |
| [446] | MAD1L1    | ENSG00000002822.1<br>5 | -2.00541 | 0.002955 | mitotic arrest deficient 1 like 1<br>[Source:HGNC<br>Symbol;Acc:HGNC:6762]      | chr7  | - |
| [447] | RN7SL523P | ENSG00000243976.2      | -2.00294 | 0.00334  | RNA, 7SL, cytoplasmic 523,<br>pseudogene [Source:HGNC<br>Symbol;Acc:HGNC:46539] | chr14 | - |
| [448] | NRGN      | ENSG00000154146.1<br>3 | -2.00071 | 8.21E-05 | neurogranin [Source:HGNC<br>Symbol;Acc:HGNC:8000]                               | chr11 | + |
