# Supplementary material for: In Vitro and In Vivo Enhancement of Temozolomide Effect in Human Glioblastoma by Non-Invasive Application of Cold Atmospheric Plasma
Source: MDPI journal article supplement (doi:10.3390/cancers13174485), 2021-09-06
Supplement: s1 [file s1]

**Supplementary Table 1: List of top 171 up-regulated genes in CAP treatment**

| Sr. No | Gene Name  | GeneID             | Log2(FC) | P-adj     | Description                                                                                   | Chromosome | Strand |
|--------|------------|--------------------|----------|-----------|-----------------------------------------------------------------------------------------------|------------|--------|
| [1]    | HSPA6      | ENSG00000173110.8  | 6.785705 | 3.75E-274 | heat shock protein family A (Hsp70) member 6<br>[Source:HGNC Symbol;Acc:HGNC:5239]            | chr1       | +      |
| [2]    | SMG1P2     | ENSG00000205534.6  | 6.438267 | 5.14E-64  | SMG1 pseudogene 2<br>[Source:HGNC Symbol;Acc:HGNC:49859]                                      | chr16      | -      |
| [3]    | HSPA7      | ENSG00000225217.1  | 5.865503 | 7.84E-101 | heat shock protein family A (Hsp70) member 7 (pseudogene) [Source:HGNC Symbol;Acc:HGNC:5240]  | chr1       | +      |
| [4]    | AL671762.1 | ENSG00000285565.1  | 5.843196 | 6.10E-49  | novel transcript                                                                              | chr6       | +      |
| [5]    | HSPA8P8    | ENSG00000229091.3  | 5.597482 | 6.87E-95  | heat shock protein family A (Hsp70) member 8 pseudogene 8 [Source:HGNC Symbol;Acc:HGNC:44923] | chr7       | +      |
| [6]    | RASD1      | ENSG00000108551.5  | 5.209623 | 1.06E-63  | ras related dexamethasone induced 1 [Source:HGNC Symbol;Acc:HGNC:15828]                       | chr17      | -      |
| [7]    | UBE2F-SCLY | ENSG00000258984.5  | 4.781227 | 2.26E-31  | UBE2F-SCLY readthrough (NMD candidate)<br>[Source:HGNC Symbol;Acc:HGNC:48339]                 | chr2       | +      |
| [8]    | SNAI1      | ENSG00000124216.4  | 4.486268 | 7.86E-57  | snail family transcriptional repressor 1 [Source:HGNC Symbol;Acc:HGNC:11128]                  | chr20      | +      |
| [9]    | ANKRD1     | ENSG00000148677.6  | 4.277808 | 2.10E-36  | ankyrin repeat domain 1<br>[Source:HGNC Symbol;Acc:HGNC:15819]                                | chr10      | -      |
| [10]   | XIRP1      | ENSG00000168334.9  | 4.002498 | 2.98E-18  | xin actin binding repeat containing 1 [Source:HGNC Symbol;Acc:HGNC:14301]                     | chr3       | -      |
| [11]   | TEX14      | ENSG00000121101.15 | 3.608406 | 3.21E-14  | testis expressed 14, intercellular bridge forming factor [Source:HGNC Symbol;Acc:HGNC:11737]  | chr17      | -      |
| [12]   | TCTE1      | ENSG00000146221.10 | 3.586367 | 3.78E-14  | t-complex-associated-testis-expressed 1 [Source:HGNC Symbol;Acc:HGNC:11693]                   | chr6       | -      |
| [13]   | FAM166A    | ENSG00000188163.8  | 3.54554  | 4.45E-30  | family with sequence similarity 166 member A<br>[Source:HGNC Symbol;Acc:HGNC:33818]           | chr9       | -      |

|      |        |                    |          |           |                                                                                                |       |   |
|------|--------|--------------------|----------|-----------|------------------------------------------------------------------------------------------------|-------|---|
| [14] | FRG2B  | ENSG00000225899.8  | 3.521867 | 3.69E-16  | FSHD region gene 2 family member B [Source:HGNC Symbol;Acc:HGNC:33518]                         | chr10 | - |
| [15] | PYGM   | ENSG00000068976.14 | 3.504451 | 2.13E-13  | glycogen phosphorylase, muscle associated [Source:HGNC Symbol;Acc:HGNC:9726]                   | chr11 | - |
| [16] | FOSB   | ENSG00000125740.14 | 3.471092 | 1.06E-163 | FosB proto-oncogene, AP-1 transcription factor subunit [Source:HGNC Symbol;Acc:HGNC:3797]      | chr19 | + |
| [17] | FOS    | ENSG00000170345.10 | 3.45061  | 3.67E-195 | Fos proto-oncogene, AP-1 transcription factor subunit [Source:HGNC Symbol;Acc:HGNC:3796]       | chr14 | + |
| [18] | GDF15  | ENSG00000130513.6  | 3.341701 | 0         | growth differentiation factor 15 [Source:HGNC Symbol;Acc:HGNC:30142]                           | chr19 | + |
| [19] | CHAC1  | ENSG00000128965.13 | 3.332273 | 1.64E-75  | ChaC glutathione specific gamma-glutamylcyclotransferase 1 [Source:HGNC Symbol;Acc:HGNC:28680] | chr15 | + |
| [20] | TRIB3  | ENSG00000101255.11 | 3.27466  | 2.86E-259 | tribbles pseudokinase 3 [Source:HGNC Symbol;Acc:HGNC:16228]                                    | chr20 | + |
| [21] | CDH16  | ENSG00000166589.13 | 3.259462 | 2.31E-11  | cadherin 16 [Source:HGNC Symbol;Acc:HGNC:1755]                                                 | chr16 | - |
| [22] | RGS16  | ENSG00000143333.7  | 3.257436 | 2.42E-15  | regulator of G protein signaling 16 [Source:HGNC Symbol;Acc:HGNC:9997]                         | chr1  | - |
| [23] | FNDC7  | ENSG00000143107.10 | 3.16889  | 8.49E-14  | fibronectin type III domain containing 7 [Source:HGNC Symbol;Acc:HGNC:26668]                   | chr1  | + |
| [24] | SEMA3G | ENSG00000010319.7  | 3.149107 | 1.40E-10  | semaphorin 3G [Source:HGNC Symbol;Acc:HGNC:30400]                                              | chr3  | - |
| [25] | KCNB1  | ENSG00000158445.10 | 3.123574 | 1.39E-14  | potassium voltage-gated channel subfamily B member 1 [Source:HGNC Symbol;Acc:HGNC:6231]        | chr20 | - |
| [26] | HRNR   | ENSG00000197915.6  | 3.114236 | 1.21E-208 | hornerin [Source:HGNC Symbol;Acc:HGNC:20846]                                                   | chr1  | - |
| [27] | AOC3   | ENSG00000131471.7  | 3.093482 | 1.10E-19  | amine oxidase copper containing 3 [Source:HGNC Symbol;Acc:HGNC:550]                            | chr17 | + |

|      |            |                    |          |           |                                                                                             |       |   |
|------|------------|--------------------|----------|-----------|---------------------------------------------------------------------------------------------|-------|---|
| [28] | BTG2       | ENSG00000159388.6  | 3.075122 | 1.59E-34  | BTG anti-proliferation factor 2<br>[Source:HGNC<br>Symbol;Acc:HGNC:1131]                    | chr1  | + |
| [29] | GADD45B    | ENSG00000099860.9  | 3.004451 | 0         | growth arrest and DNA<br>damage inducible beta<br>[Source:HGNC<br>Symbol;Acc:HGNC:4096]     | chr19 | + |
| [30] | ULBP1      | ENSG00000111981.5  | 2.996039 | 2.62E-111 | UL16 binding protein 1<br>[Source:HGNC<br>Symbol;Acc:HGNC:14893]                            | chr6  | + |
| [31] | CRYAB      | ENSG00000109846.9  | 2.991635 | 7.17E-12  | crystallin alpha B<br>[Source:HGNC<br>Symbol;Acc:HGNC:2389]                                 | chr11 | - |
| [32] | TRIM54     | ENSG00000138100.13 | 2.972804 | 3.03E-12  | tripartite motif containing 54<br>[Source:HGNC<br>Symbol;Acc:HGNC:16008]                    | chr2  | + |
| [33] | LINC01647  | ENSG00000235643.2  | 2.890033 | 8.34E-09  | long intergenic non-protein<br>coding RNA 1647<br>[Source:HGNC<br>Symbol;Acc:HGNC:52434]    | chr1  | + |
| [34] | ADM2       | ENSG00000128165.9  | 2.861327 | 3.33E-11  | adrenomedullin 2<br>[Source:HGNC<br>Symbol;Acc:HGNC:28898]                                  | chr22 | + |
| [35] | SLC7A11    | ENSG00000151012.13 | 2.846124 | 0         | solute carrier family 7 member<br>11 [Source:HGNC<br>Symbol;Acc:HGNC:11059]                 | chr4  | - |
| [36] | CYP4F11    | ENSG00000171903.16 | 2.844703 | 1.78E-09  | cytochrome P450 family 4<br>subfamily F member 11<br>[Source:HGNC<br>Symbol;Acc:HGNC:13265] | chr19 | - |
| [37] | WDR49      | ENSG00000174776.11 | 2.835377 | 1.65E-08  | WD repeat domain 49<br>[Source:HGNC<br>Symbol;Acc:HGNC:26587]                               | chr3  | - |
| [38] | CD79A      | ENSG00000105369.9  | 2.79531  | 3.01E-08  | CD79a molecule<br>[Source:HGNC<br>Symbol;Acc:HGNC:1698]                                     | chr19 | + |
| [39] | MORN3      | ENSG00000139714.12 | 2.768175 | 4.12E-08  | MORN repeat containing 3<br>[Source:HGNC<br>Symbol;Acc:HGNC:29807]                          | chr12 | - |
| [40] | ZCCHC12    | ENSG00000174460.4  | 2.761703 | 4.51E-08  | zinc finger CCHC-type<br>containing 12 [Source:HGNC<br>Symbol;Acc:HGNC:27273]               | chrX  | + |
| [41] | AC116317.1 | ENSG00000286176.2  | 2.757175 | 5.97E-08  | novel transcript                                                                            | chr4  | - |
| [42] | PCDH10     | ENSG00000138650.9  | 2.74145  | 9.23E-48  | protocadherin 10<br>[Source:HGNC<br>Symbol;Acc:HGNC:13404]                                  | chr4  | + |

|      |                  |                    |          |           |                                                                                           |       |   |
|------|------------------|--------------------|----------|-----------|-------------------------------------------------------------------------------------------|-------|---|
| [43] | VLDLR-AS1        | ENSG00000236404.10 | 2.739858 | 1.38E-08  | VLDLR antisense RNA 1<br>[Source:HGNC<br>Symbol;Acc:HGNC:49621]                           | chr9  | - |
| [44] | NR4A2            | ENSG00000153234.14 | 2.726517 | 2.68E-22  | nuclear receptor subfamily 4<br>group A member 2<br>[Source:HGNC<br>Symbol;Acc:HGNC:7981] | chr2  | - |
| [45] | C1orf116         | ENSG00000182795.13 | 2.725826 | 1.71E-08  | chromosome 1 open reading<br>frame 116 [Source:HGNC<br>Symbol;Acc:HGNC:28667]             | chr1  | - |
| [46] | AC004988.1       | ENSG00000203446.2  | 2.721426 | 4.96E-33  | SUGCT antisense RNA 1<br>[Source:HGNC<br>Symbol;Acc:HGNC:40745]                           | chr7  | - |
| [47] | ATF3             | ENSG00000162772.17 | 2.709543 | 4.34E-176 | activating transcription factor<br>3 [Source:HGNC<br>Symbol;Acc:HGNC:785]                 | chr1  | + |
| [48] | MYO16            | ENSG00000041515.16 | 2.703252 | 1.82E-08  | myosin XVI [Source:HGNC<br>Symbol;Acc:HGNC:29822]                                         | chr13 | + |
| [49] | AOC2             | ENSG00000131480.9  | 2.701219 | 3.83E-24  | amine oxidase copper<br>containing 2 [Source:HGNC<br>Symbol;Acc:HGNC:549]                 | chr17 | + |
| [50] | CDC42BPG         | ENSG00000171219.9  | 2.689907 | 4.92E-08  | CDC42 binding protein kinase<br>gamma [Source:HGNC<br>Symbol;Acc:HGNC:29829]              | chr11 | - |
| [51] | SESN2            | ENSG00000130766.5  | 2.684871 | 6.12E-287 | sestrin 2 [Source:HGNC<br>Symbol;Acc:HGNC:20746]                                          | chr1  | + |
| [52] | RND1             | ENSG00000172602.11 | 2.676245 | 6.16E-11  | Rho family GTPase 1<br>[Source:HGNC<br>Symbol;Acc:HGNC:18314]                             | chr12 | - |
| [53] | RNF103-<br>CHMP3 | ENSG00000249884.8  | 2.673563 | 2.32E-09  | RNF103-CHMP3 readthrough<br>[Source:HGNC<br>Symbol;Acc:HGNC:38847]                        | chr2  | - |
| [54] | TRIM69           | ENSG00000185880.13 | 2.660738 | 1.67E-07  | tripartite motif containing 69<br>[Source:HGNC<br>Symbol;Acc:HGNC:17857]                  | chr15 | + |
| [55] | CTH              | ENSG00000116761.12 | 2.637362 | 2.48E-74  | cystathionine gamma-lyase<br>[Source:HGNC<br>Symbol;Acc:HGNC:2501]                        | chr1  | + |
| [56] | KLHL30-AS1       | ENSG00000279484.1  | 2.636637 | 9.60E-12  | KLHL30 antisense RNA 1<br>[Source:HGNC<br>Symbol;Acc:HGNC:31018]                          | chr2  | - |
| [57] | IGFL2-AS1        | ENSG00000268621.6  | 2.632185 | 5.17E-10  | IGFL2 antisense RNA 1<br>[Source:HGNC<br>Symbol;Acc:HGNC:52559]                           | chr19 | - |
| [58] | FAM71E2          | ENSG00000180043.11 | 2.595935 | 1.90E-07  | family with sequence<br>similarity 71 member E2<br>[Source:HGNC<br>Symbol;Acc:HGNC:25278] | chr19 | - |

|      |            |                    |          |           |                                                                                                                    |       |   |
|------|------------|--------------------|----------|-----------|--------------------------------------------------------------------------------------------------------------------|-------|---|
| [59] | MRC1       | ENSG00000260314.3  | 2.595682 | 4.76E-08  | mannose receptor C-type 1<br>[Source:HGNC<br>Symbol;Acc:HGNC:7228]                                                 | chr10 | + |
| [60] | MYO15B     | ENSG00000266714.9  | 2.578392 | 2.13E-08  | myosin XVB [Source:HGNC<br>Symbol;Acc:HGNC:14083]                                                                  | chr17 | + |
| [61] | RGS2       | ENSG00000116741.8  | 2.558029 | 1.26E-53  | regulator of G protein<br>signaling 2 [Source:HGNC<br>Symbol;Acc:HGNC:9998]                                        | chr1  | + |
| [62] | MMP25      | ENSG00000008516.17 | 2.549562 | 3.26E-07  | matrix metalloproteinase 25<br>[Source:HGNC<br>Symbol;Acc:HGNC:14246]                                              | chr16 | + |
| [63] | TRIM72     | ENSG00000177238.14 | 2.544406 | 1.84E-07  | tripartite motif containing 72<br>[Source:HGNC<br>Symbol;Acc:HGNC:32671]                                           | chr16 | + |
| [64] | SERPINB10  | ENSG00000242550.6  | 2.530519 | 3.91E-07  | serpin family B member 10<br>[Source:HGNC<br>Symbol;Acc:HGNC:8942]                                                 | chr18 | + |
| [65] | AC005532.1 | ENSG00000230825.2  | 2.512786 | 9.59E-07  | novel transcript                                                                                                   | chr7  | + |
| [66] | DDIT4      | ENSG00000168209.5  | 2.510242 | 0         | DNA damage inducible<br>transcript 4 [Source:HGNC<br>Symbol;Acc:HGNC:24944]                                        | chr10 | + |
| [67] | AC009336.2 | ENSG00000279160.1  | 2.5036   | 3.33E-07  | TEC                                                                                                                | chr2  | - |
| [68] | FUT1       | ENSG00000174951.11 | 2.488023 | 9.59E-07  | fucosyltransferase 1 (H blood<br>group) [Source:HGNC<br>Symbol;Acc:HGNC:4012]                                      | chr19 | - |
| [69] | LSMEM1     | ENSG00000181016.9  | 2.478281 | 8.38E-10  | leucine rich single-pass<br>membrane protein 1<br>[Source:HGNC<br>Symbol;Acc:HGNC:22036]                           | chr7  | + |
| [70] | FP236383.1 | ENSG00000274868.1  | 2.441704 | 1.14E-06  | nan                                                                                                                | chr21 | + |
| [71] | FP671120.1 | ENSG00000275664.1  | 2.441704 | 1.14E-06  | nan                                                                                                                | chr21 | + |
| [72] | FP671120.3 | ENSG00000277671.1  | 2.441704 | 1.14E-06  | nan                                                                                                                | chr21 | + |
| [73] | FP236383.2 | ENSG00000278775.1  | 2.441704 | 1.14E-06  | nan                                                                                                                | chr21 | + |
| [74] | AC068506.1 | ENSG00000278464.2  | 2.43209  | 1.31E-06  | novel transcript                                                                                                   | chr18 | - |
| [75] | PKD1L1     | ENSG00000158683.8  | 2.427537 | 2.59E-06  | polycystin 1 like 1, transient<br>receptor potential channel<br>interacting [Source:HGNC<br>Symbol;Acc:HGNC:18053] | chr7  | - |
| [76] | TRIM55     | ENSG00000147573.17 | 2.405025 | 3.27E-06  | tripartite motif containing 55<br>[Source:HGNC<br>Symbol;Acc:HGNC:14215]                                           | chr8  | + |
| [77] | ARC        | ENSG00000198576.4  | 2.396054 | 1.46E-233 | activity regulated<br>cytoskeleton associated<br>protein [Source:HGNC<br>Symbol;Acc:HGNC:648]                      | chr8  | - |

|      |           |                    |          |          |                                                                                 |       |   |
|------|-----------|--------------------|----------|----------|---------------------------------------------------------------------------------|-------|---|
| [78] | RADIL     | ENSG00000157927.17 | 2.391756 | 6.36E-08 | Rap associating with DIL domain [Source:HGNC Symbol;Acc:HGNC:22226]             | chr7  | - |
| [79] | ARHGAP9   | ENSG00000123329.19 | 2.391134 | 3.69E-06 | Rho GTPase activating protein 9 [Source:HGNC Symbol;Acc:HGNC:14130]             | chr12 | - |
| [80] | TMPRSS11F | ENSG00000198092.6  | 2.385111 | 1.12E-07 | transmembrane serine protease 11F [Source:HGNC Symbol;Acc:HGNC:29994]           | chr4  | - |
| [81] | TENT5C    | ENSG00000183508.5  | 2.383051 | 8.70E-27 | terminal nucleotidyltransferase 5C [Source:HGNC Symbol;Acc:HGNC:24712]          | chr1  | + |
| [82] | CMYA5     | ENSG00000164309.15 | 2.377949 | 4.25E-18 | cardiomyopathy associated 5 [Source:HGNC Symbol;Acc:HGNC:14305]                 | chr5  | + |
| [83] | BMF       | ENSG00000104081.14 | 2.371261 | 6.41E-24 | Bcl2 modifying factor [Source:HGNC Symbol;Acc:HGNC:24132]                       | chr15 | - |
| [84] | UNC13D    | ENSG00000092929.11 | 2.363321 | 6.47E-07 | unc-13 homoLog D [Source:HGNC Symbol;Acc:HGNC:23147]                            | chr17 | - |
| [85] | PIWIL2    | ENSG00000197181.12 | 2.34879  | 3.74E-06 | piwi like RNA-mediated gene silencing 2 [Source:HGNC Symbol;Acc:HGNC:17644]     | chr8  | + |
| [86] | IL17REL   | ENSG00000188263.10 | 2.345556 | 5.96E-06 | interleukin 17 receptor E like [Source:HGNC Symbol;Acc:HGNC:33808]              | chr22 | - |
| [87] | TBR1      | ENSG00000136535.15 | 2.341482 | 6.21E-06 | T-box brain transcription factor 1 [Source:HGNC Symbol;Acc:HGNC:11590]          | chr2  | + |
| [88] | MUC17     | ENSG00000169876.14 | 2.337255 | 6.46E-06 | mucin 17, cell surface associated [Source:HGNC Symbol;Acc:HGNC:16800]           | chr7  | + |
| [89] | CSPG5     | ENSG00000114646.10 | 2.336411 | 6.51E-06 | chondroitin sulfate proteoglycan 5 [Source:HGNC Symbol;Acc:HGNC:2467]           | chr3  | - |
| [90] | KLHL30    | ENSG00000168427.9  | 2.336367 | 1.23E-06 | kelch like family member 30 [Source:HGNC Symbol;Acc:HGNC:24770]                 | chr2  | + |
| [91] | TTC24     | ENSG00000187862.12 | 2.33036  | 6.94E-06 | tetratricopeptide repeat domain 24 [Source:HGNC Symbol;Acc:HGNC:32348]          | chr1  | + |
| [92] | LINC02009 | ENSG00000283646.2  | 2.319849 | 7.61E-08 | long intergenic non-protein coding RNA 2009 [Source:HGNC Symbol;Acc:HGNC:52845] | chr3  | - |

|       |            |                    |          |           |                                                                                      |       |   |
|-------|------------|--------------------|----------|-----------|--------------------------------------------------------------------------------------|-------|---|
| [93]  | NMRAL2P    | ENSG00000171658.8  | 2.318376 | 4.20E-09  | NmrA like redox sensor 2, pseudogene [Source:HGNC Symbol;Acc:HGNC:52332]             | chr3  | + |
| [94]  | RGMA       | ENSG00000182175.14 | 2.316319 | 1.98E-06  | repulsive guidance molecule BMP co-receptor a [Source:HGNC Symbol;Acc:HGNC:30308]    | chr15 | - |
| [95]  | PLK2       | ENSG00000145632.15 | 2.301251 | 0         | polo like kinase 2 [Source:HGNC Symbol;Acc:HGNC:19699]                               | chr5  | - |
| [96]  | TINCR      | ENSG00000223573.7  | 2.298154 | 8.43E-06  | TINCR ubiquitin domain containing [Source:HGNC Symbol;Acc:HGNC:14607]                | chr19 | - |
| [97]  | CCDC62     | ENSG00000130783.14 | 2.293842 | 2.36E-07  | coiled-coil domain containing 62 [Source:HGNC Symbol;Acc:HGNC:30723]                 | chr12 | + |
| [98]  | AC010336.1 | ENSG00000214248.2  | 2.286967 | 1.07E-05  | novel transcript, antisense to LRRC8E                                                | chr19 | - |
| [99]  | SPINK1     | ENSG00000164266.10 | 2.268021 | 1.86E-24  | serine peptidase inhibitor Kazal type 1 [Source:HGNC Symbol;Acc:HGNC:11244]          | chr5  | - |
| [100] | AC108517.2 | ENSG00000286097.1  | 2.26795  | 3.80E-06  | novel transcript                                                                     | chr4  | - |
| [101] | OVGP1      | ENSG00000085465.13 | 2.262879 | 2.46E-06  | oviductal glycoprotein 1 [Source:HGNC Symbol;Acc:HGNC:8524]                          | chr1  | - |
| [102] | CREBRF     | ENSG00000164463.12 | 2.262448 | 7.96E-114 | CREB3 regulatory factor [Source:HGNC Symbol;Acc:HGNC:24050]                          | chr5  | + |
| [103] | FLG-AS1    | ENSG00000237975.7  | 2.257098 | 6.58E-11  | FLG antisense RNA 1 [Source:HGNC Symbol;Acc:HGNC:27913]                              | chr1  | + |
| [104] | MSC        | ENSG00000178860.8  | 2.25523  | 1.68E-112 | musculin [Source:HGNC Symbol;Acc:HGNC:7321]                                          | chr8  | - |
| [105] | GADD45A    | ENSG00000116717.13 | 2.253486 | 2.60E-271 | growth arrest and DNA damage inducible alpha [Source:HGNC Symbol;Acc:HGNC:4095]      | chr1  | + |
| [106] | SLIT2      | ENSG00000145147.20 | 2.245738 | 3.99E-27  | slit guidance ligand 2 [Source:HGNC Symbol;Acc:HGNC:11086]                           | chr4  | + |
| [107] | PMAIP1     | ENSG00000141682.11 | 2.245264 | 1.16E-198 | phorbol-12-myristate-13-acetate-induced protein 1 [Source:HGNC Symbol;Acc:HGNC:9108] | chr18 | + |
| [108] | INHBE      | ENSG00000139269.3  | 2.244313 | 1.72E-08  | inhibin subunit beta E [Source:HGNC Symbol;Acc:HGNC:24029]                           | chr12 | + |

|       |                 |                    |          |           |                                                                                                            |       |   |
|-------|-----------------|--------------------|----------|-----------|------------------------------------------------------------------------------------------------------------|-------|---|
| [109] | VWF             | ENSG00000110799.13 | 2.237611 | 3.17E-06  | von Willebrand factor<br>[Source:HGNC<br>Symbol;Acc:HGNC:12726]                                            | chr12 | - |
| [110] | STX17-AS1       | ENSG00000255145.3  | 2.235405 | 1.77E-05  | STX17 antisense RNA 1<br>[Source:HGNC<br>Symbol;Acc:HGNC:51174]                                            | chr9  | - |
| [111] | ADGRG3          | ENSG00000182885.17 | 2.228503 | 1.45E-05  | adhesion G protein-coupled<br>receptor G3 [Source:HGNC<br>Symbol;Acc:HGNC:13728]                           | chr16 | + |
| [112] | COL20A1         | ENSG00000101203.16 | 2.226244 | 1.45E-05  | collagen type XX alpha 1 chain<br>[Source:HGNC<br>Symbol;Acc:HGNC:14670]                                   | chr20 | + |
| [113] | HSPA1A          | ENSG00000204389.10 | 2.212583 | 4.32E-68  | heat shock protein family A<br>(Hsp70) member 1A<br>[Source:HGNC<br>Symbol;Acc:HGNC:5232]                  | chr6  | + |
| [114] | SLC7A11-<br>AS1 | ENSG00000250033.5  | 2.209068 | 6.75E-09  | SLC7A11 antisense RNA 1<br>[Source:HGNC<br>Symbol;Acc:HGNC:44064]                                          | chr4  | + |
| [115] | C5AR1           | ENSG00000197405.8  | 2.198236 | 1.34E-20  | complement C5a receptor 1<br>[Source:HGNC<br>Symbol;Acc:HGNC:1338]                                         | chr19 | + |
| [116] | LRRC66          | ENSG00000188993.3  | 2.192187 | 2.67E-05  | leucine rich repeat containing<br>66 [Source:HGNC<br>Symbol;Acc:HGNC:34299]                                | chr4  | - |
| [117] | PTGER3          | ENSG00000050628.20 | 2.189278 | 1.33E-06  | prostaglandin E receptor 3<br>[Source:HGNC<br>Symbol;Acc:HGNC:9595]                                        | chr1  | - |
| [118] | ATP1B2          | ENSG00000129244.9  | 2.182853 | 8.26E-06  | ATPase Na <sup>+</sup> /K <sup>+</sup> transporting<br>subunit beta 2 [Source:HGNC<br>Symbol;Acc:HGNC:805] | chr17 | + |
| [119] | GPD1            | ENSG00000167588.13 | 2.176708 | 3.06E-05  | glycerol-3-phosphate<br>dehydrogenase 1<br>[Source:HGNC<br>Symbol;Acc:HGNC:4455]                           | chr12 | + |
| [120] | AL355916.2      | ENSG00000258926.2  | 2.176231 | 3.08E-05  | novel transcript, antisense to<br>PRKCH                                                                    | chr14 | - |
| [121] | AC087521.1      | ENSG00000244953.1  | 2.171182 | 3.24E-05  | novel transcript                                                                                           | chr11 | - |
| [122] | AC105046.1      | ENSG00000261026.1  | 2.164324 | 3.44E-05  | novel transcript, overlapping<br>to EGR3                                                                   | chr8  | - |
| [123] | AC017104.2      | ENSG00000230047.1  | 2.157895 | 3.50E-05  | HIGD2A pseudogene 1<br>[Source:HGNC<br>Symbol;Acc:HGNC:54793]                                              | chr2  | - |
| [124] | TP53INP1        | ENSG00000164938.14 | 2.15744  | 9.20E-260 | tumor protein p53 inducible<br>nuclear protein 1<br>[Source:HGNC<br>Symbol;Acc:HGNC:18022]                 | chr8  | - |



|       |            |                    |          |           |                                                                                              |       |   |
|-------|------------|--------------------|----------|-----------|----------------------------------------------------------------------------------------------|-------|---|
| [125] | CRISPLD2   | ENSG00000103196.12 | 2.153065 | 1.79E-10  | cysteine rich secretory protein LCCL domain containing 2 [Source:HGNC Symbol;Acc:HGNC:25248] | chr16 | + |
| [126] | DDIT3      | ENSG00000175197.12 | 2.150635 | 4.64E-242 | DNA damage inducible transcript 3 [Source:HGNC Symbol;Acc:HGNC:2726]                         | chr12 | - |
| [127] | KLF4       | ENSG00000136826.15 | 2.145219 | 4.15E-41  | Kruppel like factor 4 [Source:HGNC Symbol;Acc:HGNC:6348]                                     | chr9  | - |
| [128] | AC099329.2 | ENSG00000273328.5  | 2.138803 | 3.65E-05  | novel transcript                                                                             | chr3  | + |
| [129] | KLHL24     | ENSG00000114796.16 | 2.138262 | 1.31E-131 | kelch like family member 24 [Source:HGNC Symbol;Acc:HGNC:25947]                              | chr3  | + |
| [130] | TMEM184A   | ENSG00000164855.16 | 2.132881 | 1.77E-05  | transmembrane protein 184A [Source:HGNC Symbol;Acc:HGNC:28797]                               | chr7  | - |
| [131] | FRAS1      | ENSG00000138759.19 | 2.132744 | 2.26E-11  | Fraser extracellular matrix complex subunit 1 [Source:HGNC Symbol;Acc:HGNC:19185]            | chr4  | + |
| [132] | KLF5       | ENSG00000102554.14 | 2.130805 | 2.31E-104 | Kruppel like factor 5 [Source:HGNC Symbol;Acc:HGNC:6349]                                     | chr13 | + |
| [133] | PART1      | ENSG00000152931.8  | 2.128041 | 2.24E-09  | prostate androgen-regulated transcript 1 [Source:HGNC Symbol;Acc:HGNC:17263]                 | chr5  | + |
| [134] | ATF4P4     | ENSG00000256167.1  | 2.127367 | 8.88E-28  | activating transcription factor 4 pseudogene 4 [Source:HGNC Symbol;Acc:HGNC:787]             | chr11 | + |
| [135] | AC131160.1 | ENSG00000283765.1  | 2.1264   | 4.91E-06  | novel protein                                                                                | chr3  | - |
| [136] | KLHDC7B    | ENSG00000130487.9  | 2.124529 | 4.33E-06  | kelch domain containing 7B [Source:HGNC Symbol;Acc:HGNC:25145]                               | chr22 | + |
| [137] | DCAF4L1    | ENSG00000182308.7  | 2.117241 | 6.64E-09  | DDB1 and CUL4 associated factor 4 like 1 [Source:HGNC Symbol;Acc:HGNC:27723]                 | chr4  | + |
| [138] | IQCN       | ENSG00000130518.17 | 2.115791 | 9.95E-30  | IQ motif containing N [Source:HGNC Symbol;Acc:HGNC:29350]                                    | chr19 | - |
| [139] | AKNA       | ENSG00000106948.16 | 2.109713 | 7.66E-29  | AT-hook transcription factor [Source:HGNC Symbol;Acc:HGNC:24108]                             | chr9  | - |
| [140] | SLC6A9     | ENSG00000196517.11 | 2.107995 | 4.20E-29  | solute carrier family 6 member 9 [Source:HGNC Symbol;Acc:HGNC:11056]                         | chr1  | - |

|       |            |                    |          |           |                                                                                                     |       |   |
|-------|------------|--------------------|----------|-----------|-----------------------------------------------------------------------------------------------------|-------|---|
| [141] | OBSCN      | ENSG00000154358.21 | 2.107337 | 4.25E-05  | obscurin, cytoskeletal calmodulin and titin-interacting RhoGEF [Source:HGNC Symbol;Acc:HGNC:15719]  | chr1  | + |
| [142] | PTPRB      | ENSG00000127329.15 | 2.100913 | 2.36E-15  | protein tyrosine phosphatase receptor type B [Source:HGNC Symbol;Acc:HGNC:9665]                     | chr12 | - |
| [143] | SPOCK2     | ENSG00000107742.13 | 2.09873  | 6.21E-05  | SPARC (osteonectin), cwcw and kazal like domains proteoglycan 2 [Source:HGNC Symbol;Acc:HGNC:13564] | chr10 | - |
| [144] | GADD45G    | ENSG00000130222.11 | 2.096315 | 6.34E-05  | growth arrest and DNA damage inducible gamma [Source:HGNC Symbol;Acc:HGNC:4097]                     | chr9  | + |
| [145] | N4BP3      | ENSG00000145911.6  | 2.096066 | 6.36E-05  | NEDD4 binding protein 3 [Source:HGNC Symbol;Acc:HGNC:29852]                                         | chr5  | + |
| [146] | ASXL3      | ENSG00000141431.12 | 2.093583 | 5.16E-06  | ASXL transcriptional regulator 3 [Source:HGNC Symbol;Acc:HGNC:29357]                                | chr18 | + |
| [147] | ATP6V1FNB  | ENSG00000272899.4  | 2.093466 | 4.73E-25  | ATP6V1F neighbor [Source:HGNC Symbol;Acc:HGNC:52392]                                                | chr7  | + |
| [148] | AC068946.3 | ENSG00000287529.1  | 2.093451 | 6.47E-05  | novel transcript, antisense to ZFAND2B                                                              | chr2  | - |
| [149] | PRR9       | ENSG00000203783.5  | 2.088022 | 1.96E-11  | proline rich 9 [Source:HGNC Symbol;Acc:HGNC:32057]                                                  | chr1  | + |
| [150] | FLG        | ENSG00000143631.10 | 2.086563 | 1.84E-26  | filaggrin [Source:HGNC Symbol;Acc:HGNC:3748]                                                        | chr1  | - |
| [151] | NR4A3      | ENSG00000119508.18 | 2.086386 | 1.49E-16  | nuclear receptor subfamily 4 group A member 3 [Source:HGNC Symbol;Acc:HGNC:7982]                    | chr9  | + |
| [152] | ATF4P3     | ENSG00000228218.1  | 2.081002 | 5.53E-106 | activating transcription factor 4 pseudogene 3 [Source:HGNC Symbol;Acc:HGNC:788]                    | chr17 | - |
| [153] | AQP3       | ENSG00000165272.16 | 2.074731 | 5.84E-05  | aquaporin 3 (Gill blood group) [Source:HGNC Symbol;Acc:HGNC:636]                                    | chr9  | - |
| [154] | RTL5       | ENSG00000242732.4  | 2.068024 | 2.46E-08  | retrotransposon Gag like 5 [Source:HGNC Symbol;Acc:HGNC:29430]                                      | chrX  | - |

|       |            |                    |          |           |                                                                                                                   |       |   |
|-------|------------|--------------------|----------|-----------|-------------------------------------------------------------------------------------------------------------------|-------|---|
| [155] | AC007728.2 | ENSG00000261644.2  | 2.06681  | 1.46E-08  | CYLD antisense RNA 1<br>[Source:HGNC<br>Symbol;Acc:HGNC:55352]                                                    | chr16 | - |
| [156] | SCIN       | ENSG00000006747.15 | 2.059584 | 8.68E-05  | scinderin [Source:HGNC<br>Symbol;Acc:HGNC:21695]                                                                  | chr7  | + |
| [157] | AC091230.1 | ENSG00000261606.5  | 2.057144 | 8.85E-05  | novel transcript                                                                                                  | chr15 | + |
| [158] | AKR1C1     | ENSG00000187134.14 | 2.05459  | 0         | aldo-keto reductase family 1<br>member C1 [Source:HGNC<br>Symbol;Acc:HGNC:384]                                    | chr10 | + |
| [159] | NATD1      | ENSG00000274180.1  | 2.049595 | 5.97E-14  | N-acetyltransferase domain<br>containing 1 [Source:HGNC<br>Symbol;Acc:HGNC:30770]                                 | chr17 | - |
| [160] | AC087632.2 | ENSG00000259316.11 | 2.046574 | 7.62E-05  | novel protein                                                                                                     | chr15 | - |
| [161] | ATCAY      | ENSG00000167654.18 | 2.037408 | 0.000104  | ATCAY kinesin light chain<br>interacting caytaxin<br>[Source:HGNC<br>Symbol;Acc:HGNC:779]                         | chr19 | + |
| [162] | DPPA2P4    | ENSG00000261429.2  | 2.034474 | 6.19E-05  | developmental pluripotency<br>associated 2 pseudogene 4<br>[Source:HGNC<br>Symbol;Acc:HGNC:44629]                 | chr16 | + |
| [163] | AC244453.2 | ENSG00000233029.3  | 2.033394 | 0.000103  | novel transcript                                                                                                  | chr1  | - |
| [164] | AL022326.1 | ENSG00000224794.2  | 2.029977 | 0.000111  | novel transcript                                                                                                  | chr22 | + |
| [165] | RRAD       | ENSG00000166592.12 | 2.029252 | 8.11E-255 | RRAD, Ras related glycolysis<br>inhibitor and calcium channel<br>regulator [Source:HGNC<br>Symbol;Acc:HGNC:10446] | chr16 | - |
| [166] | GABARAPL1  | ENSG00000139112.11 | 2.028935 | 1.13E-128 | GABA type A receptor<br>associated protein like 1<br>[Source:HGNC<br>Symbol;Acc:HGNC:4068]                        | chr12 | + |
| [167] | PPP1R15A   | ENSG00000087074.8  | 2.023321 | 0         | protein phosphatase 1<br>regulatory subunit 15A<br>[Source:HGNC<br>Symbol;Acc:HGNC:14375]                         | chr19 | + |
| [168] | EGLN3      | ENSG00000129521.14 | 2.021904 | 1.10E-05  | egl-9 family hypoxia inducible<br>factor 3 [Source:HGNC<br>Symbol;Acc:HGNC:14661]                                 | chr14 | - |
| [169] | B3GNT4     | ENSG00000176383.9  | 2.015336 | 6.47E-07  | UDP-GlcNAc:betaGal beta-<br>1,3-N-<br>acetylglucosaminyltransferase<br>4 [Source:HGNC<br>Symbol;Acc:HGNC:15683]   | chr12 | + |
| [170] | PNRC1      | ENSG00000146278.11 | 2.011547 | 1.63E-94  | proline rich nuclear receptor<br>coactivator 1 [Source:HGNC<br>Symbol;Acc:HGNC:17278]                             | chr6  | + |
| [171] | LINC00536  | ENSG00000249917.3  | 2.003938 | 0.000113  | long intergenic non-protein<br>coding RNA 536                                                                     | chr8  | - |

|  |  |  |  |  |                                        |  |  |
|--|--|--|--|--|----------------------------------------|--|--|
|  |  |  |  |  | [Source:HGNC<br>Symbol;Acc:HGNC:43645] |  |  |
|--|--|--|--|--|----------------------------------------|--|--|
