# Supplementary material for: In Vitro and In Vivo Enhancement of Temozolomide Effect in Human Glioblastoma by Non-Invasive Application of Cold Atmospheric Plasma
Source: MDPI journal article supplement (doi:10.3390/cancers13174485), 2021-09-06
Supplement: s1 [file s1]

**Supplementary Table 5: List of top 462 up-regulated genes in the case of CAP + TMZ treatment**

| Sr. No | Gene Name  | GeneID             | Log2(FC) | P-adj     | Description                                                                                   | Chromosome | Strand |
|--------|------------|--------------------|----------|-----------|-----------------------------------------------------------------------------------------------|------------|--------|
| [1]    | RASD1      | ENSG00000108551.5  | 7.083646 | 2.39E-100 | ras related dexamethasone induced 1 [Source:HGNC Symbol;Acc:HGNC:15828]                       | chr17      | -      |
| [2]    | HSPA6      | ENSG00000173110.8  | 6.609536 | 3.37E-222 | heat shock protein family A (Hsp70) member 6 [Source:HGNC Symbol;Acc:HGNC:5239]               | chr1       | +      |
| [3]    | FRG2       | ENSG00000205097.6  | 6.483626 | 2.57E-33  | FSHD region gene 2 [Source:HGNC Symbol;Acc:HGNC:19136]                                        | chr4       | -      |
| [4]    | FRG2B      | ENSG00000225899.8  | 6.153196 | 9.42E-43  | FSHD region gene 2 family member B [Source:HGNC Symbol;Acc:HGNC:33518]                        | chr10      | -      |
| [5]    | SNAI1      | ENSG00000124216.4  | 6.06363  | 8.96E-104 | snail family transcriptional repressor 1 [Source:HGNC Symbol;Acc:HGNC:11128]                  | chr20      | +      |
| [6]    | IGFL2-AS1  | ENSG00000268621.6  | 5.91067  | 1.55E-63  | IGFL2 antisense RNA 1 [Source:HGNC Symbol;Acc:HGNC:52559]                                     | chr19      | -      |
| [7]    | HSPA7      | ENSG00000225217.1  | 5.88534  | 5.45E-76  | heat shock protein family A (Hsp70) member 7 (pseudogene) [Source:HGNC Symbol;Acc:HGNC:5240]  | chr1       | +      |
| [8]    | HSPA8P8    | ENSG00000229091.3  | 5.717379 | 5.35E-78  | heat shock protein family A (Hsp70) member 8 pseudogene 8 [Source:HGNC Symbol;Acc:HGNC:44923] | chr7       | +      |
| [9]    | AC116317.1 | ENSG00000286176.2  | 5.418042 | 2.18E-20  | novel transcript                                                                              | chr4       | -      |
| [10]   | KRT16      | ENSG00000186832.9  | 5.280486 | 2.29E-21  | keratin 16 [Source:HGNC Symbol;Acc:HGNC:6423]                                                 | chr17      | -      |
| [11]   | CYP4F11    | ENSG00000171903.16 | 5.258774 | 5.25E-28  | cytochrome P450 family 4 subfamily F member 11 [Source:HGNC Symbol;Acc:HGNC:13265]            | chr19      | -      |
| [12]   | RGS16      | ENSG00000143333.7  | 5.25644  | 1.01E-39  | regulator of G protein signaling 16 [Source:HGNC Symbol;Acc:HGNC:9997]                        | chr1       | -      |
| [13]   | CDH16      | ENSG00000166589.13 | 5.164967 | 3.82E-18  | cadherin 16 [Source:HGNC Symbol;Acc:HGNC:1755]                                                | chr16      | -      |
| [14]   | ITGAM      | ENSG00000169896.18 | 5.101083 | 1.30E-17  | integrin subunit alpha M [Source:HGNC Symbol;Acc:HGNC:6149]                                   | chr16      | +      |
| [15]   | LINC01647  | ENSG00000235643.2  | 5.088052 | 1.71E-17  | long intergenic non-protein coding RNA 1647 [Source:HGNC Symbol;Acc:HGNC:52434]               | chr1       | +      |
| [16]   | UCA1       | ENSG00000214049.8  | 5.053508 | 3.54E-17  | urothelial cancer associated 1 [Source:HGNC Symbol;Acc:HGNC:37126]                            | chr19      | +      |
| [17]   | TEX14      | ENSG00000121101.15 | 5.0246   | 5.75E-17  | testis expressed 14, intercellular bridge forming                                             | chr17      | -      |

|      |            |                    |          |           |                                                                                                         |       |   |
|------|------------|--------------------|----------|-----------|---------------------------------------------------------------------------------------------------------|-------|---|
|      |            |                    |          |           | factor [Source:HGNC<br>Symbol;Acc:HGNC:11737]                                                           |       |   |
| [18] | FAM166A    | ENSG00000188163.8  | 4.947647 | 4.86E-60  | family with sequence<br>similarity 166 member A<br>[Source:HGNC<br>Symbol;Acc:HGNC:33818]               | chr9  | - |
| [19] | VLDLR-AS1  | ENSG00000236404.10 | 4.689785 | 5.42E-21  | VLDLR antisense RNA 1<br>[Source:HGNC<br>Symbol;Acc:HGNC:49621]                                         | chr9  | - |
| [20] | KCNB1      | ENSG00000158445.10 | 4.664124 | 1.84E-30  | potassium voltage-gated<br>channel subfamily B member<br>1 [Source:HGNC<br>Symbol;Acc:HGNC:6231]        | chr20 | - |
| [21] | SPINK1     | ENSG00000164266.10 | 4.64754  | 9.86E-169 | serine peptidase inhibitor<br>Kazal type 1 [Source:HGNC<br>Symbol;Acc:HGNC:11244]                       | chr5  | - |
| [22] | UBE2F-SCLY | ENSG00000258984.5  | 4.597201 | 1.36E-14  | UBE2F-SCLY readthrough<br>(NMD candidate)<br>[Source:HGNC<br>Symbol;Acc:HGNC:48339]                     | chr2  | + |
| [23] | FOS        | ENSG00000170345.10 | 4.544896 | 0         | Fos proto-oncogene, AP-1<br>transcription factor subunit<br>[Source:HGNC<br>Symbol;Acc:HGNC:3796]       | chr14 | + |
| [24] | AC010307.3 | ENSG00000249478.1  | 4.5212   | 5.42E-21  | novel transcript                                                                                        | chr5  | + |
| [25] | SEMA3G     | ENSG00000010319.7  | 4.48375  | 1.18E-12  | semaphorin 3G<br>[Source:HGNC<br>Symbol;Acc:HGNC:30400]                                                 | chr3  | - |
| [26] | FRG2C      | ENSG00000172969.7  | 4.397368 | 7.33E-15  | FSHD region gene 2 family<br>member C [Source:HGNC<br>Symbol;Acc:HGNC:33626]                            | chr3  | + |
| [27] | CHAC1      | ENSG00000128965.13 | 4.391572 | 9.71E-153 | ChaC glutathione specific<br>gamma-glutamylcyclotransferase 1<br>[Source:HGNC<br>Symbol;Acc:HGNC:28680] | chr15 | + |
| [28] | TRIM69     | ENSG00000185880.13 | 4.360619 | 4.09E-11  | tripartite motif containing 69<br>[Source:HGNC<br>Symbol;Acc:HGNC:17857]                                | chr15 | + |
| [29] | GADD45G    | ENSG00000130222.11 | 4.350572 | 9.94E-12  | growth arrest and DNA<br>damage inducible gamma<br>[Source:HGNC<br>Symbol;Acc:HGNC:4097]                | chr9  | + |
| [30] | ATP1B2     | ENSG00000129244.9  | 4.330974 | 7.74E-23  | ATPase Na+/K+ transporting<br>subunit beta 2 [Source:HGNC<br>Symbol;Acc:HGNC:805]                       | chr17 | + |
| [31] | TRIM72     | ENSG00000177238.14 | 4.295404 | 3.23E-16  | tripartite motif containing 72<br>[Source:HGNC<br>Symbol;Acc:HGNC:32671]                                | chr16 | + |
| [32] | RPL12P42   | ENSG00000213253.5  | 4.288776 | 1.78E-11  | ribosomal protein L12<br>pseudogene 42<br>[Source:HGNC<br>Symbol;Acc:HGNC:36165]                        | chr19 | - |
| [33] | ZCCHC12    | ENSG00000174460.4  | 4.275539 | 2.24E-11  | zinc finger CCHC-type<br>containing 12 [Source:HGNC<br>Symbol;Acc:HGNC:27273]                           | chrX  | + |
| [34] | AC068946.3 | ENSG00000287529.1  | 4.252821 | 3.31E-11  | novel transcript, antisense to<br>ZFAND2B                                                               | chr2  | - |

|      |                |                    |          |           |                                                                                                           |       |   |
|------|----------------|--------------------|----------|-----------|-----------------------------------------------------------------------------------------------------------|-------|---|
| [35] | TMEM256-PLSCR3 | ENSG00000262481.5  | 4.24652  | 3.58E-23  | TMEM256-PLSCR3 readthrough (NMD candidate) [Source:HGNC Symbol;Acc:HGNC:49186]                            | chr17 | - |
| [36] | IGSF9          | ENSG00000085552.17 | 4.245213 | 3.28E-11  | immunoglobulin superfamily member 9 [Source:HGNC Symbol;Acc:HGNC:18132]                                   | chr1  | - |
| [37] | LINC02158      | ENSG00000225611.1  | 4.226267 | 4.93E-11  | long intergenic non-protein coding RNA 2158 [Source:HGNC Symbol;Acc:HGNC:53019]                           | chr3  | + |
| [38] | IGF2           | ENSG00000167244.21 | 4.15105  | 1.29E-10  | insulin like growth factor 2 [Source:HGNC Symbol;Acc:HGNC:5466]                                           | chr11 | - |
| [39] | SUN3           | ENSG00000164744.13 | 4.140504 | 2.24E-10  | Sad1 and UNC84 domain containing 3 [Source:HGNC Symbol;Acc:HGNC:22429]                                    | chr7  | - |
| [40] | RND1           | ENSG00000172602.11 | 4.130541 | 7.32E-25  | Rho family GTPase 1 [Source:HGNC Symbol;Acc:HGNC:18314]                                                   | chr12 | - |
| [41] | USH1G          | ENSG00000182040.9  | 4.095689 | 2.93E-10  | USH1 protein network component sans [Source:HGNC Symbol;Acc:HGNC:16356]                                   | chr17 | - |
| [42] | GDF15          | ENSG00000130513.6  | 3.996778 | 0         | growth differentiation factor 15 [Source:HGNC Symbol;Acc:HGNC:30142]                                      | chr19 | + |
| [43] | FOSB           | ENSG00000125740.14 | 3.98363  | 1.33E-224 | FosB proto-oncogene, AP-1 transcription factor subunit [Source:HGNC Symbol;Acc:HGNC:3797]                 | chr19 | + |
| [44] | FUT1           | ENSG00000174951.11 | 3.978679 | 1.66E-10  | fucosyltransferase 1 (H blood group) [Source:HGNC Symbol;Acc:HGNC:4012]                                   | chr19 | - |
| [45] | SPRR2D         | ENSG00000163216.7  | 3.973165 | 3.66E-34  | small proline rich protein 2D [Source:HGNC Symbol;Acc:HGNC:11264]                                         | chr1  | - |
| [46] | AC005532.1     | ENSG00000230825.2  | 3.94482  | 1.93E-09  | novel transcript                                                                                          | chr7  | + |
| [47] | AC087521.1     | ENSG00000244953.1  | 3.943737 | 1.98E-09  | novel transcript                                                                                          | chr11 | - |
| [48] | GNG7           | ENSG00000176533.13 | 3.935902 | 2.21E-09  | G protein subunit gamma 7 [Source:HGNC Symbol;Acc:HGNC:4410]                                              | chr19 | - |
| [49] | AL356804.1     | ENSG00000259033.2  | 3.932982 | 2.30E-09  | novel transcript                                                                                          | chr14 | + |
| [50] | AL354872.2     | ENSG00000271992.1  | 3.909684 | 4.13E-10  | novel transcript                                                                                          | chr1  | + |
| [51] | DRAIC          | ENSG00000245750.9  | 3.902544 | 3.81E-09  | downregulated RNA in cancer, inhibitor of cell invasion and migration [Source:HGNC Symbol;Acc:HGNC:27082] | chr15 | + |
| [52] | ZDHHC11B       | ENSG00000206077.11 | 3.890776 | 8.37E-11  | zinc finger DHHC-type containing 11B [Source:HGNC Symbol;Acc:HGNC:32962]                                  | chr5  | - |
| [53] | XIRP1          | ENSG00000168334.9  | 3.847332 | 6.79E-09  | xin actin binding repeat containing 1 [Source:HGNC Symbol;Acc:HGNC:14301]                                 | chr3  | - |

|      |                |                    |          |           |                                                                                          |       |   |
|------|----------------|--------------------|----------|-----------|------------------------------------------------------------------------------------------|-------|---|
| [54] | COL26A1        | ENSG00000160963.14 | 3.822978 | 9.52E-09  | collagen type XXVI alpha 1 chain [Source:HGNC Symbol;Acc:HGNC:18038]                     | chr7  | + |
| [55] | TRIB3          | ENSG00000101255.11 | 3.807516 | 0         | tribbles pseudokinase 3 [Source:HGNC Symbol;Acc:HGNC:16228]                              | chr20 | + |
| [56] | FAM71A         | ENSG00000162771.8  | 3.801103 | 1.78E-09  | family with sequence similarity 71 member A [Source:HGNC Symbol;Acc:HGNC:26541]          | chr1  | + |
| [57] | GADD45B        | ENSG00000099860.9  | 3.786702 | 0         | growth arrest and DNA damage inducible beta [Source:HGNC Symbol;Acc:HGNC:4096]           | chr19 | + |
| [58] | AL031590.1     | ENSG00000284633.1  | 3.782483 | 1.46E-08  | novel transcript, antisense to PDGFB                                                     | chr22 | + |
| [59] | SPANXN5        | ENSG00000204363.5  | 3.772884 | 1.84E-08  | SPANX family member N5 [Source:HGNC Symbol;Acc:HGNC:33178]                               | chrX  | - |
| [60] | AC008060.1     | ENSG00000218672.1  | 3.76491  | 1.93E-08  | novel transcript                                                                         | chr7  | + |
| [61] | DPEP2          | ENSG00000167261.14 | 3.727886 | 2.62E-08  | dipeptidase 2 [Source:HGNC Symbol;Acc:HGNC:23028]                                        | chr16 | - |
| [62] | FAM71E2        | ENSG00000180043.11 | 3.7062   | 1.25E-09  | family with sequence similarity 71 member E2 [Source:HGNC Symbol;Acc:HGNC:25278]         | chr19 | - |
| [63] | CTH            | ENSG00000116761.12 | 3.689789 | 1.00E-171 | cystathionine gamma-lyase [Source:HGNC Symbol;Acc:HGNC:2501]                             | chr1  | + |
| [64] | RGMA           | ENSG00000182175.14 | 3.687721 | 4.27E-12  | repulsive guidance molecule BMP co-receptor a [Source:HGNC Symbol;Acc:HGNC:30308]        | chr15 | - |
| [65] | ULBP1          | ENSG00000111981.5  | 3.685598 | 1.44E-193 | UL16 binding protein 1 [Source:HGNC Symbol;Acc:HGNC:14893]                               | chr6  | + |
| [66] | DPPA2P4        | ENSG00000261429.2  | 3.670316 | 2.68E-11  | developmental pluripotency associated 2 pseudogene 4 [Source:HGNC Symbol;Acc:HGNC:44629] | chr16 | + |
| [67] | AC087203.2     | ENSG00000255556.2  | 3.658845 | 2.32E-09  | ubiquitin specific peptidase 17-like 2 (USP17L2) pseudogene                              | chr8  | - |
| [68] | CRYAB          | ENSG00000109846.9  | 3.643301 | 3.94E-12  | crystallin alpha B [Source:HGNC Symbol;Acc:HGNC:2389]                                    | chr11 | - |
| [69] | CALCB          | ENSG00000175868.14 | 3.630166 | 4.07E-09  | calcitonin related polypeptide beta [Source:HGNC Symbol;Acc:HGNC:1438]                   | chr11 | + |
| [70] | EEF1AKMT4-ECE2 | ENSG00000284917.1  | 3.564778 | 1.55E-07  | EEF1AKMT4-ECE2 readthrough [Source:HGNC Symbol;Acc:HGNC:53615]                           | chr3  | + |
| [71] | AC004835.1     | ENSG00000230392.1  | 3.562897 | 7.86E-09  | novel transcript                                                                         | chrX  | + |
| [72] | ANKRD1         | ENSG00000148677.6  | 3.55128  | 7.28E-15  | ankyrin repeat domain 1 [Source:HGNC Symbol;Acc:HGNC:15819]                              | chr10 | - |

|      |            |                    |          |          |                                                                                                                 |       |   |
|------|------------|--------------------|----------|----------|-----------------------------------------------------------------------------------------------------------------|-------|---|
| [73] | UNC5B      | ENSG00000107731.12 | 3.541083 | 0        | unc-5 netrin receptor B<br>[Source:HGNC<br>Symbol;Acc:HGNC:12568]                                               | chr10 | + |
| [74] | MT1JP      | ENSG00000255986.6  | 3.527006 | 2.28E-07 | metallothionein 1J,<br>pseudogene [Source:HGNC<br>Symbol;Acc:HGNC:7402]                                         | chr16 | + |
| [75] | TTYH2      | ENSG00000141540.11 | 3.521148 | 2.44E-07 | tweety family member 2<br>[Source:HGNC<br>Symbol;Acc:HGNC:13877]                                                | chr17 | + |
| [76] | TCTE1      | ENSG00000146221.10 | 3.507395 | 2.85E-07 | t-complex-associated-testis-<br>expressed 1 [Source:HGNC<br>Symbol;Acc:HGNC:11693]                              | chr6  | - |
| [77] | SLC7A11    | ENSG00000151012.13 | 3.500562 | 0        | solute carrier family 7 member<br>11 [Source:HGNC<br>Symbol;Acc:HGNC:11059]                                     | chr4  | - |
| [78] | AC009336.2 | ENSG00000279160.1  | 3.488563 | 6.58E-09 | TEC                                                                                                             | chr2  | - |
| [79] | USP17L7    | ENSG00000226430.6  | 3.488239 | 7.54E-10 | ubiquitin specific peptidase 17<br>like family member 7<br>[Source:HGNC<br>Symbol;Acc:HGNC:37180]               | chr8  | - |
| [80] | DDIT4      | ENSG00000168209.5  | 3.48771  | 0        | DNA damage inducible<br>transcript 4 [Source:HGNC<br>Symbol;Acc:HGNC:24944]                                     | chr10 | + |
| [81] | PPP1R36    | ENSG00000165807.8  | 3.470223 | 2.15E-09 | protein phosphatase 1<br>regulatory subunit 36<br>[Source:HGNC<br>Symbol;Acc:HGNC:20097]                        | chr14 | + |
| [82] | AC244453.2 | ENSG00000233029.3  | 3.446736 | 3.85E-08 | novel transcript                                                                                                | chr1  | - |
| [83] | PCDH10     | ENSG00000138650.9  | 3.445621 | 7.96E-93 | protocadherin 10<br>[Source:HGNC<br>Symbol;Acc:HGNC:13404]                                                      | chr4  | + |
| [84] | ADM2       | ENSG00000128165.9  | 3.425809 | 8.70E-12 | adrenomedullin 2<br>[Source:HGNC<br>Symbol;Acc:HGNC:28898]                                                      | chr22 | + |
| [85] | NR4A2      | ENSG00000153234.14 | 3.425524 | 1.91E-32 | nuclear receptor subfamily 4<br>group A member 2<br>[Source:HGNC<br>Symbol;Acc:HGNC:7981]                       | chr2  | - |
| [86] | KLHL30-AS1 | ENSG00000279484.1  | 3.424713 | 1.58E-18 | KLHL30 antisense RNA 1<br>[Source:HGNC<br>Symbol;Acc:HGNC:31018]                                                | chr2  | - |
| [87] | AL136985.3 | ENSG00000283445.1  | 3.421542 | 2.29E-08 | novel transcript                                                                                                | chr1  | + |
| [88] | OBSCN      | ENSG00000154358.21 | 3.421144 | 9.05E-09 | obscurin, cytoskeletal<br>calmodulin and titin-<br>interacting RhoGEF<br>[Source:HGNC<br>Symbol;Acc:HGNC:15719] | chr1  | + |
| [89] | IL17REL    | ENSG00000188263.10 | 3.412165 | 7.76E-07 | interleukin 17 receptor E like<br>[Source:HGNC<br>Symbol;Acc:HGNC:33808]                                        | chr22 | - |
| [90] | IL2RB      | ENSG00000100385.14 | 3.399989 | 6.03E-08 | interleukin 2 receptor subunit<br>beta [Source:HGNC<br>Symbol;Acc:HGNC:6009]                                    | chr22 | - |
| [91] | AC243772.2 | ENSG00000233030.2  | 3.391776 | 8.54E-09 | novel transcript, antisense to<br>FCGR1A                                                                        | chr1  | - |

|       |            |                    |          |           |                                                                                                 |       |   |
|-------|------------|--------------------|----------|-----------|-------------------------------------------------------------------------------------------------|-------|---|
| [92]  | STPG3      | ENSG00000197768.10 | 3.374602 | 4.91E-10  | sperm-tail PG-rich repeat containing 3 [Source:HGNC Symbol;Acc:HGNC:37285]                      | chr9  | + |
| [93]  | FCGR1A     | ENSG00000150337.13 | 3.37236  | 1.07E-06  | Fc fragment of IgG receptor Ia [Source:HGNC Symbol;Acc:HGNC:3613]                               | chr1  | + |
| [94]  | FGF18      | ENSG00000156427.8  | 3.338434 | 4.43E-14  | fibroblast growth factor 18 [Source:HGNC Symbol;Acc:HGNC:3674]                                  | chr5  | + |
| [95]  | DNAH2      | ENSG00000183914.14 | 3.334464 | 2.77E-13  | dynein axonemal heavy chain 2 [Source:HGNC Symbol;Acc:HGNC:2948]                                | chr17 | + |
| [96]  | MYO15B     | ENSG00000266714.9  | 3.3279   | 7.14E-11  | myosin XVB [Source:HGNC Symbol;Acc:HGNC:14083]                                                  | chr17 | + |
| [97]  | LSMEM1     | ENSG00000181016.9  | 3.315882 | 1.11E-16  | leucine rich single-pass membrane protein 1 [Source:HGNC Symbol;Acc:HGNC:22036]                 | chr7  | + |
| [98]  | ANKFN1     | ENSG00000153930.12 | 3.314569 | 1.03E-12  | ankyrin repeat and fibronectin type III domain containing 1 [Source:HGNC Symbol;Acc:HGNC:26766] | chr17 | + |
| [99]  | LINC01978  | ENSG00000262188.2  | 3.30738  | 2.16E-06  | long intergenic non-protein coding RNA 1978 [Source:HGNC Symbol;Acc:HGNC:52806]                 | chr17 | + |
| [100] | RGS2       | ENSG00000116741.8  | 3.296927 | 3.14E-109 | regulator of G protein signaling 2 [Source:HGNC Symbol;Acc:HGNC:9998]                           | chr1  | + |
| [101] | LINC01705  | ENSG00000232679.2  | 3.296305 | 9.66E-19  | long intergenic non-protein coding RNA 1705 [Source:HGNC Symbol;Acc:HGNC:52493]                 | chr1  | - |
| [102] | ADAP2      | ENSG00000184060.11 | 3.291895 | 2.22E-06  | ArfGAP with dual PH domains 2 [Source:HGNC Symbol;Acc:HGNC:16487]                               | chr17 | + |
| [103] | BAHCC1     | ENSG00000266074.8  | 3.280479 | 6.74E-08  | BAH domain and coiled-coil containing 1 [Source:HGNC Symbol;Acc:HGNC:29279]                     | chr17 | + |
| [104] | AC087203.1 | ENSG00000254423.1  | 3.272256 | 2.57E-07  | ubiquitin specific peptidase 17-like 2 ( USP17L2) pseudogene                                    | chr8  | - |
| [105] | TINCR      | ENSG00000223573.7  | 3.255755 | 1.06E-06  | TINCR ubiquitin domain containing [Source:HGNC Symbol;Acc:HGNC:14607]                           | chr19 | - |
| [106] | ATCAY      | ENSG00000167654.18 | 3.230318 | 4.04E-06  | ATCAY kinesin light chain interacting caytaxin [Source:HGNC Symbol;Acc:HGNC:779]                | chr19 | + |
| [107] | PCDH1      | ENSG00000156453.13 | 3.213897 | 6.94E-07  | protocadherin 1 [Source:HGNC Symbol;Acc:HGNC:8655]                                              | chr5  | - |
| [108] | VN2R3P     | ENSG00000234680.1  | 3.201704 | 5.08E-06  | vomer nasal 2 receptor 3, pseudogene [Source:HGNC Symbol;Acc:HGNC:33209]                        | chr9  | + |
| [109] | TATDN2P3   | ENSG00000235205.1  | 3.1742   | 1.09E-06  | TatD DNase domain containing 2 pseudogene 3                                                     | chr13 | + |

|       |            |                    |          |          |                                                                                                      |       |   |
|-------|------------|--------------------|----------|----------|------------------------------------------------------------------------------------------------------|-------|---|
|       |            |                    |          |          | [Source:HGNC<br>Symbol;Acc:HGNC:39256]                                                               |       |   |
| [110] | MOV10L1    | ENSG00000073146.16 | 3.17417  | 1.50E-06 | Mov10 like RISC complex<br>RNA helicase 1<br>[Source:HGNC<br>Symbol;Acc:HGNC:7201]                   | chr22 | + |
| [111] | CD79A      | ENSG00000105369.9  | 3.17112  | 6.49E-06 | CD79a molecule<br>[Source:HGNC<br>Symbol;Acc:HGNC:1698]                                              | chr19 | + |
| [112] | DNAH3      | ENSG00000158486.13 | 3.162367 | 3.05E-07 | dynein axonemal heavy chain<br>3 [Source:HGNC<br>Symbol;Acc:HGNC:2949]                               | chr16 | - |
| [113] | DACH1      | ENSG00000276644.5  | 3.159199 | 4.17E-20 | dachshund family<br>transcription factor 1<br>[Source:HGNC<br>Symbol;Acc:HGNC:2663]                  | chr13 | - |
| [114] | RPLP0P2    | ENSG00000243742.5  | 3.143877 | 8.29E-81 | ribosomal protein lateral stalk<br>subunit P0 pseudogene 2<br>[Source:HGNC<br>Symbol;Acc:HGNC:17960] | chr11 | + |
| [115] | AL022326.1 | ENSG00000224794.2  | 3.13394  | 9.93E-06 | novel transcript                                                                                     | chr22 | + |
| [116] | SLIT2      | ENSG00000145147.20 | 3.128024 | 4.00E-64 | slit guidance ligand 2<br>[Source:HGNC<br>Symbol;Acc:HGNC:11086]                                     | chr4  | + |
| [117] | VTCN1      | ENSG00000134258.17 | 3.120048 | 1.03E-05 | V-set domain containing T cell<br>activation inhibitor 1<br>[Source:HGNC<br>Symbol;Acc:HGNC:28873]   | chr1  | - |
| [118] | RSAD2      | ENSG00000134321.12 | 3.106324 | 1.16E-05 | radical S-adenosyl methionine<br>domain containing 2<br>[Source:HGNC<br>Symbol;Acc:HGNC:30908]       | chr2  | + |
| [119] | HIPK4      | ENSG00000160396.9  | 3.105017 | 1.08E-06 | homeodomain interacting<br>protein kinase 4<br>[Source:HGNC<br>Symbol;Acc:HGNC:19007]                | chr19 | - |
| [120] | LINC01977  | ENSG00000262772.2  | 3.094091 | 1.33E-05 | long intergenic non-protein<br>coding RNA 1977<br>[Source:HGNC<br>Symbol;Acc:HGNC:52804]             | chr17 | + |
| [121] | ARC        | ENSG00000198576.4  | 3.091599 | 0        | activity regulated<br>cytoskeleton associated<br>protein [Source:HGNC<br>Symbol;Acc:HGNC:648]        | chr8  | - |
| [122] | AC104825.1 | ENSG00000251615.3  | 3.089389 | 2.11E-08 | novel transcript                                                                                     | chr4  | - |
| [123] | ZPLD1      | ENSG00000170044.8  | 3.077843 | 1.48E-05 | zona pellucida like domain<br>containing 1 [Source:HGNC<br>Symbol;Acc:HGNC:27022]                    | chr3  | + |
| [124] | AC011462.1 | ENSG00000255730.5  | 3.070303 | 1.84E-05 | novel protein                                                                                        | chr19 | + |
| [125] | N4BP3      | ENSG00000145911.6  | 3.048438 | 1.84E-05 | NEDD4 binding protein 3<br>[Source:HGNC<br>Symbol;Acc:HGNC:29852]                                    | chr5  | + |
| [126] | AC007317.1 | ENSG00000285898.1  | 3.046239 | 1.94E-05 | Novel transcript                                                                                     | chr2  | + |
| [127] | STPG3-AS1  | ENSG00000275549.1  | 3.045982 | 6.88E-13 | STPG3 antisense RNA 1<br>[Source:HGNC<br>Symbol;Acc:HGNC:51176]                                      | chr9  | - |

|       |                   |                    |          |           |                                                                                              |       |   |
|-------|-------------------|--------------------|----------|-----------|----------------------------------------------------------------------------------------------|-------|---|
| [128] | SLC7A11-AS1       | ENSG00000250033.5  | 3.044937 | 1.05E-13  | SLC7A11 antisense RNA 1<br>[Source:HGNC<br>Symbol;Acc:HGNC:44064]                            | chr4  | + |
| [129] | FLG-AS1           | ENSG00000237975.7  | 3.041116 | 3.39E-21  | FLG antisense RNA 1<br>[Source:HGNC<br>Symbol;Acc:HGNC:27913]                                | chr1  | + |
| [130] | PEAK3             | ENSG00000188305.6  | 3.040021 | 6.28E-10  | PEAK family member 3<br>[Source:HGNC<br>Symbol;Acc:HGNC:24793]                               | chr19 | - |
| [131] | AC010378.2        | ENSG00000286403.1  | 3.023012 | 4.91E-06  | novel transcript                                                                             | chr5  | + |
| [132] | HAVCR2            | ENSG00000135077.9  | 3.021262 | 2.24E-05  | hepatitis A virus cellular<br>receptor 2 [Source:HGNC<br>Symbol;Acc:HGNC:18437]              | chr5  | - |
| [133] | LINC01979         | ENSG00000262585.1  | 3.021262 | 2.24E-05  | long intergenic non-protein<br>coding RNA 1979<br>[Source:HGNC<br>Symbol;Acc:HGNC:52807]     | chr17 | - |
| [134] | AC105046.1        | ENSG00000261026.1  | 3.015918 | 2.41E-05  | novel transcript, overlapping<br>to EGR3                                                     | chr8  | - |
| [135] | FMOD              | ENSG00000122176.12 | 3.00828  | 2.49E-05  | fibromodulin [Source:HGNC<br>Symbol;Acc:HGNC:3774]                                           | chr1  | - |
| [136] | KLF4              | ENSG00000136826.15 | 3.007449 | 3.10E-93  | Kruppel like factor 4<br>[Source:HGNC<br>Symbol;Acc:HGNC:6348]                               | chr9  | - |
| [137] | KRTAP21-2         | ENSG00000187026.3  | 3.006379 | 2.53E-05  | keratin associated protein 21-2<br>[Source:HGNC<br>Symbol;Acc:HGNC:18946]                    | chr21 | - |
| [138] | CSPG5             | ENSG00000114646.10 | 3.005571 | 2.55E-05  | chondroitin sulfate<br>proteoglycan 5<br>[Source:HGNC<br>Symbol;Acc:HGNC:2467]               | chr3  | - |
| [139] | GULP1             | ENSG00000144366.16 | 3.002643 | 1.80E-257 | GULP PTB domain containing<br>engulfment adaptor 1<br>[Source:HGNC<br>Symbol;Acc:HGNC:18649] | chr2  | + |
| [140] | FP236383.1        | ENSG00000274868.1  | 2.995039 | 4.59E-06  | nan                                                                                          | chr21 | + |
| [141] | FP671120.1        | ENSG00000275664.1  | 2.995039 | 4.59E-06  | nan                                                                                          | chr21 | + |
| [142] | FP671120.3        | ENSG00000277671.1  | 2.995039 | 4.59E-06  | nan                                                                                          | chr21 | + |
| [143] | FP236383.2        | ENSG00000278775.1  | 2.995039 | 4.59E-06  | nan                                                                                          | chr21 | + |
| [144] | CLDN1             | ENSG00000163347.6  | 2.990274 | 2.87E-06  | claudin 1 [Source:HGNC<br>Symbol;Acc:HGNC:2032]                                              | chr3  | - |
| [145] | LINC00881         | ENSG00000241135.6  | 2.988584 | 2.88E-06  | long intergenic non-protein<br>coding RNA 881<br>[Source:HGNC<br>Symbol;Acc:HGNC:48567]      | chr3  | + |
| [146] | TENT5C            | ENSG00000183508.5  | 2.971829 | 9.44E-47  | terminal<br>nucleotidyltransferase 5C<br>[Source:HGNC<br>Symbol;Acc:HGNC:24712]              | chr1  | + |
| [147] | C5AR1             | ENSG00000197405.8  | 2.963257 | 1.11E-41  | complement C5a receptor 1<br>[Source:HGNC<br>Symbol;Acc:HGNC:1338]                           | chr19 | + |
| [148] | SENTP3-<br>EIF4A1 | ENSG00000277957.1  | 2.960422 | 1.03E-08  | SENTP3-EIF4A1 readthrough<br>(NMD candidate)<br>[Source:HGNC<br>Symbol;Acc:HGNC:49182]       | chr17 | + |



|       |            |                    |          |          |                                                                                                                 |       |   |
|-------|------------|--------------------|----------|----------|-----------------------------------------------------------------------------------------------------------------|-------|---|
| [149] | SERPINB10  | ENSG00000242550.6  | 2.94732  | 1.08E-05 | serpin family B member 10<br>[Source:HGNC<br>Symbol;Acc:HGNC:8942]                                              | chr18 | + |
| [150] | CRISPLD2   | ENSG00000103196.12 | 2.943871 | 2.79E-20 | cysteine rich secretory protein<br>LCCL domain containing 2<br>[Source:HGNC<br>Symbol;Acc:HGNC:25248]           | chr16 | + |
| [151] | AC022217.2 | ENSG00000253295.2  | 2.942618 | 4.85E-06 | novel transcript                                                                                                | chr5  | + |
| [152] | ADGRD1     | ENSG00000111452.13 | 2.941348 | 4.13E-06 | adhesion G protein-coupled<br>receptor D1 [Source:HGNC<br>Symbol;Acc:HGNC:19893]                                | chr12 | + |
| [153] | UNC13D     | ENSG00000092929.11 | 2.940452 | 8.63E-08 | unc-13 homoLog D<br>[Source:HGNC<br>Symbol;Acc:HGNC:23147]                                                      | chr17 | - |
| [154] | MAFB       | ENSG00000204103.4  | 2.934381 | 1.34E-90 | MAF bZIP transcription factor<br>B [Source:HGNC<br>Symbol;Acc:HGNC:6408]                                        | chr20 | - |
| [155] | PCK1       | ENSG00000124253.11 | 2.92488  | 4.72E-05 | phosphoenolpyruvate<br>carboxykinase 1<br>[Source:HGNC<br>Symbol;Acc:HGNC:8724]                                 | chr20 | + |
| [156] | ZNF606     | ENSG00000166704.11 | 2.923542 | 2.42E-05 | zinc finger protein 606<br>[Source:HGNC<br>Symbol;Acc:HGNC:25879]                                               | chr19 | - |
| [157] | LINC00622  | ENSG00000260941.1  | 2.91903  | 1.78E-28 | long intergenic non-protein<br>coding RNA 622<br>[Source:HGNC<br>Symbol;Acc:HGNC:44251]                         | chr1  | - |
| [158] | AL031602.2 | ENSG00000287691.1  | 2.9155   | 5.06E-05 | novel transcript, antisense to<br>RNF19B                                                                        | chr1  | + |
| [159] | AL157388.1 | ENSG00000229272.2  | 2.913517 | 5.26E-05 | novel transcript                                                                                                | chr10 | - |
| [160] | AC108517.2 | ENSG00000286097.1  | 2.910364 | 4.93E-07 | novel transcript                                                                                                | chr4  | - |
| [161] | SPOCK2     | ENSG00000107742.13 | 2.906413 | 5.29E-05 | SPARC (osteonectin), cwcw<br>and kazal like domains<br>proteoglycan 2<br>[Source:HGNC<br>Symbol;Acc:HGNC:13564] | chr10 | - |
| [162] | NMRAL2P    | ENSG00000171658.8  | 2.894806 | 3.47E-11 | NmrA like redox sensor 2,<br>pseudogene [Source:HGNC<br>Symbol;Acc:HGNC:52332]                                  | chr3  | + |
| [163] | SESN2      | ENSG00000130766.5  | 2.884742 | 0        | sestrin 2 [Source:HGNC<br>Symbol;Acc:HGNC:20746]                                                                | chr1  | + |
| [164] | CYP4F3     | ENSG00000186529.16 | 2.876757 | 1.69E-05 | cytochrome P450 family 4<br>subfamily F member 3<br>[Source:HGNC<br>Symbol;Acc:HGNC:2646]                       | chr19 | + |
| [165] | LINC00334  | ENSG00000182586.9  | 2.863991 | 7.32E-05 | long intergenic non-protein<br>coding RNA 334<br>[Source:HGNC<br>Symbol;Acc:HGNC:16425]                         | chr21 | + |
| [166] | AP003721.4 | ENSG00000257052.1  | 2.863991 | 7.32E-05 | novel transcript                                                                                                | chr11 | + |
| [167] | TCP11L2    | ENSG00000166046.11 | 2.849936 | 2.36E-24 | t-complex 11 like 2<br>[Source:HGNC<br>Symbol;Acc:HGNC:28627]                                                   | chr12 | + |
| [168] | NATD1      | ENSG00000274180.1  | 2.842175 | 3.46E-31 | N-acetyltransferase domain<br>containing 1 [Source:HGNC<br>Symbol;Acc:HGNC:30770]                               | chr17 | - |

|       |                  |                    |          |           |                                                                                                                           |       |   |
|-------|------------------|--------------------|----------|-----------|---------------------------------------------------------------------------------------------------------------------------|-------|---|
| [169] | SOX9-AS1         | ENSG00000234899.10 | 2.838408 | 6.10E-05  | SOX9 antisense RNA 1<br>[Source:HGNC<br>Symbol;Acc:HGNC:49321]                                                            | chr17 | - |
| [170] | CEMP1            | ENSG00000205923.3  | 2.837033 | 0.000107  | cementum protein 1<br>[Source:HGNC<br>Symbol;Acc:HGNC:32553]                                                              | chr16 | - |
| [171] | FOXJ1            | ENSG00000129654.8  | 2.835279 | 9.04E-05  | forkhead box J1<br>[Source:HGNC<br>Symbol;Acc:HGNC:3816]                                                                  | chr17 | - |
| [172] | MGAT4A           | ENSG00000071073.13 | 2.831889 | 1.54E-05  | alpha-1,3-mannosyl-<br>glycoprotein 4-beta-N-<br>acetylglucosaminyltransferase<br>A [Source:HGNC<br>Symbol;Acc:HGNC:7047] | chr2  | - |
| [173] | NUPR1            | ENSG00000176046.8  | 2.831097 | 1.06E-280 | nuclear protein 1,<br>transcriptional regulator<br>[Source:HGNC<br>Symbol;Acc:HGNC:29990]                                 | chr16 | - |
| [174] | MIR191           | ENSG00000207605.3  | 2.811346 | 0.000105  | microRNA 191<br>[Source:HGNC<br>Symbol;Acc:HGNC:31561]                                                                    | chr3  | - |
| [175] | CLDN19           | ENSG00000164007.11 | 2.810283 | 0.000106  | claudin 19 [Source:HGNC<br>Symbol;Acc:HGNC:2040]                                                                          | chr1  | - |
| [176] | ZNF114           | ENSG00000178150.10 | 2.808349 | 0.000107  | zinc finger protein 114<br>[Source:HGNC<br>Symbol;Acc:HGNC:12894]                                                         | chr19 | + |
| [177] | ATF3             | ENSG00000162772.17 | 2.807166 | 2.46E-180 | activating transcription factor<br>3 [Source:HGNC<br>Symbol;Acc:HGNC:785]                                                 | chr1  | + |
| [178] | RNF103-<br>CHMP3 | ENSG00000249884.8  | 2.803409 | 2.19E-05  | RNF103-CHMP3 readthrough<br>[Source:HGNC<br>Symbol;Acc:HGNC:38847]                                                        | chr2  | - |
| [179] | ESRP1            | ENSG00000104413.18 | 2.802984 | 1.14E-05  | epithelial splicing regulatory<br>protein 1 [Source:HGNC<br>Symbol;Acc:HGNC:25966]                                        | chr8  | + |
| [180] | MYADML2          | ENSG00000185105.5  | 2.802119 | 3.48E-05  | myeloid associated<br>differentiation marker like 2<br>[Source:HGNC<br>Symbol;Acc:HGNC:34548]                             | chr17 | - |
| [181] | PIP5K1B          | ENSG00000107242.19 | 2.796258 | 6.75E-05  | phosphatidylinositol-4-<br>phosphate 5-kinase type 1 beta<br>[Source:HGNC<br>Symbol;Acc:HGNC:8995]                        | chr9  | + |
| [182] | C3orf85          | ENSG00000241224.8  | 2.792024 | 1.56E-14  | chromosome 3 open reading<br>frame 85 [Source:HGNC<br>Symbol;Acc:HGNC:53432]                                              | chr3  | + |
| [183] | AL160269.1       | ENSG00000285269.2  | 2.786214 | 0.00015   | novel transcript, SLC35D2-<br>HSD17B3 readthrough                                                                         | chr9  | - |
| [184] | WDR49            | ENSG00000174776.11 | 2.784164 | 0.000148  | WD repeat domain 49<br>[Source:HGNC<br>Symbol;Acc:HGNC:26587]                                                             | chr3  | - |
| [185] | ISY1-RAB43       | ENSG00000261796.1  | 2.778204 | 4.02E-51  | ISY1-RAB43 readthrough<br>[Source:HGNC<br>Symbol;Acc:HGNC:42969]                                                          | chr3  | - |
| [186] | AC245100.3       | ENSG00000228626.1  | 2.770193 | 0.000141  | novel pseudogene                                                                                                          | chr1  | - |
| [187] | PIWIL2           | ENSG00000197181.12 | 2.76999  | 2.19E-05  | piwi like RNA-mediated gene<br>silencing 2 [Source:HGNC<br>Symbol;Acc:HGNC:17644]                                         | chr8  | + |

|       |            |                    |          |           |                                                                                   |       |   |
|-------|------------|--------------------|----------|-----------|-----------------------------------------------------------------------------------|-------|---|
| [188] | AL157935.1 | ENSG00000227218.7  | 2.762698 | 3.95E-24  | novel transcript                                                                  | chr9  | + |
| [189] | OVGP1      | ENSG00000085465.13 | 2.758537 | 1.31E-06  | oviductal glycoprotein 1<br>[Source:HGNC<br>Symbol;Acc:HGNC:8524]                 | chr1  | - |
| [190] | KLHL24     | ENSG00000114796.16 | 2.751849 | 1.19E-233 | kelch like family member 24<br>[Source:HGNC<br>Symbol;Acc:HGNC:25947]             | chr3  | + |
| [191] | MSH4       | ENSG00000057468.7  | 2.743112 | 0.000189  | mutS homoLog 4<br>[Source:HGNC<br>Symbol;Acc:HGNC:7327]                           | chr1  | + |
| [192] | BX470209.2 | ENSG00000236507.2  | 2.737528 | 0.000174  | novel transcript                                                                  | chr9  | - |
| [193] | AC087428.1 | ENSG00000287505.1  | 2.737504 | 0.000176  | novel transcript                                                                  | chr3  | - |
| [194] | AC010336.1 | ENSG00000214248.2  | 2.73735  | 2.60E-05  | novel transcript, antisense to<br>LRRC8E                                          | chr19 | - |
| [195] | PDGFB      | ENSG00000100311.17 | 2.737338 | 0.000174  | platelet derived growth factor<br>subunit B [Source:HGNC<br>Symbol;Acc:HGNC:8800] | chr22 | - |
| [196] | TLR9       | ENSG00000239732.3  | 2.737338 | 0.000174  | toll like receptor 9<br>[Source:HGNC<br>Symbol;Acc:HGNC:15633]                    | chr3  | - |
| [197] | AC009108.3 | ENSG00000270020.1  | 2.737295 | 0.000177  | novel transcript                                                                  | chr16 | - |
| [198] | CCR2       | ENSG00000121807.5  | 2.736433 | 0.000178  | C-C motif chemokine receptor<br>2 [Source:HGNC<br>Symbol;Acc:HGNC:1603]           | chr3  | + |
| [199] | MYO1G      | ENSG00000136286.16 | 2.736394 | 0.000175  | myosin IG [Source:HGNC<br>Symbol;Acc:HGNC:13880]                                  | chr7  | - |
| [200] | AL138828.1 | ENSG00000237596.7  | 2.736187 | 1.94E-23  | novel transcript                                                                  | chr6  | - |
| [201] | OLAH       | ENSG00000152463.14 | 2.732731 | 7.53E-06  | oleoyl-ACP hydrolase<br>[Source:HGNC<br>Symbol;Acc:HGNC:25625]                    | chr10 | + |
| [202] | BMF        | ENSG00000104081.14 | 2.715476 | 1.29E-32  | Bcl2 modifying factor<br>[Source:HGNC<br>Symbol;Acc:HGNC:24132]                   | chr15 | - |
| [203] | TG         | ENSG00000042832.12 | 2.713046 | 6.67E-06  | thyroglobulin [Source:HGNC<br>Symbol;Acc:HGNC:11764]                              | chr8  | + |
| [204] | AC022868.2 | ENSG00000286113.1  | 2.709742 | 5.20E-05  | long intergenic non-protein<br>coding RNA 1617                                    | chr8  | + |
| [205] | CD14       | ENSG00000170458.14 | 2.707562 | 2.12E-05  | CD14 molecule<br>[Source:HGNC<br>Symbol;Acc:HGNC:1628]                            | chr5  | - |
| [206] | DHRS2      | ENSG00000100867.14 | 2.707123 | 5.23E-31  | dehydrogenase/reductase 2<br>[Source:HGNC<br>Symbol;Acc:HGNC:18349]               | chr14 | + |
| [207] | IQCN       | ENSG00000130518.17 | 2.699402 | 7.83E-48  | IQ motif containing N<br>[Source:HGNC<br>Symbol;Acc:HGNC:29350]                   | chr19 | - |
| [208] | AGT        | ENSG00000135744.8  | 2.697159 | 9.31E-05  | angiotensinogen<br>[Source:HGNC<br>Symbol;Acc:HGNC:333]                           | chr1  | - |
| [209] | CNTN4      | ENSG00000144619.15 | 2.695478 | 0.000158  | contactin 4 [Source:HGNC<br>Symbol;Acc:HGNC:2174]                                 | chr3  | + |
| [210] | EGLN3      | ENSG00000129521.14 | 2.68587  | 5.88E-07  | egl-9 family hypoxia inducible<br>factor 3 [Source:HGNC<br>Symbol;Acc:HGNC:14661] | chr14 | - |
| [211] | AL137077.2 | ENSG00000283078.1  | 2.684352 | 6.41E-11  | novel transcript                                                                  | chr20 | + |

|       |            |                    |          |           |                                                                                          |       |   |
|-------|------------|--------------------|----------|-----------|------------------------------------------------------------------------------------------|-------|---|
| [212] | RRH        | ENSG00000180245.6  | 2.677651 | 0.00026   | retinal pigment epithelium-derived rhodopsin homoLog [Source:HGNC Symbol;Acc:HGNC:10450] | chr4  | + |
| [213] | AC068506.1 | ENSG00000278464.2  | 2.675931 | 0.000104  | novel transcript                                                                         | chr18 | - |
| [214] | HRNR       | ENSG00000197915.6  | 2.675867 | 4.06E-129 | hornerin [Source:HGNC Symbol;Acc:HGNC:20846]                                             | chr1  | - |
| [215] | ZNF177     | ENSG00000188629.12 | 2.669696 | 0.000287  | zinc finger protein 177 [Source:HGNC Symbol;Acc:HGNC:12966]                              | chr19 | + |
| [216] | PKMP3      | ENSG00000220563.1  | 2.666462 | 1.95E-05  | pyruvate kinase M1/2 pseudogene 3 [Source:HGNC Symbol;Acc:HGNC:44245]                    | chr6  | - |
| [217] | KLHDC7B    | ENSG00000130487.9  | 2.653156 | 4.86E-07  | kelch domain containing 7B [Source:HGNC Symbol;Acc:HGNC:25145]                           | chr22 | + |
| [218] | NGF-AS1    | ENSG00000228035.1  | 2.637768 | 0.000336  | NGF antisense RNA 1 [Source:HGNC Symbol;Acc:HGNC:53922]                                  | chr1  | + |
| [219] | AQP3       | ENSG00000165272.16 | 2.631131 | 6.94E-05  | aquaporin 3 (Gill blood group) [Source:HGNC Symbol;Acc:HGNC:636]                         | chr9  | - |
| [220] | KDM7A      | ENSG00000006459.11 | 2.630778 | 2.49E-108 | lysine demethylase 7A [Source:HGNC Symbol;Acc:HGNC:22224]                                | chr7  | - |
| [221] | AOC3       | ENSG00000131471.7  | 2.629999 | 1.16E-09  | amine oxidase copper containing 3 [Source:HGNC Symbol;Acc:HGNC:550]                      | chr17 | + |
| [222] | GSTM3      | ENSG00000134202.11 | 2.627311 | 0.000146  | glutathione S-transferase mu 3 [Source:HGNC Symbol;Acc:HGNC:4635]                        | chr1  | - |
| [223] | PNRC1      | ENSG00000146278.11 | 2.618825 | 6.33E-151 | proline rich nuclear receptor coactivator 1 [Source:HGNC Symbol;Acc:HGNC:17278]          | chr6  | + |
| [224] | DDIT3      | ENSG00000175197.12 | 2.616806 | 0         | DNA damage inducible transcript 3 [Source:HGNC Symbol;Acc:HGNC:2726]                     | chr12 | - |
| [225] | CREBRF     | ENSG00000164463.12 | 2.6092   | 1.17E-173 | CREB3 regulatory factor [Source:HGNC Symbol;Acc:HGNC:24050]                              | chr5  | + |
| [226] | PRTG       | ENSG00000166450.13 | 2.606044 | 0.000405  | protogenin [Source:HGNC Symbol;Acc:HGNC:26373]                                           | chr15 | - |
| [227] | DISP3      | ENSG00000204624.8  | 2.605127 | 0.000408  | dispatched RND transporter family member 3 [Source:HGNC Symbol;Acc:HGNC:29251]           | chr1  | + |
| [228] | HNF4A      | ENSG00000101076.16 | 2.602077 | 0.00017   | hepatocyte nuclear factor 4 alpha [Source:HGNC Symbol;Acc:HGNC:5024]                     | chr20 | + |
| [229] | DIRAS2     | ENSG00000165023.7  | 2.592641 | 6.12E-09  | DIRAS family GTPase 2 [Source:HGNC Symbol;Acc:HGNC:19323]                                | chr9  | - |
| [230] | FNDCC7     | ENSG00000143107.10 | 2.587827 | 1.19E-05  | fibronectin type III domain containing 7 [Source:HGNC Symbol;Acc:HGNC:26668]             | chr1  | + |
| [231] | ACAN       | ENSG00000157766.17 | 2.58469  | 0.000464  | aggrecan [Source:HGNC Symbol;Acc:HGNC:319]                                               | chr15 | + |

|       |            |                    |          |          |                                                                                                        |       |   |
|-------|------------|--------------------|----------|----------|--------------------------------------------------------------------------------------------------------|-------|---|
| [232] | AC016717.2 | ENSG00000273301.1  | 2.584604 | 3.01E-05 | novel transcript                                                                                       | chr2  | + |
| [233] | EAF1-AS1   | ENSG00000249786.7  | 2.584376 | 1.46E-05 | EAF1 antisense RNA 1<br>[Source:HGNC<br>Symbol;Acc:HGNC:42328]                                         | chr3  | - |
| [234] | MRC1       | ENSG00000260314.3  | 2.584291 | 3.02E-05 | mannose receptor C-type 1<br>[Source:HGNC<br>Symbol;Acc:HGNC:7228]                                     | chr10 | + |
| [235] | ZFH2       | ENSG00000136367.14 | 2.583394 | 0.000122 | zinc finger homeobox 2<br>[Source:HGNC<br>Symbol;Acc:HGNC:20152]                                       | chr14 | - |
| [236] | SHANK2     | ENSG00000162105.19 | 2.579888 | 1.50E-05 | SH3 and multiple ankyrin<br>repeat domains 2<br>[Source:HGNC<br>Symbol;Acc:HGNC:14295]                 | chr11 | - |
| [237] | AC006538.1 | ENSG00000261342.1  | 2.578608 | 4.34E-17 | novel transcript                                                                                       | chr19 | - |
| [238] | KCNJ3      | ENSG00000162989.5  | 2.574115 | 0.000152 | potassium inwardly rectifying<br>channel subfamily J member 3<br>[Source:HGNC<br>Symbol;Acc:HGNC:6264] | chr2  | + |
| [239] | BAMBI      | ENSG00000095739.11 | 2.572906 | 5.18E-16 | BMP and activin membrane<br>bound inhibitor<br>[Source:HGNC<br>Symbol;Acc:HGNC:30251]                  | chr10 | + |
| [240] | ID2        | ENSG00000115738.10 | 2.559267 | 0        | inhibitor of DNA binding 2<br>[Source:HGNC<br>Symbol;Acc:HGNC:5361]                                    | chr2  | + |
| [241] | C1orf61    | ENSG00000125462.18 | 2.554901 | 2.36E-07 | MIR9-1 host gene<br>[Source:HGNC<br>Symbol;Acc:HGNC:30780]                                             | chr1  | - |
| [242] | TUSC3      | ENSG00000104723.21 | 2.549187 | 2.57E-05 | tumor suppressor candidate 3<br>[Source:HGNC<br>Symbol;Acc:HGNC:30242]                                 | chr8  | + |
| [243] | COL20A1    | ENSG00000101203.16 | 2.545362 | 0.00021  | collagen type XX alpha 1 chain<br>[Source:HGNC<br>Symbol;Acc:HGNC:14670]                               | chr20 | + |
| [244] | RPL3L      | ENSG00000140986.8  | 2.54158  | 0.000622 | ribosomal protein L3 like<br>[Source:HGNC<br>Symbol;Acc:HGNC:10351]                                    | chr16 | - |
| [245] | RTL5       | ENSG00000242732.4  | 2.539789 | 8.37E-11 | retrotransposon Gag like 5<br>[Source:HGNC<br>Symbol;Acc:HGNC:29430]                                   | chrX  | - |
| [246] | AKNA       | ENSG00000106948.16 | 2.537497 | 3.32E-42 | AT-hook transcription factor<br>[Source:HGNC<br>Symbol;Acc:HGNC:24108]                                 | chr9  | - |
| [247] | KRTAP13-2  | ENSG00000182816.9  | 2.535435 | 0.000619 | keratin associated protein 13-2<br>[Source:HGNC<br>Symbol;Acc:HGNC:18923]                              | chr21 | - |
| [248] | S1PR1      | ENSG00000170989.9  | 2.533316 | 5.88E-09 | sphingosine-1-phosphate<br>receptor 1 [Source:HGNC<br>Symbol;Acc:HGNC:3165]                            | chr1  | + |
| [249] | AL606500.1 | ENSG00000287064.1  | 2.532006 | 5.01E-10 | novel transcript                                                                                       | chr1  | + |
| [250] | AC125257.1 | ENSG00000259623.1  | 2.528314 | 0.00023  | novel transcript, sense<br>overlapping to KLHL11                                                       | chr17 | - |
| [251] | ERBB3      | ENSG00000065361.15 | 2.523134 | 3.00E-05 | erb-b2 receptor tyrosine<br>kinase 3 [Source:HGNC<br>Symbol;Acc:HGNC:3431]                             | chr12 | + |

|       |            |                    |          |          |                                                                                                |       |   |
|-------|------------|--------------------|----------|----------|------------------------------------------------------------------------------------------------|-------|---|
| [252] | TRIM54     | ENSG00000138100.13 | 2.516766 | 2.53E-05 | tripartite motif containing 54<br>[Source:HGNC<br>Symbol;Acc:HGNC:16008]                       | chr2  | + |
| [253] | PLCL1      | ENSG00000115896.16 | 2.515448 | 2.34E-06 | phospholipase C like 1<br>(inactive) [Source:HGNC<br>Symbol;Acc:HGNC:9063]                     | chr2  | + |
| [254] | MYCT1      | ENSG00000120279.6  | 2.5123   | 0.00071  | MYC target 1 [Source:HGNC<br>Symbol;Acc:HGNC:23172]                                            | chr6  | + |
| [255] | MORC1      | ENSG00000114487.10 | 2.509442 | 4.23E-32 | MORC family CW-type zinc<br>finger 1 [Source:HGNC<br>Symbol;Acc:HGNC:7198]                     | chr3  | - |
| [256] | AC144831.1 | ENSG00000261888.1  | 2.509218 | 7.55E-05 | novel transcript                                                                               | chr17 | + |
| [257] | AL139130.1 | ENSG00000237390.1  | 2.49687  | 0.000355 | novel transcript                                                                               | chr1  | + |
| [258] | CDKL3      | ENSG00000006837.12 | 2.493738 | 1.58E-05 | cyclin dependent kinase like 3<br>[Source:HGNC<br>Symbol;Acc:HGNC:15483]                       | chr5  | - |
| [259] | SLC6A9     | ENSG00000196517.11 | 2.483774 | 4.33E-46 | solute carrier family 6 member<br>9 [Source:HGNC<br>Symbol;Acc:HGNC:11056]                     | chr1  | - |
| [260] | CD163      | ENSG00000177575.12 | 2.482114 | 0.0008   | CD163 molecule<br>[Source:HGNC<br>Symbol;Acc:HGNC:1631]                                        | chr12 | - |
| [261] | LINC00917  | ENSG00000168367.11 | 2.480641 | 8.97E-05 | long intergenic non-protein<br>coding RNA 917<br>[Source:HGNC<br>Symbol;Acc:HGNC:48607]        | chr16 | - |
| [262] | NRCAM      | ENSG00000091129.20 | 2.480298 | 3.47E-05 | neuronal cell adhesion<br>molecule [Source:HGNC<br>Symbol;Acc:HGNC:7994]                       | chr7  | - |
| [263] | AC051619.5 | ENSG00000259520.6  | 2.474166 | 0.000879 | novel transcript, antisense to<br>SLC28A2                                                      | chr15 | - |
| [264] | DYDC2      | ENSG00000133665.13 | 2.471525 | 0.000486 | DPY30 domain containing 2<br>[Source:HGNC<br>Symbol;Acc:HGNC:23468]                            | chr10 | + |
| [265] | MAB21L3    | ENSG00000173212.4  | 2.47132  | 4.58E-07 | mab-21 like 3 [Source:HGNC<br>Symbol;Acc:HGNC:26787]                                           | chr1  | + |
| [266] | ATP6V0D2   | ENSG00000147614.4  | 2.46874  | 3.86E-97 | ATPase H <sup>+</sup> transporting V0<br>subunit d2 [Source:HGNC<br>Symbol;Acc:HGNC:18266]     | chr8  | + |
| [267] | ADAMTSL4   | ENSG00000143382.14 | 2.464102 | 1.62E-10 | ADAMTS like 4<br>[Source:HGNC<br>Symbol;Acc:HGNC:19706]                                        | chr1  | + |
| [268] | MRNIP      | ENSG00000161010.15 | 2.460702 | 2.65E-09 | MRN complex interacting<br>protein [Source:HGNC<br>Symbol;Acc:HGNC:30817]                      | chr5  | - |
| [269] | MYLIP      | ENSG00000007944.15 | 2.459974 | 1.47E-22 | myosin regulatory light chain<br>interacting protein<br>[Source:HGNC<br>Symbol;Acc:HGNC:21155] | chr6  | + |
| [270] | AC004453.2 | ENSG00000279853.1  | 2.453484 | 0.00078  | tec                                                                                            | chr7  | - |
| [271] | IDH1       | ENSG00000138413.13 | 2.451229 | 0        | isocitrate dehydrogenase<br>(NADP(+)) 1 [Source:HGNC<br>Symbol;Acc:HGNC:5382]                  | chr2  | - |
| [272] | TEX54      | ENSG00000283268.1  | 2.450338 | 9.76E-05 | testis expressed 54<br>[Source:HGNC<br>Symbol;Acc:HGNC:53729]                                  | chr11 | - |

|       |            |                    |          |           |                                                                                                                               |       |   |
|-------|------------|--------------------|----------|-----------|-------------------------------------------------------------------------------------------------------------------------------|-------|---|
| [273] | TCL6       | ENSG00000187621.14 | 2.448647 | 1.66E-09  | T cell leukemia/lymphoma 6<br>[Source:HGNC<br>Symbol;Acc:HGNC:13463]                                                          | chr14 | + |
| [274] | MUC17      | ENSG00000169876.14 | 2.439946 | 0.00107   | mucin 17, cell surface<br>associated [Source:HGNC<br>Symbol;Acc:HGNC:16800]                                                   | chr7  | + |
| [275] | CPNE5      | ENSG00000124772.12 | 2.439676 | 0.001071  | copine 5 [Source:HGNC<br>Symbol;Acc:HGNC:2318]                                                                                | chr6  | - |
| [276] | ADAM30     | ENSG00000134249.7  | 2.439454 | 0.001072  | ADAM metalloproteinase<br>domain 30 [Source:HGNC<br>Symbol;Acc:HGNC:208]                                                      | chr1  | - |
| [277] | WFIKN2     | ENSG00000173714.8  | 2.439454 | 0.001072  | WAP, follistatin/kazal,<br>immunoglobulin, kunitz and<br>netrin domain containing 2<br>[Source:HGNC<br>Symbol;Acc:HGNC:30916] | chr17 | + |
| [278] | MIR7-3HG   | ENSG00000176840.12 | 2.438609 | 0.001077  | MIR7-3 host gene<br>[Source:HGNC<br>Symbol;Acc:HGNC:30049]                                                                    | chr19 | + |
| [279] | TBC1D29P   | ENSG00000266733.7  | 2.438609 | 0.001077  | TBC1 domain family member<br>29, pseudogene<br>[Source:HGNC<br>Symbol;Acc:HGNC:24509]                                         | chr17 | + |
| [280] | AC005393.1 | ENSG00000276445.1  | 2.435954 | 0.000188  | novel transcript                                                                                                              | chr19 | - |
| [281] | AC027644.4 | ENSG00000284461.2  | 2.434045 | 0.000535  | novel transcript                                                                                                              | chr7  | + |
| [282] | BTG2       | ENSG00000159388.6  | 2.424563 | 1.85E-15  | BTG anti-proliferation factor 2<br>[Source:HGNC<br>Symbol;Acc:HGNC:1131]                                                      | chr1  | + |
| [283] | KLF5       | ENSG00000102554.14 | 2.419831 | 3.69E-151 | Kruppel like factor 5<br>[Source:HGNC<br>Symbol;Acc:HGNC:6349]                                                                | chr13 | + |
| [284] | SPTBN2     | ENSG00000173898.13 | 2.419723 | 0.000171  | spectrin beta, non-<br>erythrocytic 2 [Source:HGNC<br>Symbol;Acc:HGNC:11276]                                                  | chr11 | - |
| [285] | BIRC3      | ENSG0000023445.14  | 2.417533 | 6.33E-44  | baculoviral IAP repeat<br>containing 3 [Source:HGNC<br>Symbol;Acc:HGNC:591]                                                   | chr11 | + |
| [286] | AC139100.1 | ENSG00000267251.2  | 2.411606 | 0.000988  | novel transcript, antisense to<br>PARD6G                                                                                      | chr18 | + |
| [287] | SOX2-OT    | ENSG00000242808.9  | 2.410605 | 0.000546  | SOX2 overlapping transcript<br>[Source:HGNC<br>Symbol;Acc:HGNC:20209]                                                         | chr3  | + |
| [288] | VAMP8      | ENSG00000118640.11 | 2.408514 | 0.001283  | vesicle associated membrane<br>protein 8 [Source:HGNC<br>Symbol;Acc:HGNC:12647]                                               | chr2  | + |
| [289] | AL031432.1 | ENSG00000231953.2  | 2.407127 | 0.001293  | novel transcript                                                                                                              | chr1  | + |
| [290] | MARCKSL1   | ENSG00000175130.7  | 2.406513 | 1.14E-12  | MARCKS like 1<br>[Source:HGNC<br>Symbol;Acc:HGNC:7142]                                                                        | chr1  | - |
| [291] | FAM21FP    | ENSG00000237840.6  | 2.397952 | 1.49E-06  | family with sequence<br>similarity 21 member F,<br>pseudogene [Source:HGNC<br>Symbol;Acc:HGNC:45011]                          | chr10 | - |
| [292] | AC104530.1 | ENSG00000288156.1  | 2.397795 | 7.55E-05  | novel transcript                                                                                                              | chr19 | + |
| [293] | DAPP1      | ENSG00000070190.13 | 2.395303 | 0.00014   | dual adaptor of<br>phosphotyrosine and 3-<br>phosphoinositides 1                                                              | chr4  | + |

|       |            |                    |          |           |                                                                                                                 |       |   |
|-------|------------|--------------------|----------|-----------|-----------------------------------------------------------------------------------------------------------------|-------|---|
|       |            |                    |          |           | [Source:HGNC<br>Symbol;Acc:HGNC:16500]                                                                          |       |   |
| [294] | AL031432.5 | ENSG00000284657.1  | 2.385237 | 9.81E-05  | novel transcript                                                                                                | chr1  | + |
| [295] | OVOL1-AS1  | ENSG00000255120.5  | 2.38372  | 0.001458  | OVOL1 antisense RNA 1<br>[Source:HGNC<br>Symbol;Acc:HGNC:49319]                                                 | chr11 | - |
| [296] | AC010336.8 | ENSG00000286138.1  | 2.382605 | 0.000507  | novel transcript                                                                                                | chr19 | + |
| [297] | PYDC1      | ENSG00000169900.7  | 2.381957 | 0.001472  | pyrin domain containing 1<br>[Source:HGNC<br>Symbol;Acc:HGNC:30261]                                             | chr16 | - |
| [298] | HOXD1      | ENSG00000128645.15 | 2.381009 | 0.000843  | homeobox D1 [Source:HGNC<br>Symbol;Acc:HGNC:5132]                                                               | chr2  | + |
| [299] | LINC002481 | ENSG00000246526.2  | 2.375539 | 0.000706  | long intergenic non-protein<br>coding RNA 2481<br>[Source:HGNC<br>Symbol;Acc:HGNC:27958]                        | chr4  | - |
| [300] | HERPUD1    | ENSG00000051108.15 | 2.373438 | 6.31E-291 | homocysteine inducible ER<br>protein with ubiquitin like<br>domain 1 [Source:HGNC<br>Symbol;Acc:HGNC:13744]     | chr16 | + |
| [301] | AL133457.1 | ENSG00000261038.1  | 2.371722 | 0.001558  | novel transcript                                                                                                | chr6  | - |
| [302] | MT-TK      | ENSG00000210156.1  | 2.36067  | 0.001325  | mitochondrially encoded<br>tRNA-Lys (AAA/G)<br>[Source:HGNC<br>Symbol;Acc:HGNC:7489]                            | chrM  | + |
| [303] | FLG        | ENSG00000143631.10 | 2.357529 | 8.63E-37  | filaggrin [Source:HGNC<br>Symbol;Acc:HGNC:3748]                                                                 | chr1  | - |
| [304] | DRD5P1     | ENSG00000184303.5  | 2.356934 | 0.000522  | dopamine receptor D5<br>pseudogene 1 [Source:HGNC<br>Symbol;Acc:HGNC:3027]                                      | chr2  | - |
| [305] | DRAVIN     | ENSG00000162490.7  | 2.350635 | 4.13E-05  | dorsal inhibitory axon<br>guidance protein<br>[Source:HGNC<br>Symbol;Acc:HGNC:25054]                            | chr1  | + |
| [306] | CD300LB    | ENSG00000178789.9  | 2.350051 | 0.000988  | CD300 molecule like family<br>member b [Source:HGNC<br>Symbol;Acc:HGNC:30811]                                   | chr17 | - |
| [307] | AC087632.2 | ENSG00000259316.11 | 2.348215 | 0.000534  | novel protein                                                                                                   | chr15 | - |
| [308] | GAPDHP33   | ENSG00000240244.3  | 2.340461 | 2.15E-05  | glyceraldehyde 3 phosphate<br>dehydrogenase pseudogene<br>33 [Source:HGNC<br>Symbol;Acc:HGNC:37785]             | chr1  | - |
| [309] | PRX        | ENSG00000105227.14 | 2.339117 | 1.25E-19  | periaxin [Source:HGNC<br>Symbol;Acc:HGNC:13797]                                                                 | chr19 | - |
| [310] | ABHD4      | ENSG00000100439.10 | 2.33717  | 3.57E-68  | abhydrolase domain<br>containing 4, N-acyl<br>phospholipase B<br>[Source:HGNC<br>Symbol;Acc:HGNC:20154]         | chr14 | + |
| [311] | B3GNT7     | ENSG00000156966.7  | 2.330312 | 0.001152  | UDP-GlcNAc:betaGal beta-<br>1,3-N-<br>acetylglucosaminyltransferase<br>7 [Source:HGNC<br>Symbol;Acc:HGNC:18811] | chr2  | + |
| [312] | AF127577.4 | ENSG00000235609.7  | 2.325928 | 4.89E-55  | novel transcript                                                                                                | chr21 | - |
| [313] | HSPA2      | ENSG00000126803.9  | 2.321252 | 1.30E-83  | heat shock protein family A<br>(Hsp70) member 2                                                                 | chr14 | + |



|       |            |                    |          |           |                                                                                                         |       |   |
|-------|------------|--------------------|----------|-----------|---------------------------------------------------------------------------------------------------------|-------|---|
|       |            |                    |          |           | [Source:HGNC<br>Symbol;Acc:HGNC:5235]                                                                   |       |   |
| [314] | TNFSF4     | ENSG00000117586.11 | 2.319433 | 0.000157  | TNF superfamily member 4<br>[Source:HGNC<br>Symbol;Acc:HGNC:11934]                                      | chr1  | - |
| [315] | HSPB9      | ENSG00000260325.2  | 2.319136 | 0.001666  | heat shock protein family B<br>(small) member 9<br>[Source:HGNC<br>Symbol;Acc:HGNC:30589]               | chr17 | + |
| [316] | AOC2       | ENSG00000131480.9  | 2.318926 | 9.42E-14  | amine oxidase copper<br>containing 2 [Source:HGNC<br>Symbol;Acc:HGNC:549]                               | chr17 | + |
| [317] | ASNS       | ENSG00000070669.17 | 2.318301 | 0         | asparagine synthetase<br>(glutamine-hydrolyzing)<br>[Source:HGNC<br>Symbol;Acc:HGNC:753]                | chr7  | - |
| [318] | RXFP4      | ENSG00000173080.5  | 2.316471 | 5.26E-08  | relaxin family peptide/INSL5<br>receptor 4 [Source:HGNC<br>Symbol;Acc:HGNC:14666]                       | chr1  | + |
| [319] | HSD3BP5    | ENSG00000198857.3  | 2.314295 | 8.86E-21  | hydroxy-delta-5-steroid<br>dehydrogenase, 3 beta,<br>pseudogene 5 [Source:HGNC<br>Symbol;Acc:HGNC:5223] | chr1  | + |
| [320] | CYP1A1     | ENSG00000140465.14 | 2.310071 | 4.83E-10  | cytochrome P450 family 1<br>subfamily A member 1<br>[Source:HGNC<br>Symbol;Acc:HGNC:2595]               | chr15 | - |
| [321] | AC037441.1 | ENSG00000248738.6  | 2.309595 | 0.002147  | novel transcript                                                                                        | chr8  | + |
| [322] | ST6GALNAC1 | ENSG00000070526.15 | 2.308784 | 0.002141  | ST6 N-acetylgalactosaminide<br>alpha-2,6-sialyltransferase 1<br>[Source:HGNC<br>Symbol;Acc:HGNC:23614]  | chr17 | - |
| [323] | AC008969.1 | ENSG00000176593.8  | 2.308277 | 0.002161  | novel transcript, antisense to<br>ZNF606                                                                | chr19 | + |
| [324] | VWF        | ENSG00000110799.13 | 2.303523 | 0.000227  | von Willebrand factor<br>[Source:HGNC<br>Symbol;Acc:HGNC:12726]                                         | chr12 | - |
| [325] | ABCA11P    | ENSG00000251595.7  | 2.302797 | 5.97E-05  | ATP binding cassette<br>subfamily A member 11,<br>pseudogene [Source:HGNC<br>Symbol;Acc:HGNC:31]        | chr4  | - |
| [326] | AC008063.2 | ENSG00000233397.3  | 2.297628 | 0.000627  | novel transcript                                                                                        | chr2  | + |
| [327] | MKNK2      | ENSG00000099875.14 | 2.288795 | 0         | MAPK interacting<br>serine/threonine kinase 2<br>[Source:HGNC<br>Symbol;Acc:HGNC:7111]                  | chr19 | - |
| [328] | CCND2      | ENSG00000118971.8  | 2.286916 | 0.00241   | cyclin D2 [Source:HGNC<br>Symbol;Acc:HGNC:1583]                                                         | chr12 | + |
| [329] | C19orf38   | ENSG00000214212.9  | 2.286861 | 0.000156  | chromosome 19 open reading<br>frame 38 [Source:HGNC<br>Symbol;Acc:HGNC:34073]                           | chr19 | + |
| [330] | JMY        | ENSG00000152409.9  | 2.285    | 3.61E-152 | junction mediating and<br>regulatory protein, p53<br>cofactor [Source:HGNC<br>Symbol;Acc:HGNC:28916]    | chr5  | + |
| [331] | OR52K1     | ENSG00000196778.3  | 2.276702 | 0.001455  | olfactory receptor family 52<br>subfamily K member 1                                                    | chr11 | + |

|       |            |                    |          |           |                                                                                                       |       |   |
|-------|------------|--------------------|----------|-----------|-------------------------------------------------------------------------------------------------------|-------|---|
|       |            |                    |          |           | [Source:HGNC<br>Symbol;Acc:HGNC:15222]                                                                |       |   |
| [332] | PMAIP1     | ENSG00000141682.11 | 2.274662 | 4.07E-196 | phorbol-12-myristate-13-<br>acetate-induced protein 1<br>[Source:HGNC<br>Symbol;Acc:HGNC:9108]        | chr18 | + |
| [333] | LINC02009  | ENSG00000283646.2  | 2.273237 | 1.12E-05  | long intergenic non-protein<br>coding RNA 2009<br>[Source:HGNC<br>Symbol;Acc:HGNC:52845]              | chr3  | - |
| [334] | SRSF12     | ENSG00000154548.9  | 2.267682 | 0.000317  | serine and arginine rich<br>splicing factor 12<br>[Source:HGNC<br>Symbol;Acc:HGNC:21220]              | chr6  | - |
| [335] | HMX3       | ENSG00000188620.11 | 2.267039 | 0.000303  | H6 family homeobox 3<br>[Source:HGNC<br>Symbol;Acc:HGNC:5019]                                         | chr10 | + |
| [336] | CCDC62     | ENSG00000130783.14 | 2.265129 | 9.69E-05  | coiled-coil domain containing<br>62 [Source:HGNC<br>Symbol;Acc:HGNC:30723]                            | chr12 | + |
| [337] | RIMKLA     | ENSG00000177181.15 | 2.265126 | 0.000844  | ribosomal modification<br>protein rimK like family<br>member A [Source:HGNC<br>Symbol;Acc:HGNC:28725] | chr1  | + |
| [338] | AL590822.3 | ENSG00000287356.1  | 2.261081 | 0.000723  | novel transcript, antisense to<br>MORN1                                                               | chr1  | + |
| [339] | LINC01081  | ENSG00000268754.4  | 2.261055 | 0.000458  | long intergenic non-protein<br>coding RNA 1081<br>[Source:HGNC<br>Symbol;Acc:HGNC:49124]              | chr16 | - |
| [340] | MAP1LC3B   | ENSG00000140941.14 | 2.260975 | 0         | microtubule associated<br>protein 1 light chain 3 beta<br>[Source:HGNC<br>Symbol;Acc:HGNC:13352]      | chr16 | + |
| [341] | OVOL1      | ENSG00000172818.10 | 2.257694 | 0.002784  | ovo like transcriptional<br>repressor 1 [Source:HGNC<br>Symbol;Acc:HGNC:8525]                         | chr11 | + |
| [342] | MST1L      | ENSG00000186715.11 | 2.256896 | 0.002754  | macrophage stimulating 1 like<br>[Source:HGNC<br>Symbol;Acc:HGNC:7390]                                | chr1  | - |
| [343] | EGFL7      | ENSG00000172889.16 | 2.254288 | 0.001195  | EGF like domain multiple 7<br>[Source:HGNC<br>Symbol;Acc:HGNC:20594]                                  | chr9  | + |
| [344] | CCN2       | ENSG00000118523.6  | 2.250409 | 6.81E-155 | cellular communication<br>network factor 2<br>[Source:HGNC<br>Symbol;Acc:HGNC:2500]                   | chr6  | - |
| [345] | AC008969.2 | ENSG00000286949.1  | 2.246843 | 0.002892  | novel transcript                                                                                      | chr19 | - |
| [346] | GABRR2     | ENSG00000111886.11 | 2.246122 | 0.002001  | gamma-aminobutyric acid<br>type A receptor subunit rho2<br>[Source:HGNC<br>Symbol;Acc:HGNC:4091]      | chr6  | - |
| [347] | AL121749.1 | ENSG00000273312.2  | 2.241643 | 0.003008  | novel transcript                                                                                      | chr10 | - |
| [348] | ATF4P3     | ENSG00000228218.1  | 2.239949 | 6.57E-112 | activating transcription factor<br>4 pseudogene 3<br>[Source:HGNC<br>Symbol;Acc:HGNC:788]             | chr17 | - |

|       |            |                    |          |          |                                                                                                |       |   |
|-------|------------|--------------------|----------|----------|------------------------------------------------------------------------------------------------|-------|---|
| [349] | AL391427.1 | ENSG00000224251.6  | 2.234355 | 0.003073 | novel transcript, antisense to AKR1C2                                                          | chr10 | + |
| [350] | ATF4P4     | ENSG00000256167.1  | 2.233408 | 2.79E-26 | activating transcription factor 4 pseudogene 4<br>[Source:HGNC Symbol;Acc:HGNC:787]            | chr11 | + |
| [351] | LINC01655  | ENSG00000227925.2  | 2.226896 | 0.002813 | long intergenic non-protein coding RNA 1655<br>[Source:HGNC Symbol;Acc:HGNC:52443]             | chr1  | - |
| [352] | BX005195.1 | ENSG00000276204.1  | 2.226896 | 0.002813 | calcium-sensing receptor (CASR) pseudogene                                                     | chr9  | - |
| [353] | LINC01447  | ENSG00000236078.2  | 2.226337 | 0.00319  | long intergenic non-protein coding RNA 1447<br>[Source:HGNC Symbol;Acc:HGNC:50783]             | chr7  | + |
| [354] | AC243960.3 | ENSG00000268355.1  | 2.225275 | 0.003213 | novel transcript                                                                               | chr19 | + |
| [355] | MUC20      | ENSG00000176945.17 | 2.223595 | 0.003238 | mucin 20, cell surface associated [Source:HGNC Symbol;Acc:HGNC:23282]                          | chr3  | + |
| [356] | TMEM268    | ENSG00000157693.15 | 2.220695 | 7.53E-53 | transmembrane protein 268<br>[Source:HGNC Symbol;Acc:HGNC:24513]                               | chr9  | + |
| [357] | AC134878.1 | ENSG00000274231.1  | 2.218299 | 4.66E-05 | asparagine synthetase (glutamine-hydrolyzing) (ASNS) pseudogene                                | chrY  | + |
| [358] | LINC02427  | ENSG00000271538.6  | 2.214038 | 0.002283 | long intergenic non-protein coding RNA 2427<br>[Source:HGNC Symbol;Acc:HGNC:53358]             | chr4  | - |
| [359] | KCNT1      | ENSG00000107147.13 | 2.212898 | 0.003462 | potassium sodium-activated channel subfamily T member 1<br>[Source:HGNC Symbol;Acc:HGNC:18865] | chr9  | + |
| [360] | IL19       | ENSG00000142224.16 | 2.21272  | 0.003464 | interleukin 19 [Source:HGNC Symbol;Acc:HGNC:5990]                                              | chr1  | + |
| [361] | RPS7P2     | ENSG00000231837.2  | 2.21272  | 0.003464 | ribosomal protein S7 pseudogene 2 [Source:HGNC Symbol;Acc:HGNC:36079]                          | chr1  | + |
| [362] | HSPA1A     | ENSG00000204389.10 | 2.209338 | 8.81E-64 | heat shock protein family A (Hsp70) member 1A<br>[Source:HGNC Symbol;Acc:HGNC:5232]            | chr6  | + |
| [363] | ANKRD22    | ENSG00000152766.6  | 2.208239 | 0.000342 | ankyrin repeat domain 22<br>[Source:HGNC Symbol;Acc:HGNC:28321]                                | chr10 | - |
| [364] | NXF1       | ENSG00000162231.14 | 2.207411 | 0        | nuclear RNA export factor 1<br>[Source:HGNC Symbol;Acc:HGNC:8071]                              | chr11 | - |
| [365] | FIBIN      | ENSG00000176971.4  | 2.203896 | 2.00E-21 | fin bud initiation factor homoLog [Source:HGNC Symbol;Acc:HGNC:33747]                          | chr11 | + |
| [366] | AL022476.1 | ENSG00000230319.1  | 2.203567 | 0.002489 | TTL1 antisense RNA 1<br>[Source:HGNC Symbol;Acc:HGNC:40111]                                    | chr22 | + |
| [367] | DGCR9      | ENSG00000273032.2  | 2.20235  | 8.44E-05 | DiGeorge syndrome critical region gene 5 [Source:NCBI                                          | chr22 | + |

|       |            |                    |          |          |                                                                              |       |   |
|-------|------------|--------------------|----------|----------|------------------------------------------------------------------------------|-------|---|
|       |            |                    |          |          | gene (formerly Entrezgene);Acc:26220]                                        |       |   |
| [368] | SLC6A12    | ENSG00000111181.12 | 2.200025 | 0.003609 | solute carrier family 6 member 12 [Source:HGNC Symbol;Acc:HGNC:11045]        | chr12 | - |
| [369] | NGFR       | ENSG00000064300.9  | 2.198736 | 0.003293 | nerve growth factor receptor [Source:HGNC Symbol;Acc:HGNC:7809]              | chr17 | + |
| [370] | RNU2-62P   | ENSG00000222800.1  | 2.198641 | 0.003294 | RNA, U2 small nuclear 62, pseudogene [Source:HGNC Symbol;Acc:HGNC:48555]     | chr6  | - |
| [371] | MUC16      | ENSG00000181143.15 | 2.192521 | 0.003737 | mucin 16, cell surface associated [Source:HGNC Symbol;Acc:HGNC:15582]        | chr19 | - |
| [372] | ADCY10P1   | ENSG00000161912.18 | 2.189565 | 0.00372  | ADCY10 pseudogene 1 [Source:HGNC Symbol;Acc:HGNC:44143]                      | chr6  | + |
| [373] | NGF        | ENSG00000134259.3  | 2.184012 | 5.24E-12 | nerve growth factor [Source:HGNC Symbol;Acc:HGNC:7808]                       | chr1  | - |
| [374] | AL138878.2 | ENSG00000234115.2  | 2.182445 | 2.33E-20 | isocitrate dehydrogenase 1 (NADP+), soluble (IDH1) pseudogene                | chr6  | - |
| [375] | CD248      | ENSG00000174807.4  | 2.181689 | 0.003621 | CD248 molecule [Source:HGNC Symbol;Acc:HGNC:18219]                           | chr11 | - |
| [376] | AC017104.2 | ENSG00000230047.1  | 2.18114  | 0.003636 | HIGD2A pseudogene 1 [Source:HGNC Symbol;Acc:HGNC:54793]                      | chr2  | - |
| [377] | COL23A1    | ENSG00000050767.17 | 2.177351 | 0.004022 | collagen type XXIII alpha 1 chain [Source:HGNC Symbol;Acc:HGNC:22990]        | chr5  | - |
| [378] | AC017104.1 | ENSG00000224376.1  | 2.170292 | 0.002351 | novel transcript                                                             | chr2  | + |
| [379] | ZNF554     | ENSG00000172006.12 | 2.168949 | 1.13E-15 | zinc finger protein 554 [Source:HGNC Symbol;Acc:HGNC:26629]                  | chr19 | + |
| [380] | RAB44      | ENSG00000255587.9  | 2.168892 | 0.004177 | RAB44, member RAS oncogene family [Source:HGNC Symbol;Acc:HGNC:21068]        | chr6  | + |
| [381] | MTTP       | ENSG00000138823.13 | 2.161824 | 0.004378 | microsomal triglyceride transfer protein [Source:HGNC Symbol;Acc:HGNC:7467]  | chr4  | + |
| [382] | MRGPRE     | ENSG00000184350.11 | 2.160801 | 0.003293 | MAS related GPR family member E [Source:HGNC Symbol;Acc:HGNC:30694]          | chr11 | - |
| [383] | STX17-AS1  | ENSG00000255145.3  | 2.159894 | 0.004339 | STX17 antisense RNA 1 [Source:HGNC Symbol;Acc:HGNC:51174]                    | chr9  | - |
| [384] | PART1      | ENSG00000152931.8  | 2.155555 | 1.23E-07 | prostate androgen-regulated transcript 1 [Source:HGNC Symbol;Acc:HGNC:17263] | chr5  | + |
| [385] | CMYA5      | ENSG00000164309.15 | 2.154561 | 6.24E-12 | cardiomyopathy associated 5 [Source:HGNC Symbol;Acc:HGNC:14305]              | chr5  | + |

|       |            |                    |          |          |                                                                                                        |       |   |
|-------|------------|--------------------|----------|----------|--------------------------------------------------------------------------------------------------------|-------|---|
| [386] | TAS1R1     | ENSG00000173662.21 | 2.154344 | 0.00446  | taste 1 receptor member 1<br>[Source:HGNC<br>Symbol;Acc:HGNC:14448]                                    | chr1  | + |
| [387] | AC068722.2 | ENSG00000273972.1  | 2.147824 | 0.00469  | novel transcript                                                                                       | chr15 | + |
| [388] | PHF24      | ENSG00000122733.12 | 2.143271 | 0.001524 | PHD finger protein 24<br>[Source:HGNC<br>Symbol;Acc:HGNC:29180]                                        | chr9  | + |
| [389] | RPTN       | ENSG00000215853.3  | 2.141245 | 1.62E-07 | repetin [Source:HGNC<br>Symbol;Acc:HGNC:26809]                                                         | chr1  | - |
| [390] | MAF        | ENSG00000178573.7  | 2.140444 | 1.14E-07 | MAF bZIP transcription factor<br>[Source:HGNC<br>Symbol;Acc:HGNC:6776]                                 | chr16 | - |
| [391] | FBXO32     | ENSG00000156804.7  | 2.139916 | 0        | F-box protein 32<br>[Source:HGNC<br>Symbol;Acc:HGNC:16731]                                             | chr8  | - |
| [392] | KCNJ2      | ENSG00000123700.4  | 2.138461 | 1.30E-30 | potassium inwardly rectifying<br>channel subfamily J member 2<br>[Source:HGNC<br>Symbol;Acc:HGNC:6263] | chr17 | + |
| [393] | CLEC18B    | ENSG00000140839.11 | 2.134213 | 0.003555 | C-type lectin domain family<br>18 member B [Source:HGNC<br>Symbol;Acc:HGNC:33849]                      | chr16 | - |
| [394] | CACNA1I    | ENSG00000100346.18 | 2.133684 | 0.004897 | calcium voltage-gated channel<br>subunit alpha1 I<br>[Source:HGNC<br>Symbol;Acc:HGNC:1396]             | chr22 | + |
| [395] | TNNI3      | ENSG00000129991.13 | 2.132414 | 0.004942 | troponin I3, cardiac type<br>[Source:HGNC<br>Symbol;Acc:HGNC:11947]                                    | chr19 | - |
| [396] | AL158151.4 | ENSG00000268707.1  | 2.130865 | 0.003714 | novel transcript                                                                                       | chr9  | + |
| [397] | RFPL3S     | ENSG00000205853.11 | 2.128962 | 3.58E-05 | RFPL3 antisense<br>[Source:HGNC<br>Symbol;Acc:HGNC:9981]                                               | chr22 | - |
| [398] | KRT18P61   | ENSG00000267083.1  | 2.127079 | 0.002928 | keratin 18 pseudogene 61<br>[Source:HGNC<br>Symbol;Acc:HGNC:48888]                                     | chr17 | + |
| [399] | SESN3      | ENSG00000149212.12 | 2.124326 | 6.04E-60 | sestrin 3 [Source:HGNC<br>Symbol;Acc:HGNC:23060]                                                       | chr11 | - |
| [400] | Z83844.3   | ENSG00000285304.1  | 2.121544 | 0.005332 | novel protein                                                                                          | chr22 | + |
| [401] | CSTA       | ENSG00000121552.4  | 2.120137 | 1.87E-07 | cystatin A [Source:HGNC<br>Symbol;Acc:HGNC:2481]                                                       | chr3  | + |
| [402] | BGLAP      | ENSG00000242252.2  | 2.119422 | 0.002061 | bone gamma-<br>carboxyglutamate protein<br>[Source:HGNC<br>Symbol;Acc:HGNC:1043]                       | chr1  | + |
| [403] | PLK2       | ENSG00000145632.15 | 2.118039 | 0        | polo like kinase 2<br>[Source:HGNC<br>Symbol;Acc:HGNC:19699]                                           | chr5  | - |
| [404] | CDC42BPG   | ENSG00000171219.9  | 2.117367 | 0.005264 | CDC42 binding protein kinase<br>gamma [Source:HGNC<br>Symbol;Acc:HGNC:29829]                           | chr11 | - |
| [405] | AC012181.1 | ENSG00000261114.1  | 2.117039 | 4.98E-05 | novel transcript, sense<br>intronic to HERPUD1                                                         | chr16 | + |
| [406] | RAD51AP2   | ENSG00000214842.5  | 2.11423  | 0.005489 | RAD51 associated protein 2<br>[Source:HGNC<br>Symbol;Acc:HGNC:34417]                                   | chr2  | - |
| [407] | AC010198.1 | ENSG00000246331.2  | 2.114213 | 0.005489 | novel transcript                                                                                       | chr12 | + |

|       |            |                    |          |           |                                                                                  |       |   |
|-------|------------|--------------------|----------|-----------|----------------------------------------------------------------------------------|-------|---|
| [408] | AC107959.1 | ENSG00000245025.3  | 2.114187 | 8.80E-49  | novel transcript, antisense to RHOBTB2                                           | chr8  | - |
| [409] | CETP       | ENSG00000087237.12 | 2.111445 | 0.002087  | cholesteryl ester transfer protein [Source:HGNC Symbol;Acc:HGNC:1869]            | chr16 | + |
| [410] | NCOA7      | ENSG00000111912.20 | 2.105356 | 1.50E-171 | nuclear receptor coactivator 7 [Source:HGNC Symbol;Acc:HGNC:21081]               | chr6  | + |
| [411] | STK32A     | ENSG00000169302.16 | 2.103708 | 1.72E-21  | serine/threonine kinase 32A [Source:HGNC Symbol;Acc:HGNC:28317]                  | chr5  | + |
| [412] | ANPEP      | ENSG00000166825.14 | 2.101163 | 0.005663  | alanyl aminopeptidase, membrane [Source:HGNC Symbol;Acc:HGNC:500]                | chr15 | - |
| [413] | AL035448.1 | ENSG00000236526.1  | 2.100822 | 0.005669  | novel transcript                                                                 | chr20 | - |
| [414] | SPX        | ENSG00000134548.11 | 2.099621 | 0.000178  | spexin hormone [Source:HGNC Symbol;Acc:HGNC:28139]                               | chr12 | + |
| [415] | AL031432.4 | ENSG00000284602.1  | 2.096212 | 8.06E-09  | novel transcript                                                                 | chr1  | + |
| [416] | TTN-AS1    | ENSG00000237298.10 | 2.095817 | 0.002821  | TTN antisense RNA 1 [Source:HGNC Symbol;Acc:HGNC:44124]                          | chr2  | + |
| [417] | MISP       | ENSG00000099812.9  | 2.090049 | 0.004442  | mitotic spindle positioning [Source:HGNC Symbol;Acc:HGNC:27000]                  | chr19 | + |
| [418] | IL1A       | ENSG00000115008.5  | 2.088719 | 1.73E-19  | interleukin 1 alpha [Source:HGNC Symbol;Acc:HGNC:5991]                           | chr2  | - |
| [419] | LINC02019  | ENSG00000273356.1  | 2.08248  | 6.97E-05  | long intergenic non-protein coding RNA 2019 [Source:HGNC Symbol;Acc:HGNC:52854]  | chr3  | + |
| [420] | AC002331.1 | ENSG00000286712.1  | 2.081342 | 0.006339  | novel transcript                                                                 | chr16 | + |
| [421] | AC135506.1 | ENSG00000270441.1  | 2.080522 | 0.006215  | laminin subunit beta 2 pseudogene 1 [Source:HGNC Symbol;Acc:HGNC:6488]           | chr3  | - |
| [422] | NR4A3      | ENSG00000119508.18 | 2.07209  | 4.54E-15  | nuclear receptor subfamily 4 group A member 3 [Source:HGNC Symbol;Acc:HGNC:7982] | chr9  | + |
| [423] | AC004988.1 | ENSG00000203446.2  | 2.071683 | 1.88E-14  | SUGCT antisense RNA 1 [Source:HGNC Symbol;Acc:HGNC:40745]                        | chr7  | - |
| [424] | HEXIM1     | ENSG00000186834.3  | 2.070688 | 4.96E-132 | HEXIM P-TEFb complex subunit 1 [Source:HGNC Symbol;Acc:HGNC:24953]               | chr17 | + |
| [425] | LRATD2     | ENSG00000168672.4  | 2.070662 | 2.86E-10  | LRAT domain containing 2 [Source:HGNC Symbol;Acc:HGNC:24166]                     | chr8  | - |
| [426] | ITGB4      | ENSG00000132470.14 | 2.066428 | 0.006042  | integrin subunit beta 4 [Source:HGNC Symbol;Acc:HGNC:6158]                       | chr17 | + |
| [427] | AC005593.1 | ENSG00000279584.1  | 2.065941 | 0.006575  | TEC                                                                              | chr5  | + |
| [428] | AC127002.2 | ENSG00000275265.1  | 2.06204  | 0.003807  | novel transcript                                                                 | chr12 | + |
| [429] | TSPOAP1    | ENSG00000005379.17 | 2.061452 | 0.00692   | TSPO associated protein 1 [Source:HGNC Symbol;Acc:HGNC:16831]                    | chr17 | - |

|       |            |                    |          |           |                                                                                           |       |   |
|-------|------------|--------------------|----------|-----------|-------------------------------------------------------------------------------------------|-------|---|
| [430] | CH25H      | ENSG00000138135.7  | 2.060389 | 1.37E-05  | cholesterol 25-hydroxylase<br>[Source:HGNC<br>Symbol;Acc:HGNC:1907]                       | chr10 | - |
| [431] | AC090004.2 | ENSG00000287059.1  | 2.05787  | 0.000341  | novel transcript                                                                          | chr3  | - |
| [432] | ANKRD18CP  | ENSG00000159712.10 | 2.056538 | 0.004932  | ankyrin repeat domain 18C,<br>pseudogene [Source:HGNC<br>Symbol;Acc:HGNC:43601]           | chr9  | - |
| [433] | AC073111.3 | ENSG00000284048.2  | 2.056508 | 0.005906  | novel transcript                                                                          | chr7  | + |
| [434] | CD55       | ENSG00000196352.15 | 2.054501 | 7.88E-218 | CD55 molecule (Cromer blood<br>group) [Source:HGNC<br>Symbol;Acc:HGNC:2665]               | chr1  | + |
| [435] | AC108517.1 | ENSG00000249111.1  | 2.05067  | 2.14E-07  | novel transcript                                                                          | chr4  | + |
| [436] | C16orf46   | ENSG00000166455.13 | 2.047763 | 0.002585  | chromosome 16 open reading<br>frame 46 [Source:HGNC<br>Symbol;Acc:HGNC:26525]             | chr16 | - |
| [437] | AC073283.3 | ENSG00000273269.3  | 2.047181 | 0.007148  | novel transcript                                                                          | chr2  | - |
| [438] | SLIT1      | ENSG00000187122.17 | 2.041772 | 0.005318  | slit guidance ligand 1<br>[Source:HGNC<br>Symbol;Acc:HGNC:11085]                          | chr10 | - |
| [439] | PLA2G4D    | ENSG00000159337.7  | 2.04174  | 0.007303  | phospholipase A2 group IVD<br>[Source:HGNC<br>Symbol;Acc:HGNC:30038]                      | chr15 | - |
| [440] | AC024082.1 | ENSG00000231923.1  | 2.03749  | 0.006229  | Der1-like domain family,<br>member 2 (DERL2)<br>pseudogene                                | chr7  | + |
| [441] | PTPRR      | ENSG00000153233.13 | 2.034595 | 5.25E-24  | protein tyrosine phosphatase<br>receptor type R<br>[Source:HGNC<br>Symbol;Acc:HGNC:9680]  | chr12 | - |
| [442] | NTN4       | ENSG00000074527.12 | 2.03456  | 6.22E-20  | netrin 4 [Source:HGNC<br>Symbol;Acc:HGNC:13658]                                           | chr12 | - |
| [443] | FAM209A    | ENSG00000124103.9  | 2.033612 | 0.005665  | family with sequence<br>similarity 209 member A<br>[Source:HGNC<br>Symbol;Acc:HGNC:16100] | chr20 | + |
| [444] | PCDHA12    | ENSG00000251664.5  | 2.031779 | 0.005845  | protocadherin alpha 12<br>[Source:HGNC<br>Symbol;Acc:HGNC:8666]                           | chr5  | + |
| [445] | GADD45A    | ENSG00000116717.13 | 2.03003  | 6.32E-197 | growth arrest and DNA<br>damage inducible alpha<br>[Source:HGNC<br>Symbol;Acc:HGNC:4095]  | chr1  | + |
| [446] | TMEM269    | ENSG00000274386.5  | 2.029629 | 0.003332  | transmembrane protein 269<br>[Source:HGNC<br>Symbol;Acc:HGNC:52381]                       | chr1  | + |
| [447] | AC003005.1 | ENSG00000268107.6  | 2.028118 | 0.001761  | novel transcript                                                                          | chr19 | + |
| [448] | LINC00862  | ENSG00000203721.7  | 2.025027 | 0.00159   | long intergenic non-protein<br>coding RNA 862<br>[Source:HGNC<br>Symbol;Acc:HGNC:21901]   | chr1  | - |
| [449] | HEATR4     | ENSG00000187105.8  | 2.024636 | 0.005718  | HEAT repeat containing 4<br>[Source:HGNC<br>Symbol;Acc:HGNC:16761]                        | chr14 | - |
| [450] | AC016925.3 | ENSG00000287796.1  | 2.024422 | 0.008198  | novel transcript                                                                          | chrX  | + |
| [451] | AC011365.1 | ENSG00000254042.2  | 2.018378 | 0.00578   | SLIT3 antisense RNA 2<br>[Source:HGNC<br>Symbol;Acc:HGNC:40551]                           | chr5  | + |

|       |            |                    |          |           |                                                                                          |       |   |
|-------|------------|--------------------|----------|-----------|------------------------------------------------------------------------------------------|-------|---|
| [452] | NEBL       | ENSG00000078114.18 | 2.01785  | 0.001878  | nebulette [Source:HGNC<br>Symbol;Acc:HGNC:16932]                                         | chr10 | - |
| [453] | CTNNA3     | ENSG00000183230.17 | 2.012064 | 0.008428  | catenin alpha 3<br>[Source:HGNC<br>Symbol;Acc:HGNC:2511]                                 | chr10 | - |
| [454] | PINCR      | ENSG00000224294.1  | 2.009538 | 0.008782  | p53-induced noncoding RNA<br>[Source:HGNC<br>Symbol;Acc:HGNC:53590]                      | chrX  | + |
| [455] | MLC1       | ENSG00000100427.15 | 2.009266 | 0.00844   | modulator of VRAC current 1<br>[Source:HGNC<br>Symbol;Acc:HGNC:17082]                    | chr22 | - |
| [456] | RNU6-781P  | ENSG00000252186.1  | 2.009142 | 0.008528  | RNA, U6 small nuclear 781,<br>pseudogene [Source:HGNC<br>Symbol;Acc:HGNC:47744]          | chr12 | + |
| [457] | SNX31      | ENSG00000174226.9  | 2.008973 | 0.008409  | sorting nexin 31<br>[Source:HGNC<br>Symbol;Acc:HGNC:28605]                               | chr8  | - |
| [458] | RNF223     | ENSG00000237330.3  | 2.007028 | 0.008473  | ring finger protein 223<br>[Source:HGNC<br>Symbol;Acc:HGNC:40020]                        | chr1  | - |
| [459] | AC138356.3 | ENSG00000253181.2  | 2.005857 | 0.008549  | novel transcript                                                                         | chr8  | + |
| [460] | BTG1       | ENSG00000133639.5  | 2.00555  | 1.47E-147 | BTG anti-proliferation factor 1<br>[Source:HGNC<br>Symbol;Acc:HGNC:1130]                 | chr12 | - |
| [461] | LINC01822  | ENSG00000229621.2  | 2.000452 | 0.004249  | long intergenic non-protein<br>coding RNA 1822<br>[Source:HGNC<br>Symbol;Acc:HGNC:52627] | chr2  | - |
