# Supplementary material for: In Vitro and In Vivo Enhancement of Temozolomide Effect in Human Glioblastoma by Non-Invasive Application of Cold Atmospheric Plasma
Source: MDPI journal article supplement (doi:10.3390/cancers13174485), 2021-09-06
Supplement: s1 [file s1]

**Supplementary Table 3: List of top 80 up-regulated genes in TMZ treatment**

| Sr. No | Gene Name  | GeneID             | Log2(FC) | P-adj    | Description                                                                                                  | Chromosome | Strand |
|--------|------------|--------------------|----------|----------|--------------------------------------------------------------------------------------------------------------|------------|--------|
| [1]    | PDXP       | ENSG00000241360.2  | 8.790654 | 0.456811 | pyridoxal phosphatase<br>[Source:HGNC<br>Symbol;Acc:HGNC:30259]                                              | chr22      | +      |
| [2]    | AC009133.6 | ENSG00000280893.1  | 8.354358 | 0.249621 | novel transcript                                                                                             | chr16      | +      |
| [3]    | AL671762.1 | ENSG00000285565.1  | 8.009808 | -0.70319 | novel transcript                                                                                             | chr6       | +      |
| [4]    | SVIL2P     | ENSG00000234814.8  | 6.91887  | 0.011704 | supervillin family member 2,<br>pseudogene [Source:HGNC<br>Symbol;Acc:HGNC:44959]                            | chr10      | +      |
| [5]    | FAM72D     | ENSG00000215784.6  | 6.386992 | 0.186367 | family with sequence similarity<br>72 member D [Source:HGNC<br>Symbol;Acc:HGNC:33593]                        | chr1       | +      |
| [6]    | CDC42EP2   | ENSG00000149798.5  | 5.803778 | 0.809202 | CDC42 effector protein 2<br>[Source:HGNC<br>Symbol;Acc:HGNC:16263]                                           | chr11      | +      |
| [7]    | ATP23      | ENSG00000166896.9  | 5.100459 | 0.099163 | ATP23 metallopeptidase and<br>ATP synthase assembly factor<br>homoLog [Source:HGNC<br>Symbol;Acc:HGNC:29452] | chr12      | +      |
| [8]    | AC092641.1 | ENSG00000227176.1  | 5.073101 | 0.763694 | NSA2 pseudogene 5<br>[Source:HGNC<br>Symbol;Acc:HGNC:54584]                                                  | chr2       | -      |
| [9]    | AP001092.1 | ENSG00000237410.1  | 4.975375 | 0.917648 | NRXN2 antisense RNA 1<br>[Source:HGNC<br>Symbol;Acc:HGNC:40416]                                              | chr11      | +      |
| [10]   | MAGOH3P    | ENSG00000270975.1  | 4.909637 | 0.984236 | mago homoLog 3, pseudogene<br>[Source:HGNC<br>Symbol;Acc:HGNC:20020]                                         | chr14      | +      |
| [11]   | ELMO3      | ENSG00000102890.16 | 4.755558 | 0.227039 | engulfment and cell motility 3<br>[Source:HGNC<br>Symbol;Acc:HGNC:17289]                                     | chr16      | +      |
| [12]   | AP005233.2 | ENSG00000260877.2  | 4.700475 | 0.964178 | novel transcript                                                                                             | chr11      | +      |
| [13]   | PYGM       | ENSG00000068976.14 | 4.523836 | -0.71648 | glycogen phosphorylase, muscle<br>associated [Source:HGNC<br>Symbol;Acc:HGNC:9726]                           | chr11      | -      |
| [14]   | GDF5       | ENSG00000125965.9  | 4.32972  | 0.215926 | growth differentiation factor 5<br>[Source:HGNC<br>Symbol;Acc:HGNC:4220]                                     | chr20      | -      |
| [15]   | ERG        | ENSG00000157554.19 | 4.30041  | 0.050171 | ETS transcription factor ERG<br>[Source:HGNC<br>Symbol;Acc:HGNC:3446]                                        | chr21      | -      |

|      |                |                    |          |          |                                                                                               |       |   |
|------|----------------|--------------------|----------|----------|-----------------------------------------------------------------------------------------------|-------|---|
| [16] | NFATC4         | ENSG00000100968.14 | 4.28568  | 1.328864 | nuclear factor of activated T cells 4 [Source:HGNC Symbol;Acc:HGNC:7778]                      | chr14 | + |
| [17] | AC010624.5     | ENSG00000287001.1  | 4.284199 | 0.011924 | novel transcript                                                                              | chr19 | - |
| [18] | ENO3           | ENSG00000108515.17 | 4.247756 | 0.189319 | enolase 3 [Source:HGNC Symbol;Acc:HGNC:3354]                                                  | chr17 | + |
| [19] | MBOAT1         | ENSG00000172197.11 | 4.191913 | 0.086531 | membrane bound O-acyltransferase domain containing 1 [Source:HGNC Symbol;Acc:HGNC:21579]      | chr6  | - |
| [20] | CRYZL2P-SEC16B | ENSG00000254154.8  | 4.187813 | 0.075692 | CRYZL2P-SEC16B readthrough [Source:HGNC Symbol;Acc:HGNC:53757]                                | chr1  | - |
| [21] | GRIA3          | ENSG00000125675.18 | 4.16156  | 0.112235 | glutamate ionotropic receptor AMPA type subunit 3 [Source:HGNC Symbol;Acc:HGNC:4573]          | chrX  | + |
| [22] | TSSK5P         | ENSG00000227473.1  | 4.027879 | 0.657715 | testis specific serine kinase 5, pseudogene [Source:HGNC Symbol;Acc:HGNC:31931]               | chr8  | - |
| [23] | NMU            | ENSG00000109255.11 | 3.993564 | 0.005343 | neuromedin U [Source:HGNC Symbol;Acc:HGNC:7859]                                               | chr4  | - |
| [24] | COL5A3         | ENSG00000080573.7  | 3.97997  | 0.271222 | collagen type V alpha 3 chain [Source:HGNC Symbol;Acc:HGNC:14864]                             | chr19 | - |
| [25] | OPN1SW         | ENSG00000128617.2  | 3.933764 | 0.687186 | opsin 1, short wave sensitive [Source:HGNC Symbol;Acc:HGNC:1012]                              | chr7  | - |
| [26] | RPS10-NUDT3    | ENSG00000270800.3  | 3.927109 | NA       | RPS10-NUDT3 readthrough [Source:HGNC Symbol;Acc:HGNC:49181]                                   | chr6  | - |
| [27] | AC005480.1     | ENSG00000258891.1  | 3.912291 | 0.77664  | novel transcript, antisense to ZNF410                                                         | chr14 | - |
| [28] | HIF1A-AS3      | ENSG00000258667.2  | 3.904495 | 0.954607 | HIF1A antisense RNA 3 [Source:HGNC Symbol;Acc:HGNC:54284]                                     | chr14 | - |
| [29] | C1QTNF9B       | ENSG00000205863.10 | 3.897132 | 0.192879 | C1q and TNF related 9B [Source:HGNC Symbol;Acc:HGNC:34072]                                    | chr13 | - |
| [30] | C1orf116       | ENSG00000182795.13 | 3.8802   | NA       | chromosome 1 open reading frame 116 [Source:HGNC Symbol;Acc:HGNC:28667]                       | chr1  | - |
| [31] | EIF4A1P9       | ENSG00000262953.1  | 3.870801 | 0.883357 | eukaryotic translation initiation factor 4A1 pseudogene 9 [Source:HGNC Symbol;Acc:HGNC:37928] | chr17 | - |

|      |             |                    |          |          |                                                                                          |       |   |
|------|-------------|--------------------|----------|----------|------------------------------------------------------------------------------------------|-------|---|
| [32] | DMBX1       | ENSG00000197587.10 | 3.829056 | 1.283838 | diencephalon/mesencephalon homeobox 1 [Source:HGNC Symbol;Acc:HGNC:19026]                | chr1  | + |
| [33] | AC013643.2  | ENSG00000253875.2  | 3.818946 | 0.775396 | novel transcript                                                                         | chr8  | + |
| [34] | CARD16      | ENSG00000204397.8  | 3.728535 | 0.900266 | caspase recruitment domain family member 16 [Source:HGNC Symbol;Acc:HGNC:33701]          | chr11 | - |
| [35] | PLSCR3      | ENSG00000187838.17 | 3.707013 | 0.528082 | phospholipid scramblase 3 [Source:HGNC Symbol;Acc:HGNC:16495]                            | chr17 | - |
| [36] | 5_8S_rRNA   | ENSG00000277739.1  | 3.697777 | 0.620011 | 5.8S ribosomal RNA [Source:RFAM;Acc:RF00002]                                             | chr21 | + |
| [37] | RNA5-8SN1   | ENSG00000278189.1  | 3.697777 | 0.620011 | RNA, 5.8S ribosomal N1 [Source:HGNC Symbol;Acc:HGNC:53517]                               | chr21 | + |
| [38] | RNA5-8SN2   | ENSG00000278233.1  | 3.697777 | 0.620011 | RNA, 5.8S ribosomal N2 [Source:HGNC Symbol;Acc:HGNC:53521]                               | chr21 | + |
| [39] | RNA5-8SN3   | ENSG00000275215.1  | 3.697777 | 0.620011 | RNA, 5.8S ribosomal N3 [Source:HGNC Symbol;Acc:HGNC:53525]                               | chr21 | + |
| [40] | BMS1P1      | ENSG00000204177.10 | 3.681547 | 1.382871 | BMS1 pseudogene 1 [Source:HGNC Symbol;Acc:HGNC:23649]                                    | chr10 | + |
| [41] | AP001042.1  | ENSG00000205622.11 | 3.666836 | 0.484591 | novel transcript                                                                         | chr21 | - |
| [42] | AC008163.1  | ENSG00000233491.8  | 3.654234 | 0.079642 | novel pseudogene containing cadherin repeats                                             | chr7  | - |
| [43] | HSPB6       | ENSG00000004776.13 | 3.650925 | 0.107049 | heat shock protein family B (small) member 6 [Source:HGNC Symbol;Acc:HGNC:26511]         | chr19 | - |
| [44] | SLC14A1     | ENSG00000141469.18 | 3.595615 | 0.60588  | solute carrier family 14 member 1 (Kidd blood group) [Source:HGNC Symbol;Acc:HGNC:10918] | chr18 | + |
| [45] | PMF1-BGLAP  | ENSG00000260238.6  | 3.586703 | 1.17072  | PMF1-BGLAP readthrough [Source:HGNC Symbol;Acc:HGNC:42953]                               | chr1  | + |
| [46] | XDH         | ENSG00000158125.10 | 3.561086 | -0.63873 | xanthine dehydrogenase [Source:HGNC Symbol;Acc:HGNC:12805]                               | chr2  | - |
| [47] | MSH5-SAPCD1 | ENSG00000255152.8  | 3.445346 | 1.098256 | MSH5-SAPCD1 readthrough (NMD candidate) [Source:HGNC Symbol;Acc:HGNC:41994]              | chr6  | + |

|      |                  |                    |          |          |                                                                                                  |       |   |
|------|------------------|--------------------|----------|----------|--------------------------------------------------------------------------------------------------|-------|---|
| [48] | DNLZ             | ENSG00000213221.5  | 3.441806 | 0.020381 | DNL-type zinc finger<br>[Source:HGNC<br>Symbol;Acc:HGNC:33879]                                   | chr9  | - |
| [49] | GNB3             | ENSG00000111664.10 | 3.438486 | 0.006444 | G protein subunit beta 3<br>[Source:HGNC<br>Symbol;Acc:HGNC:4400]                                | chr12 | + |
| [50] | GRIK5            | ENSG00000105737.9  | 3.42963  | -0.38605 | glutamate ionotropic receptor<br>kainate type subunit 5<br>[Source:HGNC<br>Symbol;Acc:HGNC:4583] | chr19 | - |
| [51] | AC009542.1       | ENSG00000231794.5  | 3.424139 | 0.649091 | novel transcript, antisense to<br>WDR91                                                          | chr7  | + |
| [52] | AC079313.1       | ENSG00000258086.1  | 3.400609 | 0.07073  | novel transcript, antisense to<br>ZNF385A, GPR84, ITGA5 and<br>GTSF1                             | chr12 | + |
| [53] | PPFIA2           | ENSG00000139220.16 | 3.396283 | 0.140413 | PTPRF interacting protein alpha<br>2 [Source:HGNC<br>Symbol;Acc:HGNC:9246]                       | chr12 | - |
| [54] | POC1B-<br>GALNT4 | ENSG00000259075.6  | 3.346762 | NA       | POC1B-GALNT4 readthrough<br>[Source:HGNC<br>Symbol;Acc:HGNC:42957]                               | chr12 | - |
| [55] | ADGRF2           | ENSG00000164393.8  | 3.335385 | 0.284489 | adhesion G protein-coupled<br>receptor F2 [Source:HGNC<br>Symbol;Acc:HGNC:18991]                 | chr6  | + |
| [56] | Y_RNA            | ENSG00000200419.1  | 3.32602  | 0.032089 | Y RNA<br>[Source:RFAM;Acc:RF00019]                                                               | chr15 | + |
| [57] | AL591684.2       | ENSG00000254929.6  | 3.310497 | 0.933861 | novel transcript                                                                                 | chr10 | - |
| [58] | PGGHG            | ENSG00000142102.16 | 3.298142 | 0.869404 | protein-<br>glucosylgalactosylhydroxylsine<br>glucosidase [Source:HGNC<br>Symbol;Acc:HGNC:26210] | chr11 | + |
| [59] | ELN-AS1          | ENSG00000232415.1  | 3.265965 | 0.99909  | ELN antisense RNA 1<br>[Source:HGNC<br>Symbol;Acc:HGNC:40212]                                    | chr7  | - |
| [60] | PEAR1            | ENSG00000187800.13 | 3.256126 | -0.53419 | platelet endothelial aggregation<br>receptor 1 [Source:HGNC<br>Symbol;Acc:HGNC:33631]            | chr1  | + |
| [61] | SNORA80A         | ENSG00000200792.1  | 3.239645 | 0.000187 | small nucleolar RNA, H/ACA<br>box 80A [Source:HGNC<br>Symbol;Acc:HGNC:32666]                     | chr21 | - |
| [62] | TICAM2           | ENSG00000243414.5  | 3.237514 | NA       | toll like receptor adaptor<br>molecule 2 [Source:HGNC<br>Symbol;Acc:HGNC:21354]                  | chr5  | - |
| [63] | TMPRSS11E        | ENSG00000087128.10 | 3.226192 | NA       | transmembrane serine protease<br>11E [Source:HGNC<br>Symbol;Acc:HGNC:24465]                      | chr4  | + |

|      |            |                    |          |          |                                                                                   |       |   |
|------|------------|--------------------|----------|----------|-----------------------------------------------------------------------------------|-------|---|
| [64] | DRGX       | ENSG00000165606.8  | 3.189911 | -0.00052 | dorsal root ganglia homeobox<br>[Source:HGNC<br>Symbol;Acc:HGNC:21536]            | chr10 | - |
| [65] | ASGR1      | ENSG00000141505.12 | 3.154534 | 0.605036 | asiaLoglycoprotein receptor 1<br>[Source:HGNC<br>Symbol;Acc:HGNC:742]             | chr17 | - |
| [66] | TMPRSS11F  | ENSG00000198092.6  | 3.139908 | -1.18228 | transmembrane serine protease<br>11F [Source:HGNC<br>Symbol;Acc:HGNC:29994]       | chr4  | - |
| [67] | RN7SL823P  | ENSG00000263595.2  | 3.133108 | 0.003036 | RNA, 7SL, cytoplasmic 823,<br>pseudogene [Source:HGNC<br>Symbol;Acc:HGNC:46839]   | chr19 | - |
| [68] | AL512603.1 | ENSG00000286442.1  | 3.097356 | 0.280014 | novel transcript                                                                  | chr10 | + |
| [69] | GREM2      | ENSG00000180875.5  | 3.080702 | 0.146003 | gremlin 2, DAN family BMP<br>antagonist [Source:HGNC<br>Symbol;Acc:HGNC:17655]    | chr1  | - |
| [70] | ZBTB9      | ENSG00000213588.6  | 3.071934 | 1.141274 | zinc finger and BTB domain<br>containing 9 [Source:HGNC<br>Symbol;Acc:HGNC:28323] | chr6  | + |
| [71] | RN7SL217P  | ENSG00000264706.2  | 3.067268 | 0.036611 | RNA, 7SL, cytoplasmic 217,<br>pseudogene [Source:HGNC<br>Symbol;Acc:HGNC:46233]   | chr3  | - |
| [72] | EPSTI1     | ENSG00000133106.14 | 3.063561 | 0.192257 | epithelial stromal interaction 1<br>[Source:HGNC<br>Symbol;Acc:HGNC:16465]        | chr13 | - |
| [73] | RN7SKP230  | ENSG00000202512.1  | 3.05839  | NA       | RN7SK pseudogene 230<br>[Source:HGNC<br>Symbol;Acc:HGNC:45954]                    | chr5  | - |
| [74] | RN7SL77P   | ENSG00000240837.3  | 3.057757 | 0.083916 | RNA, 7SL, cytoplasmic 77,<br>pseudogene [Source:HGNC<br>Symbol;Acc:HGNC:46093]    | chr14 | + |
| [75] | MYO16      | ENSG00000041515.16 | 3.051369 | -0.69228 | myosin XVI [Source:HGNC<br>Symbol;Acc:HGNC:29822]                                 | chr13 | + |
| [76] | AC093512.2 | ENSG00000285043.1  | 3.044571 | 0.736987 | novel protein                                                                     | chr16 | + |
| [77] | PRSS12     | ENSG00000164099.3  | 3.038351 | 0.558723 | serine protease 12<br>[Source:HGNC<br>Symbol;Acc:HGNC:9477]                       | chr4  | - |
| [78] | TRIM55     | ENSG00000147573.17 | 3.037922 | NA       | tripartite motif containing 55<br>[Source:HGNC<br>Symbol;Acc:HGNC:14215]          | chr8  | + |
| [79] | MYPN       | ENSG00000138347.15 | 3.03143  | 0.00049  | myopalladin [Source:HGNC<br>Symbol;Acc:HGNC:23246]                                | chr10 | + |
| [80] | DOK2       | ENSG00000147443.13 | 3.021816 | 0.218979 | docking protein 2<br>[Source:HGNC<br>Symbol;Acc:HGNC:2991]                        | chr8  | - |
