# Supplementary material for: In Vitro and In Vivo Enhancement of Temozolomide Effect in Human Glioblastoma by Non-Invasive Application of Cold Atmospheric Plasma
Source: MDPI journal article supplement (doi:10.3390/cancers13174485), 2021-09-06
Supplement: s1 [file s1]

**Supplementary Table 4: List of top 97 down-regulated genes in TMZ treatment**

| Sr. No | Gene Name          | GeneID             | Log2(FC) | P-adj    | Description                                                                                             | Chromosome | Strand |
|--------|--------------------|--------------------|----------|----------|---------------------------------------------------------------------------------------------------------|------------|--------|
| [1]    | FRG2               | ENSG00000205097.6  | -8.7864  | 0.132686 | FSHD region gene 2<br>[Source:HGNC<br>Symbol;Acc:HGNC:19136]                                            | chr4       | -      |
| [2]    | KRT16              | ENSG00000186832.9  | -6.68282 | 0.08388  | keratin 16 [Source:HGNC<br>Symbol;Acc:HGNC:6423]                                                        | chr17      | -      |
| [3]    | UCA1               | ENSG00000214049.8  | -6.15995 | 0.034703 | urothelial cancer associated<br>1 [Source:HGNC<br>Symbol;Acc:HGNC:37126]                                | chr19      | +      |
| [4]    | RPL12P42           | ENSG00000213253.5  | -6.05765 | 0.503126 | ribosomal protein L12<br>pseudogene 42<br>[Source:HGNC<br>Symbol;Acc:HGNC:36165]                        | chr19      | -      |
| [5]    | AC026464.4         | ENSG00000260914.3  | -5.77026 | -1.16457 | novel protein                                                                                           | chr16      | +      |
| [6]    | SRGAP2D            | ENSG00000270872.2  | -5.76371 | -0.91615 | SLIT-ROBO Rho GTPase<br>activating protein 2D<br>(pseudogene)<br>[Source:HGNC<br>Symbol;Acc:HGNC:43932] | chr1       | +      |
| [7]    | IGSF9              | ENSG00000085552.17 | -5.74445 | 0.284834 | immunoglobulin<br>superfamily member 9<br>[Source:HGNC<br>Symbol;Acc:HGNC:18132]                        | chr1       | -      |
| [8]    | USH1G              | ENSG00000182040.9  | -5.73359 | 0.461178 | USH1 protein network<br>component sans<br>[Source:HGNC<br>Symbol;Acc:HGNC:16356]                        | chr17      | -      |
| [9]    | COL26A1            | ENSG00000160963.14 | -5.52236 | 0.840672 | collagen type XXVI alpha 1<br>chain [Source:HGNC<br>Symbol;Acc:HGNC:18038]                              | chr7       | +      |
| [10]   | SPANXN5            | ENSG00000204363.5  | -5.44722 | 0.840672 | SPANX family member N5<br>[Source:HGNC<br>Symbol;Acc:HGNC:33178]                                        | chrX       | -      |
| [11]   | LINC02158          | ENSG00000225611.1  | -5.4109  | 0.136383 | long intergenic non-protein<br>coding RNA 2158<br>[Source:HGNC<br>Symbol;Acc:HGNC:53019]                | chr3       | +      |
| [12]   | PIGW               | ENSG00000277161.2  | -5.38043 | -0.4541  | phosphatidylinositol glycan<br>anchor biosynthesis class W<br>[Source:HGNC<br>Symbol;Acc:HGNC:23213]    | chr17      | +      |
| [13]   | TMEM256-<br>PLSCR3 | ENSG00000262481.5  | -5.21211 | 0.120749 | TMEM256-PLSCR3<br>readthrough (NMD)                                                                     | chr17      | -      |

|      |                    |                    |          |          |                                                                                                |       |   |
|------|--------------------|--------------------|----------|----------|------------------------------------------------------------------------------------------------|-------|---|
|      |                    |                    |          |          | candidate) [Source:HGNC<br>Symbol;Acc:HGNC:49186]                                              |       |   |
| [14] | ITGAM              | ENSG00000169896.18 | -5.19877 | 0.000669 | integrin subunit alpha M<br>[Source:HGNC<br>Symbol;Acc:HGNC:6149]                              | chr16 | + |
| [15] | SUN3               | ENSG00000164744.13 | -5.12938 | 0.091184 | Sad1 and UNC84 domain<br>containing 3 [Source:HGNC<br>Symbol;Acc:HGNC:22429]                   | chr7  | - |
| [16] | AC008060.1         | ENSG00000218672.1  | -5.01584 | 0.279553 | novel transcript                                                                               | chr7  | + |
| [17] | EEF1AKMT4-<br>ECE2 | ENSG00000284917.1  | -4.99906 | 0.531394 | EEF1AKMT4-ECE2<br>readthrough [Source:HGNC<br>Symbol;Acc:HGNC:53615]                           | chr3  | + |
| [18] | IGFL2-AS1          | ENSG00000268621.6  | -4.91773 | 9.04E-11 | IGFL2 antisense RNA 1<br>[Source:HGNC<br>Symbol;Acc:HGNC:52559]                                | chr19 | - |
| [19] | AC087203.2         | ENSG00000255556.2  | -4.80291 | 0.406698 | ubiquitin specific peptidase<br>17-like 2 (USP17L2)<br>pseudogene                              | chr8  | - |
| [20] | TTYH2              | ENSG00000141540.11 | -4.67    | 0.292644 | tweety family member 2<br>[Source:HGNC<br>Symbol;Acc:HGNC:13877]                               | chr17 | + |
| [21] | DPEP2              | ENSG00000167261.14 | -4.46583 | 0.081606 | dipeptidase 2<br>[Source:HGNC<br>Symbol;Acc:HGNC:23028]                                        | chr16 | - |
| [22] | AC010307.3         | ENSG00000249478.1  | -4.41534 | 0.00128  | novel transcript                                                                               | chr5  | + |
| [23] | ZPLD1              | ENSG00000170044.8  | -4.40466 | 0.84065  | zona pellucida like domain<br>containing 1 [Source:HGNC<br>Symbol;Acc:HGNC:27022]              | chr3  | + |
| [24] | AC243772.2         | ENSG00000233030.2  | -4.33069 | 0.345848 | novel transcript, antisense to<br>FCGR1A                                                       | chr1  | - |
| [25] | AC087203.1         | ENSG00000254423.1  | -4.314   | 0.513816 | ubiquitin specific peptidase<br>17-like 2 (USP17L2)<br>pseudogene                              | chr8  | - |
| [26] | RSAD2              | ENSG00000134321.12 | -4.25453 | 0.466361 | radical S-adenosyl<br>methionine domain<br>containing 2 [Source:HGNC<br>Symbol;Acc:HGNC:30908] | chr2  | + |
| [27] | ADAP2              | ENSG00000184060.11 | -4.2458  | 0.242928 | ArfGAP with dual PH<br>domains 2 [Source:HGNC<br>Symbol;Acc:HGNC:16487]                        | chr17 | + |
| [28] | ZNF606             | ENSG00000166704.11 | -4.17544 | 0.865038 | zinc finger protein 606<br>[Source:HGNC<br>Symbol;Acc:HGNC:25879]                              | chr19 | - |
| [29] | AGT                | ENSG00000135744.8  | -4.13111 | 1.221965 | angiotensinogen<br>[Source:HGNC<br>Symbol;Acc:HGNC:333]                                        | chr1  | - |

|      |            |                    |          |          |                                                                                          |       |   |
|------|------------|--------------------|----------|----------|------------------------------------------------------------------------------------------|-------|---|
| [30] | LINC01979  | ENSG00000262585.1  | -4.1248  | 0.464105 | long intergenic non-protein coding RNA 1979 [Source:HGNC Symbol;Acc:HGNC:52807]          | chr17 | - |
| [31] | AL356804.1 | ENSG00000259033.2  | -4.09553 | 0.010383 | novel transcript                                                                         | chr14 | + |
| [32] | USP17L7    | ENSG00000226430.6  | -4.09284 | 0.166146 | ubiquitin specific peptidase 17 like family member 7 [Source:HGNC Symbol;Acc:HGNC:37180] | chr8  | - |
| [33] | AC007317.1 | ENSG00000285898.1  | -4.0806  | 0.386161 | Novel transcript                                                                         | chr2  | + |
| [34] | ZNF114     | ENSG00000178150.10 | -4.07478 | 1.057927 | zinc finger protein 114 [Source:HGNC Symbol;Acc:HGNC:12894]                              | chr19 | + |
| [35] | AC116317.1 | ENSG00000286176.2  | -3.9913  | 1.24E-08 | novel transcript                                                                         | chr4  | - |
| [36] | FRG2C      | ENSG00000172969.7  | -3.97335 | 0.000402 | FSHD region gene 2 family member C [Source:HGNC Symbol;Acc:HGNC:33626]                   | chr3  | + |
| [37] | CLDN1      | ENSG00000163347.6  | -3.96997 | 0.529157 | claudin 1 [Source:HGNC Symbol;Acc:HGNC:2032]                                             | chr3  | - |
| [38] | FRG2B      | ENSG00000225899.8  | -3.94699 | 4.50E-17 | FSHD region gene 2 family member B [Source:HGNC Symbol;Acc:HGNC:33518]                   | chr10 | - |
| [39] | DNAH3      | ENSG00000158486.13 | -3.94657 | 0.265449 | dynein axonemal heavy chain 3 [Source:HGNC Symbol;Acc:HGNC:2949]                         | chr16 | - |
| [40] | FOXJ1      | ENSG00000129654.8  | -3.92186 | 0.550647 | forkhead box J1 [Source:HGNC Symbol;Acc:HGNC:3816]                                       | chr17 | - |
| [41] | CEMP1      | ENSG00000205923.3  | -3.87666 | 0.499586 | cementum protein 1 [Source:HGNC Symbol;Acc:HGNC:32553]                                   | chr16 | - |
| [42] | PIP5K1B    | ENSG00000107242.19 | -3.8652  | 0.706124 | phosphatidylinositol-4-phosphate 5-kinase type 1 beta [Source:HGNC Symbol;Acc:HGNC:8995] | chr9  | + |
| [43] | BIRC3      | ENSG00000023445.14 | -3.85706 | 0.870428 | baculoviral IAP repeat containing 3 [Source:HGNC Symbol;Acc:HGNC:591]                    | chr11 | + |
| [44] | AC087428.1 | ENSG00000287505.1  | -3.81978 | 0.647273 | novel transcript                                                                         | chr3  | - |
| [45] | CCR2       | ENSG00000121807.5  | -3.77359 | 0.550516 | C-C motif chemokine receptor 2 [Source:HGNC Symbol;Acc:HGNC:1603]                        | chr3  | + |
| [46] | KRTAP21-2  | ENSG00000187026.3  | -3.75421 | 0.207967 | keratin associated protein 21-2 [Source:HGNC Symbol;Acc:HGNC:18946]                      | chr21 | - |

|      |            |                    |          |          |                                                                                           |       |   |
|------|------------|--------------------|----------|----------|-------------------------------------------------------------------------------------------|-------|---|
| [47] | ADGRD1     | ENSG00000111452.13 | -3.74749 | 0.458347 | adhesion G protein-coupled receptor D1 [Source:HGNC Symbol;Acc:HGNC:19893]                | chr12 | + |
| [48] | ZFH2       | ENSG00000136367.14 | -3.72835 | 1.094583 | zinc finger homeobox 2 [Source:HGNC Symbol;Acc:HGNC:20152]                                | chr14 | - |
| [49] | VTCN1      | ENSG00000134258.17 | -3.66681 | 0.109916 | V-set domain containing T cell activation inhibitor 1 [Source:HGNC Symbol;Acc:HGNC:28873] | chr1  | - |
| [50] | PPP1R36    | ENSG00000165807.8  | -3.65104 | 0.039906 | protein phosphatase 1 regulatory subunit 36 [Source:HGNC Symbol;Acc:HGNC:20097]           | chr14 | + |
| [51] | AL354872.2 | ENSG00000271992.1  | -3.6214  | 0.002496 | novel transcript                                                                          | chr1  | + |
| [52] | CYP4F11    | ENSG00000171903.16 | -3.62111 | 3.24E-10 | cytochrome P450 family 4 subfamily F member 11 [Source:HGNC Symbol;Acc:HGNC:13265]        | chr19 | - |
| [53] | MIR191     | ENSG00000207605.3  | -3.60233 | 0.289471 | microRNA 191 [Source:HGNC Symbol;Acc:HGNC:31561]                                          | chr3  | - |
| [54] | ACAN       | ENSG00000157766.17 | -3.59056 | 0.646842 | aggrecan [Source:HGNC Symbol;Acc:HGNC:319]                                                | chr15 | + |
| [55] | SPINK1     | ENSG00000164266.10 | -3.56928 | 1.57E-25 | serine peptidase inhibitor Kazal type 1 [Source:HGNC Symbol;Acc:HGNC:11244]               | chr5  | - |
| [56] | AC011462.1 | ENSG00000255730.5  | -3.54558 | NA       | novel protein                                                                             | chr19 | + |
| [57] | AL139130.1 | ENSG00000237390.1  | -3.53887 | 0.992135 | novel transcript                                                                          | chr1  | + |
| [58] | FAM71A     | ENSG00000162771.8  | -3.5218  | 0.003251 | family with sequence similarity 71 member A [Source:HGNC Symbol;Acc:HGNC:26541]           | chr1  | + |
| [59] | KRTAP13-2  | ENSG00000182816.9  | -3.51667 | 0.646609 | keratin associated protein 13-2 [Source:HGNC Symbol;Acc:HGNC:18923]                       | chr21 | - |
| [60] | DISP3      | ENSG00000204624.8  | -3.50273 | 0.465766 | dispatched RND transporter family member 3 [Source:HGNC Symbol;Acc:HGNC:29251]            | chr1  | + |
| [61] | GNG7       | ENSG00000176533.13 | -3.46381 | 0.000806 | G protein subunit gamma 7 [Source:HGNC Symbol;Acc:HGNC:4410]                              | chr19 | - |
| [62] | AL160269.1 | ENSG00000285269.2  | -3.45184 | 0.224817 | novel transcript, SLC35D2-HSD17B3 readthrough                                             | chr9  | - |

|      |            |                    |          |          |                                                                                                                   |       |   |
|------|------------|--------------------|----------|----------|-------------------------------------------------------------------------------------------------------------------|-------|---|
| [63] | ADAM30     | ENSG00000134249.7  | -3.44707 | 0.839064 | ADAM metallopeptidase domain 30 [Source:HGNC Symbol;Acc:HGNC:208]                                                 | chr1  | - |
| [64] | WFIKK2     | ENSG00000173714.8  | -3.44707 | 0.839064 | WAP, follistatin/kazal, immunoglobulin, kunitz and netrin domain containing 2 [Source:HGNC Symbol;Acc:HGNC:30916] | chr17 | + |
| [65] | MT1JP      | ENSG00000255986.6  | -3.43573 | 0.008158 | metallothionein 1J, pseudogene [Source:HGNC Symbol;Acc:HGNC:7402]                                                 | chr16 | + |
| [66] | ZDHHC11B   | ENSG00000206077.11 | -3.42131 | 0.001183 | zinc finger DHHC-type containing 11B [Source:HGNC Symbol;Acc:HGNC:32962]                                          | chr5  | - |
| [67] | GADD45G    | ENSG00000130222.11 | -3.38139 | 1.86E-05 | growth arrest and DNA damage inducible gamma [Source:HGNC Symbol;Acc:HGNC:4097]                                   | chr9  | + |
| [68] | RIMKLA     | ENSG00000177181.15 | -3.35908 | 1.405643 | ribosomal modification protein rimK like family member A [Source:HGNC Symbol;Acc:HGNC:28725]                      | chr1  | + |
| [69] | LINC00917  | ENSG00000168367.11 | -3.35592 | 0.828759 | long intergenic non-protein coding RNA 917 [Source:HGNC Symbol;Acc:HGNC:48607]                                    | chr16 | - |
| [70] | HIPK4      | ENSG00000160396.9  | -3.34562 | 0.078817 | homeodomain interacting protein kinase 4 [Source:HGNC Symbol;Acc:HGNC:19007]                                      | chr19 | - |
| [71] | MRGPRE     | ENSG00000184350.11 | -3.32657 | 1.217165 | MAS related GPR family member E [Source:HGNC Symbol;Acc:HGNC:30694]                                               | chr11 | - |
| [72] | IGF2       | ENSG00000167244.21 | -3.32608 | 7.76E-05 | insulin like growth factor 2 [Source:HGNC Symbol;Acc:HGNC:5466]                                                   | chr11 | - |
| [73] | AL031590.1 | ENSG00000284633.1  | -3.32485 | 0.001218 | novel transcript, antisense to PDGFB                                                                              | chr22 | + |
| [74] | CNTN4      | ENSG00000144619.15 | -3.32029 | 0.282148 | contactin 4 [Source:HGNC Symbol;Acc:HGNC:2174]                                                                    | chr3  | + |
| [75] | U3         | ENSG00000207119.2  | -3.31464 | 0.397104 | Small nucleolar RNA U3 [Source:RFAM;Acc:RF00012]                                                                  | chr15 | - |
| [76] | LINC01647  | ENSG00000235643.2  | -3.29703 | 1.60E-09 | long intergenic non-protein coding RNA 1647 [Source:HGNC Symbol;Acc:HGNC:52434]                                   | chr1  | + |

|      |            |                    |          |          |                                                                                                            |       |   |
|------|------------|--------------------|----------|----------|------------------------------------------------------------------------------------------------------------|-------|---|
| [77] | CD248      | ENSG00000174807.4  | -3.28354 | 1.458435 | CD248 molecule<br>[Source:HGNC<br>Symbol;Acc:HGNC:18219]                                                   | chr11 | - |
| [78] | AC008969.1 | ENSG00000176593.8  | -3.25031 | 0.837431 | novel transcript, antisense to<br>ZNF606                                                                   | chr19 | + |
| [79] | AC068946.3 | ENSG00000287529.1  | -3.23906 | 1.90E-05 | novel transcript, antisense to<br>ZFAND2B                                                                  | chr2  | - |
| [80] | AC004453.2 | ENSG00000279853.1  | -3.23473 | 0.542367 | tec                                                                                                        | chr7  | - |
| [81] | SPRR2D     | ENSG00000163216.7  | -3.22746 | 1.27E-06 | small proline rich protein 2D<br>[Source:HGNC<br>Symbol;Acc:HGNC:11264]                                    | chr1  | - |
| [82] | ATP1B2     | ENSG00000129244.9  | -3.22218 | 2.16E-06 | ATPase Na+/K+ transporting<br>subunit beta 2<br>[Source:HGNC<br>Symbol;Acc:HGNC:805]                       | chr17 | + |
| [83] | LINC01655  | ENSG00000227925.2  | -3.20261 | 1.053869 | long intergenic non-protein<br>coding RNA 1655<br>[Source:HGNC<br>Symbol;Acc:HGNC:52443]                   | chr1  | - |
| [84] | THSD7A     | ENSG00000005108.16 | -3.19182 | 0.404926 | thrombospondin type 1<br>domain containing 7A<br>[Source:HGNC<br>Symbol;Acc:HGNC:22207]                    | chr7  | - |
| [85] | ST6GALNAC1 | ENSG00000070526.15 | -3.1767  | 0.644325 | ST6 N-<br>acetylgalactosaminide<br>alpha-2,6-sialyltransferase 1<br>[Source:HGNC<br>Symbol;Acc:HGNC:23614] | chr17 | - |
| [86] | TBC1D29P   | ENSG00000266733.7  | -3.17261 | 0.387559 | TBC1 domain family<br>member 29, pseudogene<br>[Source:HGNC<br>Symbol;Acc:HGNC:24509]                      | chr17 | + |
| [87] | AC004835.1 | ENSG00000230392.1  | -3.1628  | 0.003573 | novel transcript                                                                                           | chrX  | + |
| [88] | AL022476.1 | ENSG00000230319.1  | -3.16201 | 1.07103  | TTLL1 antisense RNA 1<br>[Source:HGNC<br>Symbol;Acc:HGNC:40111]                                            | chr22 | + |
| [89] | RNU2-62P   | ENSG00000222800.1  | -3.16022 | 1.053147 | RNA, U2 small nuclear 62,<br>pseudogene [Source:HGNC<br>Symbol;Acc:HGNC:48555]                             | chr6  | - |
| [90] | ANKFN1     | ENSG00000153930.12 | -3.15852 | 0.012759 | ankyrin repeat and<br>fibronectin type III domain<br>containing 1 [Source:HGNC<br>Symbol;Acc:HGNC:26766]   | chr17 | + |
| [91] | AC024082.1 | ENSG00000231923.1  | -3.14161 | 1.212761 | Der1-like domain family,<br>member 2 (DERL2)<br>pseudogene                                                 | chr7  | + |
| [92] | DRAXIN     | ENSG00000162490.7  | -3.14049 | 0.880859 | dorsal inhibitory axon<br>guidance protein                                                                 | chr1  | + |

|      |           |                    |          |          |                                                                                        |       |   |
|------|-----------|--------------------|----------|----------|----------------------------------------------------------------------------------------|-------|---|
|      |           |                    |          |          | [Source:HGNC<br>Symbol;Acc:HGNC:25054]                                                 |       |   |
| [93] | DYDC2     | ENSG00000133665.13 | -3.12557 | 0.438439 | DPY30 domain containing 2<br>[Source:HGNC<br>Symbol;Acc:HGNC:23468]                    | chr10 | + |
| [94] | OLAH      | ENSG00000152463.14 | -3.10515 | 0.224076 | oleoyl-ACP hydrolase<br>[Source:HGNC<br>Symbol;Acc:HGNC:25625]                         | chr10 | + |
| [95] | CEACAM22P | ENSG00000230666.5  | -3.04973 | 1.206904 | CEA cell adhesion molecule<br>22, pseudogene<br>[Source:HGNC<br>Symbol;Acc:HGNC:38029] | chr19 | - |
| [96] | DHRS2     | ENSG00000100867.14 | -3.02059 | 0.026003 | dehydrogenase/reductase 2<br>[Source:HGNC<br>Symbol;Acc:HGNC:18349]                    | chr14 | + |
| [97] | GSTM3     | ENSG00000134202.11 | -3.01131 | 0.182558 | glutathione S-transferase mu<br>3 [Source:HGNC<br>Symbol;Acc:HGNC:4635]                | chr1  | - |
